# Supplementary material for: Histone methyltransferase SETD2 inhibits tumor growth via suppressing CXCL1-mediated activation of cell cycle in lung adenocarcinoma
Source: Aging (Albany NY). 2020 Nov 20;12(24):25189–206. doi: 10.18632/aging.104120 (PMC7803529; doi:10.18632/aging.104120)
Supplement: Supplementary Table 1 [file aging-12-104120-s002.xlsx]

## Sheet: up_ShSETD_vs_Control
#log2FC >= 0.585 #p-value cut-off <= 0.05 #q-value cut-off <= 1.00 #Transcript biotype: processed_transcript,lincRNA,3prime_overlapping_ncrna,antisense,non_coding,sense_intronic,sense_overlapping,TEC,known_ncrna,macro_lncRNA,bidirectional_promoter_lncrna,ncRNA,protein_coding #Condition pair: up_ShSETD_vs_Control Column A: Track_id, The database name in transcript level. Column B: Gene_Name, The n…
Annotation						DE Statistic				FPKM
Track_id	Gene_Name	Trans_Name	Locus	Strand	Trans_Type	log2FC	Fold_Change	p_value	q_value	ShSETD_FPKM	Control_FPKM	control-1	control-2	control-3	shSETD2-1	shSETD2-2	shSETD2-3
ENST00000306061.10_1	MT1E	MT1E-201	chr16:56659387-56661024	+	protein_coding	9.11091	552.913	6.27183e-08	2.30628e-05	9.18558	0.074671	0	0.167978	0	601.216	539.366	605.687
ENST00000331442.4_1	HIST1H1B	HIST1H1B-201	chr6:27834627-27835307	-	protein_coding	8.75463	431.922	4.88487e-10	2.16612e-06	8.75463	0	0	0	0	437.433	415.536	440.225
ENST00000395761.3_1	CXCL1	CXCL1-201	chr4:74735121-74736959	+	protein_coding	8.65463	402.998	1.29307e-08	9.37277e-06	8.71118	0.056554	0	0.124795	0	408.536	423.618	422.343
ENST00000368719.8_2	S100A6	S100A6-201	chr1:153507075-153508698	-	protein_coding	8.53317	370.459	3.67201e-06	0.000254422	8.7677	0.234529	0	0.62855	0	427.974	415.499	462.423
ENST00000376377.2_1	IER3	IER3-202	chr6:30710976-30712325	-	protein_coding	8.35694	327.86	0.000112756	0.00212553	8.4285	0.0715603	0.032493	0.062273	0.05804	195.516	717.316	288.721
ENST00000361475.6_1	TGM2	TGM2-201	chr20:36755789-36793774	-	protein_coding	7.9519	247.606	1.53516e-08	1.05396e-05	8.44319	0.491287	0.401685	0.455797	0.36121	356.133	324.355	361.886
ENST00000446342.5_1	PLAU	PLAU-202	chr10:75670862-75677254	+	protein_coding	7.93671	245.012	1.90772e-05	0.000690503	8.58115	0.644447	1.18319	0	0.749454	391.898	369.138	385.287
ENST00000616365.1_1	HIST1H3I	HIST1H3I-201	chr6:27839683-27840093	-	protein_coding	7.87881	235.374	4.21912e-08	1.91735e-05	7.87881	0	0	0	0	247.897	212.019	244.946
ENST00000307407.7_1	CXCL8	CXCL8-201	chr4:74606223-74609433	+	protein_coding	7.81431	225.083	1.82059e-08	1.17302e-05	8.23239	0.418075	0.324764	0.352335	0.331486	277.367	306.688	316.584
ENST00000552150.5_2	KRT8	KRT8-215	chr12:53291081-53320253	-	protein_coding	7.7371	213.354	7.71322e-09	7.23328e-06	7.7371	0	0	0	0	219.567	199.084	219.063
ENST00000370507.5_1	SLCO4A1	SLCO4A1-202	chr20:61287711-61303645	+	protein_coding	7.66251	202.603	2.5064e-06	0.000197953	7.89313	0.230617	0.519817	0	0.062861	247.073	220.779	243.175
ENST00000305366.7_1	TM4SF1	TM4SF1-201	chr3:149086809-149095652	-	protein_coding	7.59058	192.749	2.01184e-12	7.58301e-08	7.59058	0	0	0	0	192.766	192.251	190.24
ENST00000339276.5_1	SFN	SFN-201	chr1:27189629-27190948	+	protein_coding	7.47163	177.494	1.13766e-07	3.36319e-05	7.92574	0.454113	0.484911	0.347866	0.284569	256.46	222.338	249.027
ENST00000377733.3_1	HIST1H2BI	HIST1H2BI-201	chr6:26273204-26273584	+	protein_coding	7.46368	176.519	4.33047e-09	6.04534e-06	7.51829	0.0546066	0	0.078512	0.038699	176.74	185.787	184.592
ENST00000331817.5_1	KRT7	KRT7-201	chr12:52626898-52642705	+	protein_coding	7.33594	161.561	5.65295e-08	2.19823e-05	7.39175	0.055816	0	0.061185	0.058317	164.063	155.578	182.247
ENST00000618305.1_1	HIST1H4L	HIST1H4L-201	chr6:27840977-27841288	-	protein_coding	7.33306	161.239	1.04531e-09	3.28332e-06	7.33306	0	0	0	0	156.859	157.741	166.282
ENST00000375486.8_1	PADI2	PADI2-202	chr1:17393256-17445930	-	protein_coding	7.24974	152.191	4.53491e-07	7.21461e-05	8.57557	1.32583	1.16115	1.54613	1.86271	387.77	367.498	386.601
ENST00000296129.5_3	CDCP1	CDCP1-201	chr3:45123770-45187914	-	protein_coding	7.23456	150.598	1.37112e-09	3.63221e-06	7.31031	0.0757525	0.086274	0.028292	0.047986	158.698	154.355	160.155
ENST00000263398.10_1	CD44	CD44-201	chr11:35160417-35253949	+	protein_coding	7.21832	148.913	2.54873e-09	4.72034e-06	7.37633	0.158006	0.114025	0.137921	0.095688	160.563	171.672	163.409
ENST00000621112.1_1	HIST1H2BM	HIST1H2BM-201	chr6:27782822-27783202	+	protein_coding	7.19707	146.735	6.71487e-09	7.23328e-06	7.19707	0	0	0	0	144.833	139.053	153.687
ENST00000508487.2_1	CXCL2	CXCL2-202	chr4:74962752-74965010	-	protein_coding	7.15558	142.575	1.23309e-06	0.000129464	7.83697	0.681388	0.388947	0.960219	0.514831	218.249	234.568	230.436
ENST00000264832.7_1	ICAM1	ICAM1-201	chr19:10381511-10397291	+	protein_coding	7.0831	135.59	2.77179e-09	4.72034e-06	7.22719	0.144085	0.116155	0.104251	0.094786	155.005	143.591	148.115
ENST00000295522.3_1	CLDN1	CLDN1-201	chr3:190023490-190040264	-	protein_coding	6.98344	126.539	6.88896e-09	7.23328e-06	7.7357	0.75226	0.660438	0.672542	0.720912	203.263	222.421	211.187
ENST00000252809.3_1	GDF15	GDF15-201	chr19:18496968-18499986	+	protein_coding	6.9086	120.142	7.62282e-08	2.62392e-05	8.5181	1.60951	1.90803	2.19923	2.0541	380.25	335.608	382.953
ENST00000249075.3_1	LIF	LIF-201	chr22:30636436-30642840	-	protein_coding	6.71505	105.058	1.31974e-08	9.38556e-06	7.28515	0.570101	0.494599	0.523063	0.437508	159.993	146.831	158.431
ENST00000449264.2_1	TNF	TNF-208	chr6:31543344-31546113	+	protein_coding	6.68981	103.236	3.64988e-08	1.75866e-05	6.77468	0.0848727	0.063435	0	0.121855	109.946	103.519	112.199
ENST00000404625.5_1	IL6	IL6-204	chr7:22765503-22771621	+	protein_coding	6.65449	100.74	2.7043e-07	5.46544e-05	6.65449	0	0	0	0	104.717	87.2106	108.632
ENST00000320031.12_2	ITGA3	ITGA3-202	chr17:48133474-48167844	+	protein_coding	6.63037	99.0693	4.71947e-06	0.000296477	7.85317	1.22281	1.10684	0.983533	2.04253	244.633	223.91	222.783
ENST00000378858.4_1	LRRN4	LRRN4-201	chr20:6021424-6034695	-	protein_coding	6.49716	90.3318	5.56383e-08	2.19823e-05	6.53146	0.0343021	0	0.034367	0.038253	94.4683	84.0324	96.5115
ENST00000376327.5_1	PLP2	PLP2-202	chrX:49028273-49031588	+	protein_coding	6.47837	89.1629	5.99669e-07	8.35993e-05	8.3473	1.86893	2.34756	3.2372	2.4356	332.772	306.656	335.394
ENST00000526390.5_1	TXNRD1	TXNRD1-212	chr12:104680768-104744052	+	protein_coding	6.47437	88.916	0.000176914	0.0028148	7.08921	0.614838	0.057151	1.97502	0.141895	138.409	138.815	128.524
ENST00000526145.6_2	ETS1	ETS1-204	chr11:128330139-128392096	-	protein_coding	6.38673	83.6753	3.72125e-09	5.29288e-06	6.41199	0.0252606	0.053932	0	0	85.7662	84.7828	81.957
ENST00000619466.2_1	HIST1H2BH	HIST1H2BH-201	chr6:26251879-26253938	+	protein_coding	6.30727	79.1912	4.74854e-08	2.01144e-05	6.34837	0.0410993	0	0.089222	0	83.1683	75.7683	82.7177
ENST00000245185.5_1	MT2A	MT2A-201	chr16:56642111-56643409	+	protein_coding	6.30459	79.0443	4.26397e-08	1.91735e-05	9.96995	3.66536	11.9771	11.5073	11.5838	1015.4	931.933	1062.77
ENST00000483180.5_2	NFKBIZ	NFKBIZ-207	chr3:101546837-101576303	+	protein_coding	6.29166	78.3389	8.69023e-09	7.70711e-06	6.29166	0	0	0	0	74.8877	75.6569	81.6438
ENST00000215909.9_1	LGALS1	LGALS1-201	chr22:38071615-38075813	+	protein_coding	6.25473	76.3592	1.5422e-05	0.000607086	8.71648	2.46175	4.61598	3.07391	6.30712	444.527	386.677	429.945
ENST00000244869.2_1	EREG	EREG-201	chr4:75230860-75254468	+	protein_coding	6.25279	76.2563	3.30796e-07	6.21672e-05	6.26391	0.0111281	0.02341	0	0	70.1093	86.6251	71.832
ENST00000496817.5_2	S100A6	S100A6-205	chr1:153507075-153508691	-	protein_coding	6.24485	75.8378	7.50508e-06	0.000393985	6.24485	0	0	0	0	96.4222	57.9483	74.95
ENST00000582743.5_1	SLC16A3	SLC16A3-214	chr17:80186908-80197355	+	protein_coding	6.21156	74.1079	7.8681e-09	7.23328e-06	6.21156	0	0	0	0	72.5521	70.1567	76.7649
ENST00000274276.7_1	OSMR	OSMR-201	chr5:38846101-38935743	+	protein_coding	6.1353	70.2923	7.77442e-09	7.23328e-06	6.31978	0.184489	0.138641	0.169475	0.102129	78.3277	81.7797	76.622
ENST00000222543.9_1	TFPI2	TFPI2-201	chr7:93514709-93520303	-	protein_coding	6.0964	68.4225	6.82637e-08	2.42735e-05	7.0271	0.930706	0.9146	1.02631	0.785362	124.885	135.452	128.169
ENST00000538132.1_1	AHCY	AHCY-205	chr20:32868076-32899608	-	protein_coding	6.07788	67.5499	1.5065e-08	1.05396e-05	6.07788	0	0	0	0	62.6386	68.5623	68.6272
ENST00000396650.6_1	C15orf48	C15orf48-202	chr15:45722727-45725540	+	protein_coding	6.06409	66.907	1.58124e-07	4.15331e-05	6.13218	0.0680928	0.15211	0	0	65.8791	69.7595	71.9178
ENST00000358813.4_1	CCL20	CCL20-201	chr2:228678570-228682250	+	protein_coding	6.01459	64.6504	4.54584e-08	1.96944e-05	6.01459	0	0	0	0	63.7787	68.0866	59.3794
ENST00000258743.9_1	IL6	IL6-201	chr7:22766766-22771619	+	protein_coding	5.99833	63.9261	1.31127e-06	0.000133868	5.99833	0	0	0	0	54.0712	74.1515	62.1208
ENST00000260324.11_1	SQOR	SQOR-201	chr15:45926938-45983492	+	protein_coding	5.87157	58.549	1.23314e-05	0.000531842	6.24766	0.376085	0.287275	0.698115	0	73.7341	72.9834	78.3494
ENST00000435432.6_2	NEDD4L	NEDD4L-207	chr18:55816565-56063783	+	protein_coding	5.84735	57.5741	1.75383e-08	1.14966e-05	5.84847	0.00112591	0	0.002344	0	54.0647	59.9471	55.9997
ENST00000518745.1_1	HAVCR1	HAVCR1-203	chr5:156479376-156485407	-	protein_coding	5.84454	57.4621	4.46788e-10	2.10504e-06	5.84454	0	0	0	0	55.1326	57.3558	56.9221
ENST00000614097.2_1	HIST1H2BE	HIST1H2BE-201	chr6:26183958-26184454	+	protein_coding	5.84055	57.3036	7.42528e-08	2.56765e-05	6.69752	0.856964	0.74835	0.787896	0.900836	109.012	96.5895	103.14
ENST00000296871.3_1	CSF2	CSF2-201	chr5:131409483-131411863	+	protein_coding	5.80337	55.8455	9.45162e-09	8.0966e-06	5.80337	0	0	0	0	56.197	52.0867	56.3594
ENST00000392910.6_1	ZYX	ZYX-203	chr7:143079000-143088202	+	protein_coding	5.80247	55.8107	6.77407e-06	0.000369505	6.49991	0.697441	0.261713	0.772537	0.906759	93.6112	83.9394	91.2468
ENST00000550600.5_1	KRT18	KRT18-207	chr12:53342670-53346596	+	protein_coding	5.76111	54.2335	0.000527413	0.00568625	6.91329	1.15218	0.021166	2.17604	2.38482	129.502	108.078	122.017
ENST00000469878.5_1	EFNA1	EFNA1-203	chr1:155100364-155106962	+	processed_transcript	5.75599	54.0413	0.000101035	0.00198448	5.83273	0.0767372	0	0.173007	0	44.702	42.0079	93.1876
ENST00000428746.6_1	RAI14	RAI14-202	chr5:34656575-34832716	+	protein_coding	5.743	53.5568	2.20371e-05	0.000752716	5.86242	0.119425	0.042105	0.229886	0.000174	41.025	68.7788	66.1528
ENST00000264144.4_1	LAMC2	LAMC2-201	chr1:183155423-183214035	+	protein_coding	5.73197	53.149	3.19438e-08	1.62706e-05	5.98266	0.25069	0.212978	0.24607	0.114295	61.7111	62.5691	62.4292
ENST00000602540.5_1	PHLDA1	PHLDA1-202	chr12:76419227-76425384	-	protein_coding	5.72328	52.8296	3.47916e-06	0.000244513	5.9304	0.207124	0.148747	0.339143	0	52.1017	65.5597	63.1748
ENST00000223095.4_1	SERPINE1	SERPINE1-201	chr7:100770370-100782547	+	protein_coding	5.70137	52.0334	2.31774e-09	4.72034e-06	5.7881	0.086735	0.068249	0.085845	0.032498	54.7018	53.2408	54.8445
ENST00000438964.6_1	ACTN1	ACTN1-204	chr14:69341403-69445979	-	protein_coding	5.65589	50.4188	0.00111417	0.00926655	5.65589	0	0	0	0	77.8878	81.1981	18.7654
ENST00000470412.5_1	SLCO4A1	SLCO4A1-206	chr20:61297767-61301574	+	processed_transcript	5.64503	50.0408	3.2768e-06	0.000235032	5.94196	0.296931	0.402565	0.074555	0.23028	69.03	53.2653	60.1394
ENST00000368706.8_1	S100A16	S100A16-204	chr1:153579362-153585559	-	protein_coding	5.62546	49.3664	5.58823e-08	2.19823e-05	5.62546	0	0	0	0	49.9662	44.7407	50.6072
ENST00000616406.1_1	TSPAN14	TSPAN14-210	chr10:82248968-82279384	+	protein_coding	5.614	48.9759	1.42873e-06	0.000142277	5.74738	0.133383	0	0.295961	0.018274	54.9546	51.4757	51.797
ENST00000615513.4_1	CDKN1A	CDKN1A-208	chr6:36644237-36655114	+	protein_coding	5.5618	47.2354	0.000812233	0.00752499	6.74995	1.18816	3.08228	1.89807	0	109.79	101.854	108.419
ENST00000245907.10_1	C3	C3-201	chr19:6677715-6720693	-	protein_coding	5.54246	46.6064	2.61717e-06	0.000201937	6.70125	1.1588	1.08793	1.708	0.968487	105.164	100.562	103.503
ENST00000294338.6_1	PDZK1IP1	PDZK1IP1-201	chr1:47649265-47655727	-	protein_coding	5.53375	46.3259	7.27256e-07	9.41984e-05	5.53375	0	0	0	0	45.5592	39.8224	51.3078
ENST00000574232.5_1	WSCD1	WSCD1-209	chr17:5974428-6024030	+	protein_coding	5.53354	46.3194	6.83667e-09	7.23328e-06	5.53354	0	0	0	0	45.6731	43.4215	46.9323
ENST00000391911.5_1	LAMB3	LAMB3-203	chr1:209788220-209824679	-	protein_coding	5.5109	45.5979	6.93083e-07	9.19847e-05	5.60143	0.0905341	0	0.06773	0.130574	44.4705	44.902	53.8322
ENST00000356082.8_1	LAMB3	LAMB3-201	chr1:209788215-209825811	-	protein_coding	5.50464	45.4006	3.45139e-09	5.10157e-06	5.51228	0.00764341	0	0	0.016021	45.3544	43.0396	45.5752
ENST00000340006.6_1	CSRP1	CSRP1-201	chr1:201452662-201476387	-	protein_coding	5.50215	45.3223	7.09409e-05	0.00158925	5.50215	0	0	0	0	34.6792	35.7258	70.0474
ENST00000356476.2_1	HIST1H3D	HIST1H3D-201	chr6:26197068-26197478	-	protein_coding	5.48825	44.8878	1.98732e-05	0.000707357	7.53967	2.05142	4.46253	3.17461	2.12328	189.974	177.474	187.997
ENST00000375481.1_1	PADI2	PADI2-201	chr1:17405526-17445930	-	protein_coding	5.4573	43.9349	1.28568e-05	0.000542967	5.82084	0.363545	0.315649	0.618729	0	60.2218	53.2999	53.3299
ENST00000216446.8_1	PLEK2	PLEK2-201	chr14:67853700-67878917	-	protein_coding	5.43831	43.3604	8.47313e-09	7.60403e-06	5.43831	0	0	0	0	43.7845	40.4618	42.9041
ENST00000517927.1_1	MIR3142HG	MIR3142HG-201	chr5:159895275-159914433	+	lincRNA	5.42672	43.0135	2.23222e-08	1.29441e-05	5.44568	0.0189564	0	0.040206	0	42.9481	44.3955	40.4937
ENST00000618966.1_1	AL161431.1	AL161431.1-201	chr13:109921982-109926186	+	lincRNA	5.42616	42.997	1.06929e-08	8.31897e-06	5.46055	0.0343901	0.041267	0.007065	0.024325	43.7785	44.2713	41.1191
ENST00000369583.3_1	DUSP5	DUSP5-201	chr10:112257596-112271302	+	protein_coding	5.42371	42.9238	2.1095e-07	4.76116e-05	7.65464	2.23093	3.30461	4.03685	3.77136	203.303	191.652	206.865
ENST00000306560.1_1	HAS3	HAS3-202	chr16:69141443-69151571	+	protein_coding	5.40028	42.2325	1.96389e-05	0.000700642	5.85376	0.453481	0	0.566304	0.639298	59.3046	54.2931	57.0033
ENST00000367030.7_1	LAMB3	LAMB3-202	chr1:209788322-209825674	-	protein_coding	5.39583	42.1024	9.5762e-09	8.11115e-06	5.39583	0	0	0	0	40.4074	43.1129	39.8578
ENST00000531493.5_1	FOSL1	FOSL1-203	chr11:65659945-65667890	-	protein_coding	5.36563	41.2302	5.95779e-05	0.00142533	5.51797	0.152338	0	0.372699	0	37.611	36.8417	64.8476
ENST00000260356.5_1	THBS1	THBS1-201	chr15:39873294-39891667	+	protein_coding	5.3578	41.0071	7.27276e-09	7.23328e-06	5.44968	0.091875	0.096292	0.061995	0.039735	41.3714	43.5345	43.2365
ENST00000272462.2_1	MALL	MALL-201	chr2:110841447-110874143	-	protein_coding	5.34764	40.7194	2.38618e-11	3.1196e-07	5.3519	0.00425677	0.008891	0	0	39.5955	39.742	40.184
ENST00000399808.4_1	IFITM3	IFITM3-201	chr11:319669-321050	-	protein_coding	5.34224	40.5671	0.000117447	0.00217854	6.66132	1.31908	0.844135	1.34477	2.59218	92.365	80.5449	135.204
ENST00000379818.3_1	MT1M	MT1M-201	chr16:56666145-56667898	+	protein_coding	5.34007	40.5061	1.06405e-07	3.23824e-05	5.34007	0	0	0	0	40.9323	36.2067	41.5981
ENST00000367609.7_3	ADGRG6	ADGRG6-204	chr6:142623066-142767385	+	protein_coding	5.31917	39.9235	1.01958e-07	3.16298e-05	5.32634	0.00717365	0	0.015029	0	36.243	42.039	39.2955
ENST00000514062.2_1	IGFBP7	IGFBP7-203	chr4:57898204-57976551	-	protein_coding	5.30641	39.5722	2.21464e-06	0.000184896	5.54994	0.243522	0.409494	0.075179	0.09491	44.7171	44.7103	48.204
ENST00000279022.6_1	MYL9	MYL9-201	chr20:35169887-35179850	+	protein_coding	5.2983	39.3502	2.9136e-07	5.70863e-05	5.32441	0.0261095	0	0	0.055794	39.8395	35.3613	42.3211
ENST00000372638.3_1	CITED4	CITED4-201	chr1:41326723-41328038	-	protein_coding	5.28206	38.9099	5.24606e-07	7.76953e-05	7.50004	2.21798	3.39532	4.00055	3.5817	185.694	163.093	192.64
ENST00000295666.6_1	IGFBP7	IGFBP7-201	chr4:57896939-57976551	-	protein_coding	5.27078	38.6068	7.21365e-06	0.000384306	5.96008	0.689294	0.304481	0.89447	0.69656	67.7167	58.1263	58.3805
ENST00000257497.10_1	ANXA1	ANXA1-201	chr9:75766673-75785309	+	protein_coding	5.25294	38.1323	6.80928e-05	0.00155296	5.62652	0.373578	0.871809	0	0.161752	39.6837	53.8589	53.0241
ENST00000614378.1_1	HIST1H3G	HIST1H3G-201	chr6:26269633-26272043	-	protein_coding	5.2455	37.936	1.1805e-07	3.40961e-05	5.26156	0.0160643	0	0	0.033969	39.195	34.3055	38.7784
ENST00000301178.8_1	AXL	AXL-201	chr19:41725108-41767671	+	protein_coding	5.2412	37.8233	1.19062e-07	3.41268e-05	5.46366	0.222453	0.208967	0.210592	0.085133	42.5707	41.7143	45.1747
ENST00000527335.5_1	TXNRD1	TXNRD1-216	chr12:104682673-104713351	+	protein_coding	5.23104	37.5577	3.09417e-05	0.000931195	5.47057	0.239536	0	0.645595	0	39.1145	45.8327	45.4053
ENST00000548998.5_1	KRT8	KRT8-210	chr12:53293792-53343560	-	protein_coding	5.2046	36.8758	6.82712e-06	0.000371223	6.05152	0.846918	0.889076	0.737091	0.773256	53.7576	64.326	80.5712
ENST00000526950.1_1	TXNRD1	TXNRD1-215	chr12:104703629-104742261	+	protein_coding	5.19377	36.6	0.0305108	0.0896007	6.77716	1.58339	0	25.912	0	104.762	109.476	111.926
ENST00000344300.3_1	C15orf48	C15orf48-201	chr15:45722805-45725647	+	protein_coding	5.19206	36.5566	1.07044e-08	8.31897e-06	5.25417	0.0621123	0.010704	0.08529	0.037345	37.4639	37.6779	36.3658
ENST00000605997.5_2	NDUFB1	NDUFB1-206	chr14:92582469-92588071	-	protein_coding	5.16459	35.8671	0.000136197	0.00239611	5.60388	0.439287	0.082763	0.036185	1.22201	45.2025	47.5952	50.2325
ENST00000359263.8_1	MYOF	MYOF-202	chr10:95066187-95241951	-	protein_coding	5.16116	35.7819	8.1542e-05	0.00173496	5.65225	0.491091	0.290135	0.492086	0.442349	60.2901	31.7877	62.2976
ENST00000388835.3_1	KRT18	KRT18-201	chr12:53342748-53346685	+	protein_coding	5.15943	35.7391	2.24061e-05	0.000760839	8.24486	3.08543	7.228	5.61083	10.2427	305.528	283.872	318.694
ENST00000320623.9_1	NQO1	NQO1-201	chr16:69743304-69760854	-	protein_coding	5.15799	35.7034	1.69413e-05	0.000644027	5.70902	0.551034	0.209994	0.403971	0.851363	43.8156	54.578	56.4683
ENST00000620121.4_1	ASXL1	ASXL1-212	chr20:30946216-31025694	+	protein_coding	5.15784	35.6997	1.12477e-05	0.00050208	5.15784	0	0	0	0	40.4897	26.4067	39.0126
ENST00000301246.9_2	C19orf33	C19orf33-201	chr19:38794801-38795649	+	protein_coding	5.15759	35.6936	2.15241e-09	4.72034e-06	5.15759	0	0	0	0	35.5943	33.6872	34.8252
ENST00000368445.9_1	SHC1	SHC1-202	chr1:154934774-154943217	-	protein_coding	5.1567	35.6716	2.73571e-06	0.000208027	6.63793	1.48122	1.68163	2.13507	1.5884	103.977	85.3746	107.934
ENST00000336967.7_1	MYADM	MYADM-201	chr19:54369611-54379682	+	protein_coding	5.14798	35.4566	0.00048008	0.00536312	5.64084	0.492861	0	1.78675	0	47.7392	47.4881	51.5624
ENST00000374882.7_1	PSMB8	PSMB8-202	chr6:32808494-32811824	-	protein_coding	5.12134	34.8078	7.58605e-10	2.82371e-06	5.12134	0	0	0	0	33.6537	33.1856	34.599
ENST00000376809.9_1	HLA-A	HLA-A-203	chr6:29910247-29913661	+	protein_coding	5.10228	34.3511	0.0390967	0.106618	6.75561	1.65333	0	30.1247	0	66.3183	130.499	141.518
ENST00000297261.6_1	SHH	SHH-201	chr7:155592680-155604967	-	protein_coding	5.07328	33.6675	8.94094e-06	0.000440578	5.10574	0.0324592	0	0	0.069827	26.0527	37.1771	38.5304
ENST00000569253.5_3	RIPOR1	RIPOR1-221	chr16:67571376-67576568	+	protein_coding	5.06961	33.5819	4.30723e-06	0.000280245	5.06961	0	0	0	0	39.0191	32.7172	27.0671
ENST00000263464.7_1	BIRC3	BIRC3-201	chr11:102188226-102208465	+	protein_coding	5.06678	33.5159	5.17728e-06	0.000311347	5.32386	0.257084	0.200525	0.341732	0.059578	33.572	45.0282	39.3809
ENST00000274289.7_1	PLK2	PLK2-201	chr5:57749809-57756087	-	protein_coding	5.0641	33.4538	2.22949e-06	0.000185735	6.49892	1.43482	1.65984	1.5853	1.87347	78.3372	87.9662	103.811
ENST00000315050.11_1	TNIP1	TNIP1-201	chr5:150409510-150466719	-	protein_coding	5.05041	33.1379	0.00951754	0.0398041	6.49329	1.44288	0	1.06111	8.74876	45.4434	118.266	131.003
ENST00000614911.2_1	HIST1H3E	HIST1H3E-201	chr6:26225383-26225844	+	protein_coding	5.02779	32.6223	0.00511627	0.0260053	6.17534	1.14755	0.199726	0.170716	6.74113	75.0685	66.6661	72.3344
ENST00000625904.2_1	HAVCR1	HAVCR1-206	chr5:156456531-156485487	-	protein_coding	5.01998	32.4463	2.4718e-06	0.000197728	5.01998	0	0	0	0	31.7257	26.7332	36.6364
ENST00000404377.3_1	TNFSF18	TNFSF18-201	chr1:173009100-173020103	-	protein_coding	5.01748	32.39	4.9163e-09	6.61475e-06	5.01748	0	0	0	0	31.7495	32.2187	30.2354
ENST00000409189.7_1	CCL20	CCL20-202	chr2:228678558-228682280	+	protein_coding	5.00396	32.088	5.73629e-07	8.16763e-05	5.00396	0	0	0	0	29.0215	35.2468	29.3616
ENST00000535549.5_1	ETS1	ETS1-208	chr11:128328656-128392205	-	protein_coding	5.00395	32.0878	8.8081e-09	7.72082e-06	5.032	0.0280491	0	0.020138	0.039135	30.7974	32.8615	31.5277
ENST00000367976.3_1	CTGF	CTGF-201	chr6:132269316-132272513	-	protein_coding	4.99962	31.9916	3.22929e-06	0.000232731	7.09895	2.09933	2.79148	3.0311	4.14813	136.125	133.691	138.487
ENST00000271064.11_1	TINAGL1	TINAGL1-201	chr1:32042136-32053287	+	protein_coding	4.99466	31.8818	4.68398e-07	7.32733e-05	4.99466	0	0	0	0	27.5061	33.5955	31.8602
ENST00000312562.6_1	FOSL1	FOSL1-201	chr11:65659691-65667997	-	protein_coding	4.95079	30.9268	1.09655e-06	0.000121562	6.04815	1.09736	0.986296	1.09088	1.35855	71.9579	61.132	62.9196
ENST00000368703.6_1	S100A16	S100A16-201	chr1:153579451-153580798	-	protein_coding	4.94567	30.8174	1.55187e-05	0.000608984	4.94567	0	0	0	0	32.5038	36.1071	22.5416
ENST00000568189.5_1	AC140479.5	AC140479.5-201	chr2:111003168-111043433	+	processed_transcript	4.93854	30.6653	7.27797e-09	7.23328e-06	4.96974	0.0311985	0.037026	0.028929	0	29.6026	30.052	31.3795
ENST00000494287.1_1	PLAU	PLAU-204	chr10:75670905-75673511	+	processed_transcript	4.8975	29.8054	1.21761e-05	0.000528431	4.8975	0	0	0	0	26.108	24.4164	37.4302
ENST00000447654.5_1	HMGA1	HMGA1-205	chr6:34204650-34214007	+	protein_coding	4.89618	29.778	0.00226052	0.0149744	7.62908	2.73291	16.0192	4.18558	2.32908	210.844	183.025	198.002
ENST00000442151.6_2	CD44	CD44-211	chr11:35160853-35244867	+	protein_coding	4.86052	29.0511	4.20416e-05	0.00113879	4.86324	0.00272377	0	0	0.00568	28.2114	38.2779	20.4905
ENST00000568293.1_1	MT1E	MT1E-203	chr16:56659693-56661024	+	protein_coding	4.83804	28.602	1.53091e-07	4.09241e-05	4.83804	0	0	0	0	25.4835	27.8215	29.6546
ENST00000564057.1_1	COTL1	COTL1-203	chr16:84599265-84651665	-	protein_coding	4.83068	28.4565	0.0487827	0.124242	8.27781	3.44713	0	37.5717	32.6354	313.11	294.752	320.809
ENST00000394815.2_1	KRT80	KRT80-202	chr12:52562780-52585784	-	protein_coding	4.82688	28.3815	4.1955e-05	0.00113816	4.82688	0	0	0	0	19.5299	29.0578	36.0479
ENST00000437822.6_3	TAF6	TAF6-205	chr7:99704791-99717464	-	protein_coding	4.82364	28.3179	1.01676e-07	3.16298e-05	4.87032	0.0466731	0.077708	0.022466	0	28.7425	26.5419	29.5466
ENST00000404484.8_3	TPM1	TPM1-208	chr15:63340666-63364083	+	protein_coding	4.8128	28.1058	0.011944	0.0465147	6.41658	1.60379	2.07773	5.31193	0.445348	159.354	160.465	23.0765
ENST00000394054.6_1	NFKBIZ	NFKBIZ-203	chr3:101546837-101579866	+	protein_coding	4.81149	28.0804	8.76642e-07	0.000107149	4.84085	0.0293615	0.062958	0	0	27.6097	30.9324	24.762
ENST00000570445.5_1	HMOX2	HMOX2-206	chr16:4526460-4558198	+	protein_coding	4.7923	27.7093	1.25547e-06	0.000130902	4.87745	0.0851476	0	0.193702	0	26.5876	28.1159	30.6176
ENST00000368705.2_1	S100A16	S100A16-203	chr1:153579838-153581820	-	protein_coding	4.78575	27.5838	2.37211e-07	5.08009e-05	4.78575	0	0	0	0	25.9933	24.7697	29.1715
ENST00000439109.6_1	NQO1	NQO1-204	chr16:69744685-69760463	-	protein_coding	4.7783	27.4418	6.40303e-05	0.00149528	4.90931	0.131006	0.313137	0	0	40.4123	26.8008	22.57
ENST00000367157.4_2	NUAK2	NUAK2-201	chr1:205271187-205290919	-	protein_coding	4.77555	27.3895	8.83379e-07	0.00010757	5.56001	0.78446	0.625692	0.610315	0.95204	45.3473	45.4199	47.8048
ENST00000358432.7_1	EPHA2	EPHA2-201	chr1:16450832-16482582	-	protein_coding	4.76903	27.266	4.03256e-07	6.77038e-05	7.12857	2.35954	4.36696	4.31527	3.73827	144.519	129.457	143.328
ENST00000307677.4_1	BCL2L1	BCL2L1-201	chr20:30252255-30310701	-	protein_coding	4.76486	27.1872	0.000670401	0.00663396	5.67632	0.911467	1.45557	1.71009	0	56.3992	37.8866	58.9137
ENST00000372733.3_1	SDC4	SDC4-201	chr20:43953928-43977064	-	protein_coding	4.76471	27.1845	1.81303e-07	4.44311e-05	7.73572	2.97101	6.63678	7.53711	6.39384	211.85	212.149	212.451
ENST00000357037.5_1	CAVIN1	CAVIN1-201	chr17:40554470-40575535	-	protein_coding	4.74622	26.8383	5.33431e-08	2.17855e-05	7.2691	2.52287	4.66247	5.04402	4.54689	154.631	147.791	157.48
ENST00000405885.6_1	IRF1	IRF1-202	chr5:131818778-131825954	-	protein_coding	4.7355	26.6396	1.22656e-07	3.46304e-05	4.7355	0	0	0	0	26.5604	23.6335	26.8464
ENST00000374859.2_1	PSMB9	PSMB9-207	chr6:32821938-32827362	+	protein_coding	4.70629	26.1057	0.000155699	0.00259903	5.33285	0.626558	0	0.6522	1.22728	41.0668	37.7751	39.1374
ENST00000531713.5_2	SLCO2B1	SLCO2B1-215	chr11:74811636-74876875	+	protein_coding	4.70256	26.0382	5.57996e-08	2.19823e-05	4.70256	0	0	0	0	25.6623	23.4396	26.0921
ENST00000415002.6_1	CD59	CD59-203	chr11:33730446-33744256	-	protein_coding	4.70066	26.004	0.00469632	0.0245358	6.86053	2.15986	4.94365	0.669114	7.99524	150.536	67.3174	150.574
ENST00000512729.5_2	TRIML2	TRIML2-207	chr4:189012427-189026747	-	protein_coding	4.6967	25.9326	4.19543e-05	0.00113816	4.6967	0	0	0	0	24.4796	33.9933	18.5597
ENST00000267205.6_1	RHOF	RHOF-201	chr12:122215660-122232168	-	protein_coding	4.69088	25.8283	2.5208e-06	0.000198152	6.44317	1.75229	2.20065	2.04675	2.92103	90.3993	81.3802	86.498
ENST00000257770.7_1	NT5E	NT5E-201	chr6:86159809-86205496	+	protein_coding	4.67771	25.5936	6.09985e-08	2.28772e-05	4.70679	0.029081	0.062338	0	0	23.9245	26.221	25.2499
ENST00000513626.1_1	LUCAT1	LUCAT1-203	chr5:90606838-90610219	-	lincRNA	4.67183	25.4895	7.39412e-08	2.56765e-05	4.70909	0.0372636	0.040469	0	0.03854	25.8453	26.1385	23.563
ENST00000567300.1_1	MT2A	MT2A-205	chr16:56642602-56643409	+	processed_transcript	4.65715	25.2314	0.000117035	0.0021755	4.94954	0.292392	0.836776	0	0	32.1746	32.4411	25.5945
ENST00000376991.6_1	DRAP1	DRAP1-202	chr11:65686806-65688919	+	protein_coding	4.6516	25.1345	0.00596001	0.0288191	5.5199	0.868299	5.08348	0	0	40.5565	50.0177	44.5622
ENST00000376911.1_1	ANXA1	ANXA1-202	chr9:75772570-75785309	+	protein_coding	4.64666	25.0486	7.44516e-05	0.00163915	5.16039	0.513737	0	0.882448	0.546066	38.1157	32.8338	33.5619
ENST00000454962.6_2	SLCO2B1	SLCO2B1-204	chr11:74862258-74917147	+	protein_coding	4.64623	25.0411	1.95716e-07	4.51192e-05	4.64623	0	0	0	0	24.7455	22.0028	25.5143
ENST00000344120.4_1	SPRY4	SPRY4-201	chr5:141689992-141704566	-	protein_coding	4.63205	24.7963	1.89893e-06	0.000170437	4.71797	0.0859147	0.044122	0.037635	0.103552	29.2142	22.4921	24.6812
ENST00000559556.5_1	TPM1	TPM1-220	chr15:63334957-63363421	+	protein_coding	4.62862	24.7373	0.000359707	0.00443074	4.98217	0.353558	0	1.08591	0	22.7639	37.9025	33.1551
ENST00000522226.5_1	TNIP1	TNIP1-214	chr5:150410053-150467221	-	protein_coding	4.61241	24.461	1.25509e-06	0.000130902	4.62348	0.0110742	0.014211	0.008957	0	26.1997	20.6179	24.4709
ENST00000227507.2_1	CCND1	CCND1-201	chr11:69455855-69469242	+	protein_coding	4.60631	24.3577	1.09904e-06	0.000121659	7.62632	3.02002	6.29617	8.15821	6.98804	197.434	196.281	196.041
ENST00000462776.2_2	S100A6	S100A6-203	chr1:153507190-153508467	-	protein_coding	4.60554	24.3447	2.18447e-06	0.000184081	4.60554	0	0	0	0	21.5797	27.4817	21.4352
ENST00000401931.1_1	CXCL8	CXCL8-202	chr4:74606258-74608047	+	protein_coding	4.59875	24.2305	2.62983e-06	0.000202293	4.6116	0.0128458	0	0	0.027072	20.7279	22.5166	27.5954
ENST00000290271.6_1	STC1	STC1-201	chr8:23699428-23712320	-	protein_coding	4.59188	24.1153	2.11682e-07	4.76341e-05	5.16913	0.577257	0.397308	0.616926	0.470051	35.1465	34.3887	35.4135
ENST00000014914.5_1	GPRC5A	GPRC5A-201	chr12:13043716-13070871	+	protein_coding	4.59062	24.0944	5.46394e-07	7.95433e-05	5.79543	1.20481	1.16427	1.41302	1.34518	49.8015	57.3942	56.7495
ENST00000528922.1_1	CD44	CD44-230	chr11:35218709-35220102	+	processed_transcript	4.58925	24.0714	4.0982e-06	0.000272563	4.62563	0.0363853	0	0	0.078597	23.0607	28.0764	20.5038
ENST00000509101.1_1	CXCL1	CXCL1-202	chr4:74735110-74735894	+	processed_transcript	4.56888	23.734	2.04278e-06	0.000177411	4.73172	0.162837	0.159631	0.0274	0.177599	28.8541	23.0196	25.1576
ENST00000536957.5_1	PXN	PXN-207	chr12:120648251-120664647	-	protein_coding	4.55681	23.5362	0.000275558	0.00373732	5.85938	1.30257	0.801036	2.89556	1.13916	65.7238	63.2024	44.6786
ENST00000616760.1_1	CLIC1	CLIC1-210	chr6:31698360-31704322	-	protein_coding	4.55533	23.5121	0.00629989	0.0299047	5.77065	1.21532	0	0.80934	5.91872	59.8947	37.0119	69.2943
ENST00000373808.8_1	GSN	GSN-203	chr9:124030338-124095016	+	protein_coding	4.54417	23.3308	9.29253e-06	0.000449909	4.70597	0.161804	0.006129	0	0.391458	24.2191	26.2065	24.9127
ENST00000228928.11_1	OAS3	OAS3-201	chr12:113376157-113411054	+	protein_coding	4.52911	23.0886	1.32059e-06	0.000134529	5.01673	0.487621	0.458076	0.233734	0.532372	32.0117	30.2151	31.9252
ENST00000372764.3_1	PLAU	PLAU-201	chr10:75670915-75677255	+	protein_coding	4.52127	22.9635	0.000339987	0.00427088	5.24111	0.719836	0	1.55162	0.750897	39.5484	34.0588	37.0557
ENST00000295400.10_1	TGFA	TGFA-201	chr2:70674412-70781147	-	protein_coding	4.50729	22.742	2.50892e-07	5.26273e-05	5.0317	0.524413	0.343326	0.556522	0.423167	31.3697	32.5475	31.2316
ENST00000353172.5_3	KCTD14	KCTD14-201	chr11:77726761-77734340	-	protein_coding	4.5072	22.7406	4.07913e-07	6.81821e-05	4.64055	0.133352	0.182824	0	0.1156	23.604	23.73	24.5039
ENST00000523714.5_1	ANXA6	ANXA6-215	chr5:150480670-150521201	-	protein_coding	4.50595	22.721	0.00513306	0.0260537	4.50595	0	0	0	0	36.8447	6.39468	40.9137
ENST00000243213.1_1	IL13RA2	IL13RA2-201	chrX:114238540-114252207	-	protein_coding	4.50561	22.7155	5.89774e-07	8.31846e-05	4.50561	0	0	0	0	20.8548	24.3344	20.1694
ENST00000435218.6_3	TMEM40	TMEM40-204	chr3:12775415-12800758	-	protein_coding	4.49733	22.5856	2.78845e-06	0.000210837	4.49733	0	0	0	0	20.2595	25.539	19.4201
ENST00000260502.10_1	BCAR3	BCAR3-201	chr1:94027348-94147385	-	protein_coding	4.49639	22.5708	0.00050588	0.0055413	5.59054	1.09415	1.63821	1.98766	0.234453	46.7895	37.9512	59.1041
ENST00000330233.11_1	CRIP1	CRIP1-201	chr14:105952654-105955128	+	protein_coding	4.4686	22.1402	2.36411e-05	0.000784747	4.56859	0.0999964	0.140915	0	0.079077	17.3328	24.511	27.5689
ENST00000011473.6_1	SYPL1	SYPL1-201	chr7:105730951-105753022	-	protein_coding	4.4614	22.0301	2.62169e-07	5.34144e-05	4.4614	0	0	0	0	19.6552	23.0073	20.5614
ENST00000393481.6_1	TES	TES-202	chr7:115862858-115898837	+	protein_coding	4.46003	22.0091	0.00061187	0.00623181	4.46003	0	0	0	0	29.0873	10.6983	29.2902
ENST00000393467.1_1	CAV1	CAV1-202	chr7:116166347-116201230	+	protein_coding	4.4592	21.9965	0.0099706	0.0410836	5.64809	1.18889	2.18326	0.740212	1.13895	93.0184	12.7532	96.525
ENST00000407492.5_2	IL6	IL6-206	chr7:22766833-22771621	+	protein_coding	4.44441	21.7721	1.61243e-05	0.000622245	4.44441	0	0	0	0	22.7548	16.0133	24.5365
ENST00000541996.5_1	YTHDF2	YTHDF2-208	chr1:29063452-29096287	+	protein_coding	4.43958	21.6994	5.00703e-05	0.00127925	4.60104	0.161461	0	0.398987	0	23.8212	28.6621	18.4147
ENST00000635660.1_1	AL359834.1	AL359834.1-201	chr1:200447148-200452732	-	lincRNA	4.41298	21.3029	1.92572e-07	4.51192e-05	4.41298	0	0	0	0	19.8258	22.0655	19.1258
ENST00000473843.1_1	MACF1	MACF1-215	chr1:39900157-39901679	+	processed_transcript	4.4128	21.3003	9.58921e-06	0.000458854	5.61098	1.19817	1.84457	1.00911	1.11367	48.9151	47.153	47.5694
ENST00000311852.10_1	MMP14	MMP14-201	chr14:23305766-23316970	+	protein_coding	4.40916	21.2466	1.4541e-06	0.000144042	5.09193	0.682768	0.734796	0.451948	0.642107	34.8845	30.3205	34.2969
ENST00000331163.10_1	PDGFB	PDGFB-201	chr22:39619364-39640756	-	protein_coding	4.36328	20.5815	4.87362e-07	7.43723e-05	4.5324	0.169123	0.049599	0.195507	0.132811	22.3964	20.7	23.4093
ENST00000210313.7_1	PSMD5	PSMD5-201	chr9:123578331-123605262	-	protein_coding	4.36099	20.549	5.43138e-08	2.18951e-05	4.38407	0.0230732	0.021696	0.02687	0	19.6277	21.0396	19.024
ENST00000495889.5_1	SLCO4A1	SLCO4A1-207	chr20:61298830-61303959	+	processed_transcript	4.36037	20.5401	1.73337e-05	0.000654652	4.58936	0.228984	0.200734	0	0.340745	23.9097	19.2669	26.6341
ENST00000293308.11_2	KRT8	KRT8-201	chr12:53290978-53300402	-	protein_coding	4.35454	20.4572	0.000325131	0.00413945	6.13555	1.78101	4.65448	2.06044	1.34548	65.7122	69.5504	72.8321
ENST00000392623.5_1	S100A13	S100A13-203	chr1:153591280-153599744	-	protein_coding	4.35433	20.4543	0.0219963	0.0712977	6.46726	2.11293	0	3.70691	16.1959	77.2821	109.108	79.359
ENST00000346623.6_1	ALDH1A3	ALDH1A3-202	chr15:101420080-101456831	+	protein_coding	4.34926	20.3825	0.00130224	0.0103096	4.34926	0	0	0	0	8.67786	31.013	26.3319
ENST00000379047.7_1	NQO1	NQO1-203	chr16:69743304-69760571	-	protein_coding	4.34895	20.3782	2.39595e-05	0.000792596	4.37826	0.0293068	0.062837	0	0	25.9503	18.333	16.2623
ENST00000330439.6_1	MT1E	MT1E-202	chr16:56659710-56661024	+	protein_coding	4.34533	20.327	4.21003e-07	6.95984e-05	4.4129	0.0675783	0	0.150878	0	20.1243	19.8819	20.9128
ENST00000632315.1_1	SVIL	SVIL-213	chr10:29754545-29811456	-	protein_coding	4.34152	20.2735	7.07807e-05	0.00158707	4.34152	0	0	0	0	23.7341	22.6721	13.2315
ENST00000248564.5_1	GNG11	GNG11-201	chr7:93551011-93557922	+	protein_coding	4.33752	20.2173	3.69343e-07	6.5477e-05	4.95462	0.617099	0.66526	0.460405	0.48368	28.8246	31.305	29.9473
ENST00000477391.6_1	DBN1	DBN1-207	chr5:176887433-176900614	-	protein_coding	4.32616	20.0587	0.000429662	0.0049769	4.70504	0.378884	1.1987	0	0	26.0212	20.7405	29.2068
ENST00000217131.5_1	CTSZ	CTSZ-201	chr20:57570240-57582302	-	protein_coding	4.31985	19.9712	1.93409e-06	0.000171933	5.96443	1.64457	2.47119	2.20676	1.74571	61.6682	59.3257	63.3967
ENST00000472441.1_1	TM4SF1	TM4SF1-202	chr3:149086810-149093499	-	protein_coding	4.31943	19.9654	3.97765e-07	6.70682e-05	4.31943	0	0	0	0	18.6525	20.846	17.5374
ENST00000256458.4_1	IRAK2	IRAK2-201	chr3:10206549-10285427	+	protein_coding	4.31283	19.8742	1.66092e-06	0.000156313	5.86614	1.55331	1.81408	2.3544	1.67809	58.0066	56.677	57.3102
ENST00000368406.2_1	EFNA1	EFNA1-201	chr1:155100352-155107333	+	protein_coding	4.29481	19.6276	0.00041021	0.00481896	4.68546	0.390646	0.456556	0	0.546898	31.4867	31.8145	14.9816
ENST00000611875.4_2	NPRL3	NPRL3-211	chr16:135819-188859	-	protein_coding	4.28711	19.5231	1.48037e-07	3.99987e-05	4.29175	0.00463843	0	0.009692	0	20.0157	18.2942	17.5294
ENST00000616972.4_1	SEPT2	SEPT2-245	chr2:242255276-242293439	+	protein_coding	4.28485	19.4926	0.00497614	0.0255074	4.28485	0	0	0	0	32.8309	31.4009	5.75674
ENST00000368407.7_1	EFNA1	EFNA1-202	chr1:155099936-155107333	+	protein_coding	4.28482	19.4922	0.000119372	0.0021991	4.85692	0.572095	0.843838	0	0.782094	29.2937	27.6434	27.0452
ENST00000438103.6_1	SBNO2	SBNO2-202	chr19:1107636-1132220	-	protein_coding	4.2795	19.4204	0.00417332	0.0226397	4.2795	0	0	0	0	32.7391	6.09521	29.5968
ENST00000434618.6_1	TAPBP	TAPBP-234	chr6:33267471-33282164	-	protein_coding	4.27467	19.3554	9.37903e-07	0.000110301	6.41225	2.13759	3.0457	3.92896	3.27251	83.8294	84.0083	84.6708
ENST00000354514.5_1	H2AFB2	H2AFB2-201	chrX:154610436-154610783	+	protein_coding	4.27332	19.3374	2.5908e-07	5.30898e-05	4.27332	0	0	0	0	20.0503	17.3792	17.6899
ENST00000522100.5_3	TNIP1	TNIP1-213	chr5:150425427-150466727	-	protein_coding	4.26198	19.1859	1.7652e-07	4.44311e-05	4.26408	0.002107	0	0.004391	0	16.9715	19.5478	18.2089
ENST00000552322.5_1	KRT7	KRT7-212	chr12:52638162-52642639	+	processed_transcript	4.25997	19.1593	1.96513e-07	4.51192e-05	4.25997	0	0	0	0	19.5885	18.0304	16.9499
ENST00000326840.10_1	DCBLD2	DCBLD2-201	chr3:98514785-98620533	-	protein_coding	4.25909	19.1476	1.07626e-07	3.25835e-05	7.81787	3.55879	11.0797	10.2248	11.069	217.075	235.337	221.899
ENST00000394461.2_1	TRIML2	TRIML2-202	chr4:189026567-189030757	-	processed_transcript	4.25	19.0273	6.26826e-07	8.59139e-05	4.25	0	0	0	0	16.1689	18.587	19.4843
ENST00000221132.7_1	TNFRSF10A	TNFRSF10A-201	chr8:23047965-23082639	-	protein_coding	4.24168	18.9179	2.44356e-07	5.20354e-05	4.24168	0	0	0	0	18.1986	19.1656	16.4879
ENST00000225831.4_1	CCL2	CCL2-201	chr17:32582304-32584222	+	protein_coding	4.23782	18.8674	1.27788e-06	0.000131961	4.23782	0	0	0	0	18.4497	15.711	19.6641
ENST00000287842.7_1	NRG1	NRG1-201	chr8:32406153-32621925	+	protein_coding	4.2355	18.8371	9.65384e-06	0.000460016	4.2355	0	0	0	0	20.2897	19.5313	14.2917
ENST00000434178.6_1	MGLL	MGLL-204	chr3:127407909-127542028	-	protein_coding	4.23143	18.784	1.4483e-05	0.000583842	4.72225	0.490818	0.54892	0.484409	0.206897	29.4082	21.5565	25.8136
ENST00000554167.5_1	FRMD6	FRMD6-205	chr14:52164831-52197148	+	protein_coding	4.22415	18.6894	8.91375e-05	0.00183524	4.58418	0.360035	0.838695	0.074196	0.070411	21.9654	24.6546	22.4256
ENST00000356819.7_1	NRG1	NRG1-202	chr8:32405785-32625477	+	protein_coding	4.20602	18.456	8.91678e-06	0.000440422	4.22133	0.0153132	0.024472	0.007695	0	15.7906	15.9069	21.8616
ENST00000559255.1_2	TNFAIP2	TNFAIP2-204	chr14:103599085-103603019	+	protein_coding	4.2052	18.4455	2.39589e-06	0.000193582	4.26724	0.0620447	0.137711	0	0	19.6742	16.1124	19.1819
ENST00000389805.8_1	SQSTM1	SQSTM1-202	chr5:179247759-179265078	+	protein_coding	4.19639	18.3332	0.00207883	0.0141219	6.12683	1.93044	2.25163	3.07941	3.17504	97.2369	109.714	30.3762
ENST00000221847.5_1	EBI3	EBI3-201	chr19:4229495-4237528	+	protein_coding	4.19217	18.2797	3.13086e-06	0.000227595	4.36947	0.1773	0.252115	0.154712	0	19.7103	18.1905	21.2203
ENST00000506179.5_3	UGDH	UGDH-205	chr4:39500408-39528177	-	protein_coding	4.18972	18.2487	5.37528e-08	2.17855e-05	4.19398	0.00425534	0.008888	0	0	16.9594	18.3432	16.6489
ENST00000613079.4_1	ELFN2	ELFN2-207	chr22:37764001-37823505	-	protein_coding	4.1894	18.2446	3.02455e-08	1.5873e-05	4.1894	0	0	0	0	17.6656	16.3738	17.727
ENST00000191018.9_1	CTSA	CTSA-201	chr20:44519980-44527459	+	protein_coding	4.17273	18.035	9.20144e-06	0.000448378	4.20464	0.0319113	0.034153	0.033318	0	21.4109	14.9433	16.544
ENST00000497282.1_1	EFNA1	EFNA1-205	chr1:155103680-155106601	+	processed_transcript	4.17121	18.016	3.70712e-05	0.00104862	4.56329	0.39208	0.106658	0.720454	0.186936	23.418	20.5518	24.1112
ENST00000378024.8_3	AHNAK	AHNAK-202	chr11:62283377-62314307	-	protein_coding	4.16866	17.9842	6.19567e-08	2.30628e-05	7.8107	3.64204	12.0556	11.5091	10.9143	227.946	218.499	224.217
ENST00000409385.5_1	SPATS2L	SPATS2L-206	chr2:201170882-201343252	+	protein_coding	4.16056	17.8835	2.01795e-06	0.00017627	4.16056	0	0	0	0	14.941	19.2683	16.7022
ENST00000379440.8_2	PRNP	PRNP-201	chr20:4666882-4682236	+	protein_coding	4.16035	17.8809	8.97803e-05	0.00184213	6.16616	2.00581	1.95835	3.86462	3.50118	58.6404	79.1842	76.4403
ENST00000341049.6_1	CAV1	CAV1-201	chr7:116164839-116201230	+	protein_coding	4.15633	17.8312	0.0218293	0.0708936	4.37421	0.217878	3.8e-05	0.317434	0.194038	7.89766	98.6863	9.0552
ENST00000318407.4_1	BOK	BOK-201	chr2:242498136-242513553	+	protein_coding	4.1473	17.7199	1.44684e-06	0.000143512	4.47104	0.323741	0.367365	0.161098	0.234849	22.1973	19.3789	22.0747
ENST00000373087.6_1	ZC3H12A	ZC3H12A-201	chr1:37940153-37949980	+	protein_coding	4.13929	17.6218	1.23786e-05	0.000532921	5.57548	1.43619	1.26195	2.21027	1.72888	47.8001	49.4239	43.066
ENST00000244601.3	HIST1H2BG	HIST1H2BG-001	chr6:26216428-26216872	-	protein_coding	4.13884	17.6164	0.000106665	0.0020528	7.4223	3.28346	5.94925	8.99787	12.2866	170.395	169.458	171.74
ENST00000344849.4_1	ENG	ENG-201	chr9:130577296-130616915	-	protein_coding	4.13738	17.5984	8.14178e-06	0.000415715	4.30722	0.169839	0.129296	0.260586	0	20.7601	16.1985	19.7325
ENST00000265361.7_1	SEMA3C	SEMA3C-201	chr7:80371854-80548667	-	protein_coding	4.1338	17.5548	4.99426e-07	7.49974e-05	5.61861	1.48481	1.76492	1.61498	2.03227	46.607	50.323	47.5429
ENST00000474413.5_1	EFNA1	EFNA1-204	chr1:155102038-155106783	+	processed_transcript	4.13082	17.5187	0.00344417	0.0197983	4.13515	0.00433065	0.009046	0	0	28.9818	24.835	6.00403
ENST00000617811.4_1	HNF1B	HNF1B-204	chr17:36046435-36105238	-	protein_coding	4.12658	17.4673	1.27753e-08	9.37277e-06	4.12658	0	0	0	0	16.3269	15.9699	17.1249
ENST00000301464.3_1	IGFBP6	IGFBP6-201	chr12:53491229-53496124	+	protein_coding	4.12543	17.4534	3.43477e-06	0.000241813	4.65302	0.52759	0.577656	0.239024	0.532391	24.5001	23.185	24.8233
ENST00000500112.2_2	CASC19	CASC19-201	chr8:128216657-128231483	-	lincRNA	4.12279	17.4214	0.000240952	0.00342392	4.12279	0	0	0	0	21.0076	20.8422	9.99968
ENST00000064724.7_1	CLDN11	CLDN11-201	chr3:170136653-170151887	+	protein_coding	4.11473	17.3243	3.08588e-08	1.59333e-05	4.13718	0.0224526	0	0	0.047796	16.9915	15.9624	16.8522
ENST00000533432.5_1	CSRP1	CSRP1-219	chr1:201453491-201475967	-	protein_coding	4.11202	17.2919	0.0155427	0.0560775	4.12991	0.0178878	0.037897	0	0	35.745	33.1153	3.28089
ENST00000396505.6_1	DKK3	DKK3-202	chr11:11984653-12030629	-	protein_coding	4.10849	17.2496	7.27429e-06	0.000386717	4.84632	0.737827	0.569995	0.628326	0.814196	28.5862	23.5691	31.7481
ENST00000400068.7_2	SIRPA	SIRPA-203	chr20:1874813-1920540	+	protein_coding	4.10247	17.1777	2.85995e-06	0.000214007	5.37511	1.27264	1.37228	1.48137	1.39583	43.7454	34.8254	43.5932
ENST00000260526.10_1	ARHGAP29	ARHGAP29-201	chr1:94637307-94703121	-	protein_coding	4.10137	17.1647	7.89858e-06	0.000406712	6.67405	2.57268	4.91271	4.44661	5.53808	86.7708	114.64	103.908
ENST00000434325.6_1	PLPP2	PLPP2-203	chr19:281040-291504	-	protein_coding	4.09068	17.038	3.62877e-06	0.000252104	4.09622	0.00554251	0	0	0.011592	17.0575	17.931	13.6361
ENST00000313234.9_1	KRT80	KRT80-201	chr12:52562780-52585784	-	protein_coding	4.08932	17.0219	1.2381e-06	0.000129809	4.08932	0	0	0	0	14.5445	18.0879	15.6222
ENST00000461614.1_1	EPHA2	EPHA2-202	chr1:16474873-16482547	-	processed_transcript	4.08755	17.0011	8.75533e-08	2.84848e-05	4.08755	0	0	0	0	16.6646	14.9838	16.4037
ENST00000615917.4_1	EI24	EI24-212	chr11:125439354-125453922	+	protein_coding	4.08247	16.9413	0.0165988	0.0586303	5.1072	1.02473	7.42209	0	0	34.5328	29.2488	37.0999
ENST00000432045.6_1	AC016831.1	AC016831.1-201	chr7:130561568-130598069	-	lincRNA	4.07555	16.8602	2.76766e-07	5.53415e-05	4.58869	0.513141	0.443401	0.443888	0.394736	24.2781	23.7811	21.2399
ENST00000442046.5_1	MACF1	MACF1-207	chr1:39926419-39952659	+	protein_coding	4.0665	16.7547	0.00727448	0.0330425	4.66621	0.599713	0.5378	0.648431	0.372853	7.35698	40.88	45.7683
ENST00000520358.6_1	TSPAN18	TSPAN18-207	chr11:44748662-44952883	+	protein_coding	4.0553	16.6252	1.29305e-06	0.0001328	6.65407	2.59877	5.7653	4.80455	4.66069	101.973	95.0184	102.312
ENST00000562684.5_1	JPT2	JPT2-206	chr16:1728278-1751491	+	protein_coding	4.04977	16.5616	0.0079381	0.0350806	5.30714	1.25738	0.081289	5.75913	0.86935	51.8379	39.7063	27.8549
ENST00000299964.3_1	NNMT	NNMT-201	chr11:114166547-114183282	+	protein_coding	4.03909	16.4395	8.34261e-05	0.00175867	4.1448	0.105707	0	0.170473	0.064391	20.498	11.7192	19.2428
ENST00000056217.9_1	ARHGEF5	ARHGEF5-201	chr7:144052433-144077725	+	protein_coding	4.03763	16.4228	2.94399e-08	1.56289e-05	4.04654	0.00890975	0	0	0.0187	15.0995	15.2144	16.2853
ENST00000455547.5_1	EIF3D	EIF3D-206	chr22:36914860-36925213	-	protein_coding	4.02413	16.2698	0.00147109	0.0111757	5.10617	1.08204	1.3739	1.73158	0.463197	47.211	17.7532	44.197
ENST00000489344.5_1	RBM3	RBM3-208	chrX:48432912-48436123	+	processed_transcript	4.01367	16.1523	0.0254607	0.078897	6.20506	2.19139	4.32338	10.5467	0.550143	122.17	130.802	23.7341
ENST00000377482.9_1	ERRFI1	ERRFI1-201	chr1:8071779-8086368	-	protein_coding	4.00706	16.0785	1.55068e-06	0.000149103	7.22153	3.21446	8.18161	7.83241	8.86171	139.096	141.878	165.073
ENST00000346786.2_1	MYL9	MYL9-202	chr20:35169900-35178228	+	protein_coding	4.0047	16.0522	5.3136e-08	2.17855e-05	4.0047	0	0	0	0	15.4646	15.5157	14.2109
ENST00000569778.1_1	AC026461.3	AC026461.3-201	chr16:56643413-56645287	-	lincRNA	4.0006	16.0066	5.95005e-06	0.000336413	4.0006	0	0	0	0	17.5047	15.2126	12.6699
ENST00000381287.8_1	IL6ST	IL6ST-203	chr5:55230953-55272142	-	protein_coding	3.99504	15.9451	0.0100097	0.0411773	4.85333	0.858282	0	4.95807	0	29.866	31.3194	23.2129
ENST00000624705.1_1	AC109326.1	AC109326.1-201	chr17:41437409-41438729	-	TEC	3.99257	15.9179	7.80212e-08	2.64935e-05	4.01515	0.0225784	0.04807	0	0	15.4417	15.7044	14.391
ENST00000409724.5_1	CAPG	CAPG-204	chr2:85622016-85641197	-	protein_coding	3.99017	15.8914	2.84617e-05	0.000881855	4.04516	0.0549837	0.121128	0	0	13.5689	13.6036	20.1473
ENST00000620204.3_1	TNFAIP3	TNFAIP3-210	chr6:138192348-138203885	+	protein_coding	3.98967	15.8859	4.18424e-05	0.00113749	5.03309	1.04341	1.33191	0.564727	1.39963	29.483	32.5217	33.3515
ENST00000592169.2_1	PSME3	PSME3-213	chr17:40985513-40993688	+	protein_coding	3.98572	15.8424	0.000246391	0.00346788	3.98572	0	0	0	0	9.2076	20.1857	17.3864
ENST00000489304.5_1	CD40	CD40-206	chr20:44746990-44758502	+	processed_transcript	3.98472	15.8314	0.0029521	0.0178247	3.98472	0	0	0	0	14.2581	32.7833	6.69761
ENST00000372164.7_1	TSPAN14	TSPAN14-206	chr10:82214086-82282387	+	protein_coding	3.98293	15.8118	0.00782744	0.0347362	4.78918	0.806245	0	4.34702	0	27.4712	25.9522	26.5461
ENST00000561491.1_1	MT2A	MT2A-202	chr16:56642518-56643406	+	protein_coding	3.97949	15.7741	5.33652e-08	2.17855e-05	4.0621	0.0826157	0.0556	0.026737	0.095597	15.8277	16.1907	15.1112
ENST00000442218.2_1	SLC48A1	SLC48A1-201	chr12:48166991-48176536	+	protein_coding	3.97811	15.759	5.75842e-05	0.00138982	6.19398	2.21588	3.88013	2.4927	4.88227	72.792	69.0573	74.9037
ENST00000263097.8_1	CNN2	CNN2-201	chr19:1026580-1039067	+	protein_coding	3.96754	15.6441	0.00154412	0.0115247	5.29835	1.33081	3.20795	1.18808	0.728652	23.4251	47.1	50.8688
ENST00000230990.6_1	HBEGF	HBEGF-201	chr5:139712428-139726216	-	protein_coding	3.967	15.6382	5.57057e-07	8.04467e-05	5.62115	1.65415	2.32739	2.27573	1.86044	48.1352	48.1946	48.3278
ENST00000368450.5_1	SHC1	SHC1-204	chr1:154934774-154946852	-	protein_coding	3.96677	15.6356	7.68295e-06	0.00039998	5.59708	1.63031	2.19512	2.34613	1.77518	43.0624	54.9672	44.9903
ENST00000443980.6_1	NECAP2	NECAP2-202	chr1:16767231-16786572	+	protein_coding	3.96559	15.6229	1.54897e-05	0.00060848	4.05249	0.0868997	0	0	0.198059	17.0278	17.3739	12.7918
ENST00000378115.2_1	ARHGEF35	ARHGEF35-201	chr7:143883176-143892748	-	protein_coding	3.95389	15.4967	1.02534e-08	8.29101e-06	3.95389	0	0	0	0	14.2539	14.199	15.0516
ENST00000439696.2_1	ZFP36L1	ZFP36L1-202	chr14:69254379-69259957	-	protein_coding	3.95385	15.4963	7.7354e-05	0.00167951	7.24309	3.28924	6.2142	9.18425	11.7164	152.658	147.581	151.281
ENST00000522111.2_3	TRNP1	TRNP1-201	chr1:27320198-27327389	+	protein_coding	3.94621	15.4145	2.67505e-07	5.43546e-05	6.25082	2.30461	3.72426	4.2451	3.86611	76.731	71.4926	77.3731
ENST00000443882.1	CT45A3	CT45A3-201	chrX:134887233-134891519	+	protein_coding	3.9459	15.4111	3.05983e-07	5.91442e-05	3.9459	0	0	0	0	14.3947	15.5574	13.3595
ENST00000306376.9_1	ETV5	ETV5-201	chr3:185764097-185826901	-	protein_coding	3.94155	15.3647	1.19337e-09	3.36381e-06	4.282	0.340453	0.268928	0.268677	0.260874	18.1037	18.7778	18.4867
ENST00000451793.1_1	SLCO4A1	SLCO4A1-203	chr20:61299165-61303645	+	protein_coding	3.93686	15.3149	0.000776741	0.0072928	4.58843	0.651571	0.412579	1.74419	0	23.7288	23.1904	22.2765
ENST00000264908.10_1	ANXA3	ANXA3-201	chr4:79472673-79531575	+	protein_coding	3.9339	15.2834	4.39398e-05	0.0011721	4.93912	1.00522	1.65812	0.720012	0.768878	28.3421	30.6325	30.106
ENST00000566118.5_2	HAS3	HAS3-203	chr16:69140512-69148300	+	protein_coding	3.92575	15.1974	1.93123e-06	0.000171882	3.92575	0	0	0	0	15.6241	12.3978	14.7592
ENST00000269593.4_1	IGFBP4	IGFBP4-201	chr17:38599713-38613983	+	protein_coding	3.91951	15.1317	1.35244e-05	0.000559258	4.67049	0.750981	0.899889	0.814133	0.38295	25.7471	22.7188	25.0316
ENST00000586949.1_1	AC090409.1	AC090409.1-202	chr18:59273301-59274149	-	lincRNA	3.9077	15.0085	3.77204e-05	0.00106141	3.9077	0	0	0	0	12.4849	18.6694	11.7459
ENST00000560869.5_2	TNFAIP2	TNFAIP2-209	chr14:103589798-103603776	+	protein_coding	3.90458	14.976	5.52071e-07	8.00333e-05	4.16479	0.260204	0.113592	0.281374	0.203886	17.4922	17.2399	16.1066
ENST00000612341.4_3	SMTN	SMTN-222	chr22:31480982-31500609	+	protein_coding	3.90239	14.9533	0.00576694	0.0281637	4.64316	0.74077	3.52682	0.001857	0.028924	26.187	25.1781	20.9226
ENST00000640140.1_1	FAS	FAS-218	chr10:90762511-90775289	+	processed_transcript	3.89414	14.868	0.000579586	0.00602655	3.89414	0	0	0	0	17.2833	19.7329	7.67042
ENST00000517845.5_2	WASHC5	WASHC5-202	chr8:126036509-126104025	-	protein_coding	3.88407	14.7646	0.00568629	0.0279054	4.59495	0.71088	0	0	3.38519	22.7171	20.4455	26.7493
ENST00000592280.1_1	MOB3A	MOB3A-209	chr19:2073136-2078718	-	protein_coding	3.88331	14.7569	0.000674943	0.00665764	5.14265	1.25934	0.935086	0.702626	3.16368	33.1757	32.6412	37.3432
ENST00000344206.8_1	MST1R	MST1R-202	chr3:49924598-49941042	-	protein_coding	3.88171	14.7404	3.89666e-12	9.79153e-08	3.88171	0	0	0	0	13.7947	13.7533	13.6735
ENST00000395884.3_1	KLF10	KLF10-202	chr8:103661014-103666603	-	protein_coding	3.88033	14.7264	0.0181015	0.0623271	5.15663	1.27629	0.240953	8.6747	0.183626	34.616	39.4162	30.5281
ENST00000482481.1_1	ARHGAP29	ARHGAP29-203	chr1:94642169-94661496	-	processed_transcript	3.87798	14.7024	7.75605e-05	0.00168302	4.86599	0.988004	0.649564	1.53913	0.862955	33.1102	28.9443	23.2787
ENST00000296031.4_1	CXCL2	CXCL2-201	chr4:74963393-74964912	-	processed_transcript	3.87671	14.6894	0.000101118	0.00198526	4.08321	0.206507	0	0.370386	0.121118	20.2145	11.8573	16.8536
ENST00000375425.9_1	NELFE	NELFE-201	chr6:31920006-31926629	-	protein_coding	3.87544	14.6765	1.86702e-06	0.000168672	3.87544	0	0	0	0	15.3734	12.1403	13.6934
ENST00000348715.9_1	PAX8	PAX8-203	chr2:113973574-114036488	-	protein_coding	3.87497	14.6717	1.86946e-05	0.000682127	3.87497	0	0	0	0	17.3649	12.4453	11.7905
ENST00000393578.7_2	HMGA2	HMGA2-203	chr12:66218240-66237303	+	protein_coding	3.86766	14.5976	0.000112333	0.00211991	4.2951	0.427446	0	0.746795	0.392452	20.8183	16.0668	19.3184
ENST00000319397.6_1	ETS1	ETS1-201	chr11:128331661-128392199	-	protein_coding	3.86486	14.5693	2.83824e-05	0.000880485	3.86486	0	0	0	0	16.2326	14.7417	10.4003
ENST00000275493.6_1	EGFR	EGFR-201	chr7:55086794-55279321	+	protein_coding	3.86431	14.5637	1.80538e-05	0.000670096	6.45946	2.59516	5.17397	4.74908	5.21579	96.7594	97.5221	69.7593
ENST00000443439.6_2	ERAP1	ERAP1-202	chr5:96110188-96143612	-	protein_coding	3.86011	14.5214	1.82317e-05	0.00067339	4.97364	1.11354	1.20626	1.53405	0.81197	31.3479	27.2224	32.9789
ENST00000615853.1_1	H2AFB3	H2AFB3-201	chrX:154689076-154689666	-	protein_coding	3.8483	14.403	8.51838e-07	0.000105443	3.90468	0.0563843	0	0	0.124398	14.6255	13.0027	14.3546
ENST00000279488.7_1	DUSP6	DUSP6-201	chr12:89741009-89747048	-	protein_coding	3.84764	14.3964	1.26907e-06	0.000131592	4.10798	0.260344	0.33102	0.107864	0.165314	16.2603	16.7429	15.7419
ENST00000615353.1_1	HIST1H4I	HIST1H4I-201	chr6:27106367-27107660	+	protein_coding	3.83615	14.2822	7.10094e-07	9.32256e-05	4.77537	0.939222	0.901257	0.787403	1.07462	26.8868	25.1239	27.1939
ENST00000441606.2_1	ANO6	ANO6-205	chr12:45686466-45826134	+	protein_coding	3.83336	14.2546	0.0292753	0.0870521	3.89691	0.0635523	0.070323	0.020666	0.044708	31.8235	2.01189	32.4378
ENST00000284273.5_1	UBASH3B	UBASH3B-201	chr11:122526383-122685181	+	protein_coding	3.82426	14.165	2.98501e-07	5.82958e-05	5.61093	1.78667	2.23367	2.59147	2.53634	47.6244	49.9149	46.149
ENST00000309195.9_3	PTGR1	PTGR1-201	chr9:114325247-114361687	-	protein_coding	3.81848	14.1083	4.4233e-07	7.10915e-05	3.81848	0	0	0	0	14.3671	12.7264	12.3131
ENST00000308831.6_1	RHOD	RHOD-201	chr11:66824289-66839484	+	protein_coding	3.81816	14.1052	1.96598e-06	0.000173481	3.89812	0.0799598	0	0	0.180894	13.7087	14.8106	13.2505
ENST00000339464.8_1	WNT7B	WNT7B-201	chr22:46316242-46373009	-	protein_coding	3.8104	14.0296	1.11003e-09	3.34714e-06	4.35241	0.542013	0.453226	0.43877	0.476258	19.5517	19.1741	19.5578
ENST00000515676.5_1	CCT5	CCT5-214	chr5:10250649-10265014	+	protein_coding	3.80819	14.0081	0.00481685	0.0249597	7.59815	3.78996	8.82695	33.6902	6.7634	186.828	210.025	182.537
ENST00000262888.7_1	KCNN4	KCNN4-201	chr19:44270685-44285409	-	protein_coding	3.79757	13.9054	2.51062e-07	5.26273e-05	3.84616	0.0485909	0	0.058166	0.04551	12.5059	14.1431	13.5443
ENST00000565835.5_1	ATP6V0D1	ATP6V0D1-211	chr16:67472224-67514982	-	protein_coding	3.79516	13.8822	0.0265188	0.0811515	4.83477	1.03961	0	0	7.68678	20.8812	21.0344	47.2012
ENST00000390645.2_1	ARL4C	ARL4C-202	chr2:235401685-235405697	-	protein_coding	3.78858	13.8189	0.0210925	0.0692273	5.00212	1.21355	1.43499	1.26562	1.26078	62.1233	6.71917	66.5468
ENST00000492843.5_1	PRKAG2	PRKAG2-215	chr7:151253247-151433400	-	protein_coding	3.78785	13.812	0.0080763	0.0355041	5.29264	1.50479	0	4.81106	2.93283	35.2082	42.6165	37.1309
ENST00000510619.2_1	AL133330.1	AL133330.1-201	chr11:35234097-35235554	+	sense_intronic	3.78442	13.7792	8.18842e-06	0.000416797	3.78442	0	0	0	0	12.5377	15.2296	10.9073
ENST00000253270.11_1	SLC35D2	SLC35D2-201	chr9:99082988-99145979	-	protein_coding	3.78435	13.7785	2.51324e-07	5.26273e-05	3.83002	0.0456631	0	0.099608	0	12.8441	13.0434	13.7949
ENST00000329841.9_1	ALDH1A3	ALDH1A3-201	chr15:101419581-101456831	+	protein_coding	3.77833	13.7212	2.54743e-05	0.000822982	5.38789	1.60956	2.41163	1.88597	1.88617	50.5539	35.6159	37.8884
ENST00000550153.1_1	KRT7	KRT7-209	chr12:52641442-52642705	+	processed_transcript	3.77791	13.7172	5.77486e-05	0.00139173	3.77791	0	0	0	0	15.1838	14.5753	9.23951
ENST00000549369.5_1	NAV3	NAV3-206	chr12:78334047-78344675	+	processed_transcript	3.77463	13.686	7.37721e-07	9.50638e-05	3.77463	0	0	0	0	12.8113	13.8256	11.5194
ENST00000557904.5_1	ANXA2	ANXA2-206	chr15:60656628-60695082	-	protein_coding	3.77199	13.661	0.000235399	0.00338264	4.79623	1.02424	0.452243	1.66005	1.17799	29.5504	21.3261	30.4486
ENST00000361545.9_1	CLIP2	CLIP2-202	chr7:73703805-73820260	+	protein_coding	3.77088	13.6505	3.80692e-06	0.000259008	4.45872	0.687839	0.595415	0.817571	0.441503	22.0237	19.7343	21.272
ENST00000442011.6_1	TGFBI	TGFBI-201	chr5:135364584-135399506	+	protein_coding	3.76995	13.6417	5.24879e-05	0.00131453	3.76995	0	0	0	0	17.1027	11.2514	10.4465
ENST00000614313.4_1	HNF1B	HNF1B-202	chr17:36047245-36105009	-	protein_coding	3.75452	13.4966	5.2773e-07	7.79084e-05	3.75452	0	0	0	0	13.7343	11.7117	12.126
ENST00000368453.8_1	SHC1	SHC1-205	chr1:154934774-154946852	-	protein_coding	3.74977	13.4522	5.09625e-06	0.00030957	5.36185	1.61208	2.29817	2.26909	1.64945	41.0914	41.9191	37.494
ENST00000343218.9_3	DPYSL3	DPYSL3-201	chr5:146770375-146889619	-	protein_coding	3.74868	13.442	0.00166974	0.0121533	4.18997	0.441292	0.475117	0.279352	0.326508	12.3484	11.5872	35.1877
ENST00000341259.6_1	SH2B3	SH2B3-201	chr12:111843752-111889427	+	protein_coding	3.73586	13.3231	1.45614e-07	3.95014e-05	6.09534	2.35949	3.98775	4.43762	3.98328	69.3364	66.0947	66.7293
ENST00000532401.1_1	FOSL1	FOSL1-204	chr11:65660116-65667890	-	protein_coding	3.73526	13.3176	0.000566379	0.0059343	3.73526	0	0	0	0	7.01919	17.8634	14.6143
ENST00000415949.5_1	SEC61G	SEC61G-203	chr7:54819946-54827667	-	protein_coding	3.7313	13.2811	2.70089e-05	0.000857278	4.0973	0.366003	0.186783	0.370518	0.316066	19.8107	16.0427	13.1386
ENST00000340160.7_1	TSPAN18	TSPAN18-201	chr11:44785976-44953972	+	protein_coding	3.72804	13.2511	9.10443e-07	0.000109008	5.1283	1.40026	1.41721	1.81759	1.70002	35.0109	32.4414	34.53
ENST00000523175.5_1	HAVCR1	HAVCR1-205	chr5:156456437-156485966	-	protein_coding	3.72554	13.2282	9.56492e-05	0.00191662	3.72554	0	0	0	0	13.301	15.7727	8.65012
ENST00000334801.7_1	BCL9L	BCL9L-201	chr11:118764584-118781613	-	protein_coding	3.72324	13.2071	9.33967e-05	0.00188706	5.14355	1.42031	1.18672	1.38289	2.67935	34.7471	32.6206	35.749
ENST00000336949.6_1	MID1IP1	MID1IP1-201	chrX:38662986-38665790	+	protein_coding	3.715	13.1319	0.00113529	0.00939641	4.97667	1.26167	0.304671	2.53349	1.99016	31.5827	28.9348	31.0051
ENST00000544848.2_1	H2AFJ	H2AFJ-203	chr12:14927317-14927960	+	protein_coding	3.71014	13.0877	4.1557e-05	0.00113259	5.71146	2.00133	2.12073	3.65463	3.4181	54.6844	47.2709	52.5235
ENST00000451137.6_1	CYR61	CYR61-201	chr1:86046444-86049645	+	protein_coding	3.70095	13.0046	4.73242e-07	7.33285e-05	8.22419	4.52324	23.4685	22.4138	20.2234	298.723	293.103	302.365
ENST00000357339.6_1	FAS	FAS-205	chr10:90750535-90774207	+	protein_coding	3.69954	12.9919	6.83264e-05	0.0015549	3.69954	0	0	0	0	8.64458	13.6699	14.4992
ENST00000372285.7_1	CD40	CD40-202	chr20:44746911-44758502	+	protein_coding	3.69814	12.9793	0.00115832	0.00953467	4.7642	1.06605	1.30411	1.70262	0.473854	23.6051	17.6636	42.6998
ENST00000367342.8_1	INAVA	INAVA-201	chr1:200860469-200884863	+	protein_coding	3.68816	12.8898	6.71705e-06	0.000367192	4.47857	0.790418	0.630564	0.868668	0.698042	24.0786	21.6422	18.5134
ENST00000368299.7_1	LMNA	LMNA-205	chr1:156084513-156109108	+	protein_coding	3.68798	12.8882	0.0252227	0.0783626	3.68798	0	0	0	0	12.2645	2.56763	44.2379
ENST00000615897.1_1	AC107308.1	AC107308.1-201	chr12:66224530-66224830	+	sense_intronic	3.68104	12.8264	0.000566491	0.00593446	4.40372	0.722678	0.095235	1.20485	0.861045	16.8678	27.2328	17.7987
ENST00000538545.6_1	ACTN1	ACTN1-205	chr14:69341576-69445793	-	protein_coding	3.68055	12.822	0.00582292	0.0283581	3.75549	0.0749391	0.002838	0.100676	0.058733	10.7913	31.6117	5.40629
ENST00000368076.1_1	PEA15	PEA15-202	chr1:160175211-160185166	+	protein_coding	3.68004	12.8175	0.00118411	0.00967511	4.31833	0.638283	0.299959	0.311252	1.21213	31.0317	12.3671	17.5447
ENST00000359209.10_1	KIRREL1	KIRREL1-201	chr1:157963400-158065443	+	protein_coding	3.67459	12.7692	3.92686e-06	0.000264306	5.99918	2.32458	4.40732	3.68625	3.96023	66.5347	55.8038	67.2169
ENST00000328159.8_1	TPM3	TPM3-205	chr1:154129170-154155595	-	protein_coding	3.67337	12.7583	0.000909153	0.0080947	6.11014	2.43677	5.17578	3.27462	5.0122	109.041	43.2749	66.6539
ENST00000359013.4_1	TGFBR2	TGFBR2-202	chr3:30648093-30735634	+	protein_coding	3.67039	12.7321	8.17302e-08	2.73829e-05	3.8191	0.14871	0.070998	0.151081	0.105107	12.8384	12.8911	13.6276
ENST00000354880.9_1	CTSA	CTSA-202	chr20:44519961-44527459	+	protein_coding	3.66866	12.7168	2.87119e-10	1.66494e-06	3.66866	0	0	0	0	11.8805	11.6786	11.593
ENST00000262435.13_1	SMURF2	SMURF2-201	chr17:62541483-62658186	-	protein_coding	3.66663	12.6989	0.00238832	0.0155288	6.57697	2.91034	10.5667	9.23167	2.59038	93.5997	92.6788	97.1886
ENST00000295927.3_1	PTX3	PTX3-201	chr3:157154578-157161417	+	protein_coding	3.64997	12.5531	1.84481e-07	4.44311e-05	5.88063	2.23066	3.42415	3.96384	3.70807	57.7943	58.3829	57.5795
ENST00000308807.11_1	MLKL	MLKL-202	chr16:74705759-74734812	-	protein_coding	3.64701	12.5273	2.53476e-06	0.000199042	3.66732	0.0203137	0.043146	0	0	12.5263	10.2017	12.535
ENST00000502536.5_1	OSMR	OSMR-202	chr5:38845960-38886759	+	protein_coding	3.64118	12.4768	8.91523e-05	0.00183524	4.0689	0.427727	0.712421	0	0.421234	15.8454	15.7356	15.7673
ENST00000344548.7_4	CDC42	CDC42-202	chr1:22379161-22419439	+	protein_coding	3.62716	12.3562	0.00649527	0.0305166	5.96668	2.33951	1.39136	3.34521	11.4777	60.9018	62.6452	61.0837
ENST00000013807.9_1	ERCC1	ERCC1-201	chr19:45916692-45926824	-	protein_coding	3.61087	12.2174	1.63325e-05	0.000628489	4.82395	1.21308	1.01575	1.41622	1.55828	29.6074	29.2862	23.5125
ENST00000519387.1_3	LY6K	LY6K-203	chr8:143781532-143784872	+	protein_coding	3.60459	12.1644	0.000142441	0.00246053	3.60459	0	0	0	0	13.032	7.57452	13.9604
ENST00000451037.6_1	CA10	CA10-203	chr17:49707684-50236087	-	protein_coding	3.6002	12.1274	1.47791e-06	0.000144689	3.6002	0	0	0	0	11.5193	12.0909	9.88314
ENST00000473756.1_1	LINC00973	LINC00973-201	chr3:98699902-98701940	+	lincRNA	3.60008	12.1264	3.54352e-07	6.46791e-05	3.60008	0	0	0	0	11.5256	10.2222	11.6857
ENST00000421017.6_1	ANXA2	ANXA2-203	chr15:60639541-60690185	-	protein_coding	3.59474	12.0816	1.17191e-05	0.000513921	8.29734	4.7026	29.9484	24.2395	21.6024	317.09	304.043	319.873
ENST00000264205.10_2	ECE1	ECE1-201	chr1:21546430-21616750	-	protein_coding	3.58947	12.0376	8.55892e-06	0.000428993	5.65701	2.06753	2.77869	3.75625	3.09791	49.304	45.0484	54.4585
ENST00000317734.12_1	SLC35C2	SLC35C2-202	chr20:44978169-44993097	-	protein_coding	3.5865	12.0128	6.97422e-07	9.22407e-05	3.60338	0.0168752	0.020155	0.013313	0.001913	10.2658	12.1904	11.0823
ENST00000277480.6_3	LCN2	LCN2-201	chr9:130911732-130915734	+	protein_coding	3.58647	12.0125	9.72485e-05	0.00193787	3.58647	0	0	0	0	9.18088	9.31789	15.5017
ENST00000416836.5_1	PLCB4	PLCB4-207	chr20:9147005-9318668	+	protein_coding	3.58621	12.0104	1.12539e-05	0.00050208	3.73932	0.153108	0.235874	0	0.112489	13.1603	10.6391	13.4528
ENST00000216117.8_1	HMOX1	HMOX1-201	chr22:35776828-35790207	+	protein_coding	3.58503	12.0006	2.75181e-07	5.52176e-05	7.49998	3.91495	13.7706	14.9092	13.605	184.398	171.339	184.638
ENST00000354287.4_1	FBXO2	FBXO2-201	chr1:11708424-11714739	-	protein_coding	3.58402	11.9922	1.99973e-05	0.000710068	5.0048	1.42078	1.95459	1.96442	1.19105	33.2402	29.2383	30.966
ENST00000571572.2_1	PIMREG	PIMREG-204	chr17:6350815-6353915	+	protein_coding	3.57981	11.9572	6.76469e-06	0.000369261	4.62353	1.04372	0.86809	1.38422	0.967099	24.0347	22.1616	24.8314
ENST00000222693.4_1	CAV2	CAV2-201	chr7:116139444-116148595	+	protein_coding	3.56681	11.8499	0.000417777	0.00488047	5.26312	1.69632	1.14765	3.61327	2.43523	35.458	41.7668	35.3224
ENST00000539214.5_1	OAT	OAT-208	chr10:126085872-126107545	-	protein_coding	3.56291	11.818	2.47834e-05	0.000810613	3.8981	0.335189	0.23313	0.056274	0.541417	14.1529	14.2963	13.2972
ENST00000296059.6_1	TM4SF18	TM4SF18-201	chr3:149036285-149051548	-	protein_coding	3.56129	11.8047	1.19309e-06	0.000127756	3.56129	0	0	0	0	10.6395	12.0016	9.87014
ENST00000450736.6_1	SLC16A5	SLC16A5-202	chr17:73085033-73102246	+	protein_coding	3.55951	11.7901	1.76788e-05	0.000661387	3.83229	0.272787	0.257276	0.402556	0	13.4068	13.7466	12.6034
ENST00000238647.4_1	IRF2BPL	IRF2BPL-201	chr14:77490886-77495042	-	protein_coding	3.55627	11.7637	5.09874e-07	7.62625e-05	6.59394	3.03768	6.75491	7.43602	7.46415	98.1802	89.8341	99.0578
ENST00000341037.8_2	TNC	TNC-201	chr9:117782839-117853426	-	protein_coding	3.55484	11.752	9.76461e-08	3.0799e-05	3.55484	0	0	0	0	10.1337	10.935	11.2145
ENST00000636438.1_1	TJP2	TJP2-212	chr9:71760506-71870115	+	protein_coding	3.55267	11.7344	0.00915649	0.0387412	4.71145	1.15878	0.875982	4.93274	0	25.6799	25.4176	24.5147
ENST00000489830.5_1	ETV5	ETV5-213	chr3:185782002-185797695	-	processed_transcript	3.54779	11.6948	1.84316e-06	0.000167202	3.54779	0	0	0	0	10.4633	12.0398	9.70036
ENST00000529064.5_1	TSTA3	TSTA3-210	chr8:144694788-144699652	-	protein_coding	3.54193	11.6473	7.5673e-06	0.000396204	3.54193	0	0	0	0	8.90687	11.9767	11.2908
ENST00000392622.3_1	S100A13	S100A13-202	chr1:153591280-153599524	-	protein_coding	3.53674	11.6055	0.0317833	0.0921909	4.15412	0.617382	0.231864	1.48717	0.178375	35.5563	3.23683	35.437
ENST00000454715.5_1	TM4SF19	TM4SF19-204	chr3:196050420-196065374	-	protein_coding	3.5332	11.5771	3.74767e-07	6.5477e-05	3.5332	0	0	0	0	9.81265	11.3644	10.6062
ENST00000389131.7_1	LOXL2	LOXL2-201	chr8:23154702-23261753	-	protein_coding	3.53215	11.5686	3.69591e-09	5.29288e-06	6.23889	2.70675	5.50569	5.61082	5.46976	74.1942	76.0284	73.3786
ENST00000371610.6_1	PARD6B	PARD6B-201	chr20:49348081-49370278	+	protein_coding	3.52826	11.5375	6.23836e-07	8.56599e-05	6.37029	2.84202	6.11072	6.29671	6.10496	79.9664	88.8839	76.7955
ENST00000395067.6_1	MSANTD3	MSANTD3-203	chr9:103189438-103213511	+	protein_coding	3.52731	11.5299	0.0089928	0.0382474	5.20333	1.67602	6.3515	2.52495	0.259129	39.6816	36.0342	32.1951
ENST00000399199.7_1	PPP1R18	PPP1R18-202	chr6:30644166-30654993	-	protein_coding	3.52693	11.5269	0.00307014	0.0183246	4.01516	0.488232	0.304307	1.11611	0	8.80112	13.9953	27.762
ENST00000407298.7_2	APOBEC3B	APOBEC3B-204	chr22:39378352-39388551	+	protein_coding	3.52402	11.5037	0.0154564	0.055859	4.08179	0.557772	0.350168	0.661433	0.421829	32.7177	4.12739	27.0849
ENST00000242786.5_1	ADGRE5	ADGRE5-201	chr19:14492256-14519533	+	protein_coding	3.5132	11.4177	2.77597e-05	0.000869036	3.65724	0.144045	0.016568	0.327239	0	12.5389	12.4297	10.0451
ENST00000508632.5_1	OCIAD2	OCIAD2-205	chr4:48887036-48908845	-	protein_coding	3.50511	11.3539	3.38949e-09	5.10157e-06	3.50511	0	0	0	0	10.1411	10.3211	10.6042
ENST00000442551.5_2	PSMA7	PSMA7-204	chr20:60711791-60714961	-	protein_coding	3.50327	11.3394	0.0123464	0.0475949	5.08804	1.58477	0.035371	4.17755	4.03462	36.8458	42.2338	23.0501
ENST00000319041.6_1	SH3BGRL3	SH3BGRL3-202	chr1:26606613-26607941	+	protein_coding	3.49545	11.2781	0.000277322	0.00375258	3.66569	0.170237	0.258334	0.044459	0.084056	11.3071	8.2205	17.0109
ENST00000526025.1_1	CD44	CD44-222	chr11:35160429-35198684	+	protein_coding	3.49446	11.2703	2.73972e-05	0.000864146	3.71516	0.220699	0.125315	0.175298	0.196434	15.3151	11.2625	10.3228
ENST00000299663.7_1	CLEC4E	CLEC4E-201	chr12:8685901-8693559	-	protein_coding	3.49049	11.2393	2.23075e-07	4.9027e-05	3.49049	0	0	0	0	10.4517	10.7748	9.52922
ENST00000469350.5_1	PLOD2	PLOD2-205	chr3:145820547-145881440	-	protein_coding	3.48864	11.225	0.0285098	0.0854522	4.5272	1.03855	0	0	7.66775	23.6087	20.0844	22.6274
ENST00000233156.8_2	TFPI	TFPI-201	chr2:188328988-188419219	-	protein_coding	3.48455	11.1932	0.00053876	0.00575675	5.56387	2.07932	3.9471	4.71499	1.66962	41.9815	50.1356	47.1585
ENST00000361791.7_1	PAX2	PAX2-202	chr10:102505977-102589346	+	protein_coding	3.47823	11.1443	2.70762e-05	0.00085833	3.62953	0.151299	0.369735	0	0	11.5788	10.5137	12.0898
ENST00000547649.5_1	MYL6	MYL6-207	chr12:56552146-56555358	+	protein_coding	3.47539	11.1224	3.76555e-05	0.00106037	6.35578	2.88038	6.0405	7.28832	5.8419	84.8391	94.5663	65.9654
ENST00000378512.5_1	RER1	RER1-202	chr1:2323329-2335190	+	protein_coding	3.47046	11.0844	7.1549e-06	0.000382529	4.4804	1.00995	1.16171	1.08189	0.814746	24.118	20.2559	19.8325
ENST00000612365.1_1	AC002401.4	AC002401.4-201	chr17:48171429-48172011	+	lincRNA	3.46814	11.0666	9.30534e-08	2.9787e-05	3.4807	0.0125535	0	0.026448	0	10.722	10.0257	9.76404
ENST00000345988.6_1	PPL	PPL-201	chr16:4932508-4987136	-	protein_coding	3.46346	11.0308	7.63075e-07	9.76632e-05	3.67335	0.209888	0.191077	0.102304	0.178437	12.0489	10.8393	12.4421
ENST00000361981.7_1	L1CAM	L1CAM-202	chrX:153126969-153141399	-	protein_coding	3.45891	10.996	0.000795955	0.00741756	3.45891	0	0	0	0	17.5756	7.30401	7.61946
ENST00000337404.8_1	SOD2	SOD2-201	chr6:160103197-160114310	-	protein_coding	3.45758	10.9859	1.44422e-05	0.000583132	6.82165	3.36407	8.75819	8.26018	11.0801	104.597	123.204	109.352
ENST00000370741.3	CT45A1	CT45A1-001	chrX:134847185-134856990	+	protein_coding	3.45746	10.985	2.37835e-06	0.0001932	3.45746	0	0	0	0	10.2292	11.0377	8.8063
ENST00000307845.7_1	HPCAL1	HPCAL1-201	chr2:10443033-10567735	+	protein_coding	3.45581	10.9724	8.92112e-07	0.000107947	6.69995	3.24414	8.24394	8.79442	8.39542	111.492	95.6927	102.31
ENST00000331563.6_1	PKP3	PKP3-201	chr11:394217-404908	+	protein_coding	3.44929	10.923	8.24069e-10	2.82371e-06	3.44929	0	0	0	0	9.9219	9.76973	10.0795
ENST00000413996.7_1	SGK1	SGK1-205	chr6:134490388-134497129	-	protein_coding	3.4441	10.8838	1.83728e-05	0.000676275	3.4441	0	0	0	0	7.92867	10.7049	11.3362
ENST00000369646.7_1	NT5E	NT5E-202	chr6:86159809-86181317	+	protein_coding	3.44331	10.8777	4.21372e-06	0.000276938	3.44331	0	0	0	0	8.92589	9.40885	11.4578
ENST00000370217.3_1	ARHGAP29	ARHGAP29-202	chr1:94667451-94703189	-	protein_coding	3.44253	10.8719	0.000335751	0.0042339	4.09068	0.648146	0.36749	0.758154	0.600859	24.0855	13.7872	12.3334
ENST00000451238.1_1	TFPI2	TFPI2-202	chr7:93515746-93519482	-	protein_coding	3.44201	10.868	7.43462e-05	0.00163731	3.64513	0.203115	0	0	0.525567	11.4398	11.0967	12.0137
ENST00000343597.3_2	FAM111B	FAM111B-201	chr11:58874710-58894867	+	protein_coding	3.43974	10.8509	0.000214102	0.00318341	3.43974	0	0	0	0	7.14494	9.19794	14.3815
ENST00000564108.5_1	FAM192A	FAM192A-206	chr16:57188191-57219944	-	protein_coding	3.43959	10.8497	0.000442221	0.00507558	3.46421	0.0246209	0	0	0.052531	14.1054	6.16129	11.427
ENST00000568459.5_3	PKM	PKM-220	chr15:72491970-72522063	-	protein_coding	3.43928	10.8474	2.49077e-05	0.000812479	5.63808	2.1988	4.39316	3.36713	3.10845	55.4951	48.2318	43.4058
ENST00000610733.1_1	TPM1	TPM1-233	chr15:63334886-63339925	+	protein_coding	3.43796	10.8375	1.59599e-05	0.000619848	4.01307	0.575117	0.690355	0.246813	0.56893	15.1315	16.0258	14.3245
ENST00000474629.6_1	PARP14	PARP14-202	chr3:122399465-122449687	+	protein_coding	3.43554	10.8193	0.00012584	0.00227593	3.43554	0	0	0	0	7.14154	13.2881	9.88731
ENST00000493293.5_1	LAMC2	LAMC2-204	chr1:183155373-183210396	+	protein_coding	3.43549	10.819	4.19639e-06	0.000276521	3.5914	0.155909	0.118289	0.033446	0.196626	12.3056	10.0284	10.9347
ENST00000511367.6_1	DROSHA	DROSHA-212	chr5:31400604-31532168	-	protein_coding	3.43373	10.8058	0.00494519	0.025396	4.08395	0.650225	0.057443	2.65557	0	16.8656	15.6506	15.3957
ENST00000377722.2_1	AC021218.1	AC021218.1-201	chr7:155755326-155759037	+	lincRNA	3.43119	10.7868	3.74926e-07	6.5477e-05	3.43119	0	0	0	0	10.6154	9.51732	9.27386
ENST00000512160.5_1	STARD4	STARD4-212	chr5:110832645-110848233	-	protein_coding	3.42409	10.7338	0.00432289	0.0231974	3.98812	0.564027	2.23123	0	0	12.5346	18.8149	13.9003
ENST00000312438.7_1	CLCF1	CLCF1-201	chr11:67131639-67141208	-	protein_coding	3.41269	10.6494	8.14899e-05	0.00173446	3.82052	0.407823	0.68341	0.097032	0.264422	13.7073	11.3101	14.5768
ENST00000563085.5_1	USP7	USP7-207	chr16:8988902-9050237	-	protein_coding	3.4118	10.6427	1.98188e-06	0.000173926	3.48168	0.0698841	0.018854	0.097244	0.034419	10.0574	9.26463	11.2821
ENST00000357503.2_1	TOR4A	TOR4A-201	chr9:140172201-140177093	+	protein_coding	3.40711	10.6082	2.15489e-07	4.82325e-05	4.28845	0.881346	0.890787	0.754959	0.883757	19.3203	17.8552	18.4758
ENST00000605930.2_1	ITPR3	ITPR3-202	chr6:33589156-33664346	+	protein_coding	3.40438	10.5881	1.24842e-07	3.48558e-05	6.46258	3.05821	7.52175	7.45035	7.02478	89.6557	83.5857	88.4548
ENST00000430350.2_2	PRNP	PRNP-203	chr20:4666996-4682236	+	protein_coding	3.39368	10.5099	0.00439216	0.0234522	5.34554	1.95186	7.42848	1.61948	1.62265	49.8042	36.7298	34.0688
ENST00000374279.3_1	UGCG	UGCG-201	chr9:114659046-114697649	+	protein_coding	3.39273	10.503	1.18148e-06	0.000127418	6.82286	3.43013	9.33333	9.68096	10.3466	105.647	121.558	110.01
ENST00000390687.8_1	SNRPN	SNRPN-202	chr15:25200074-25223870	+	protein_coding	3.37981	10.4094	0.000117965	0.00218474	3.37981	0	0	0	0	13.2534	7.93154	7.85988
ENST00000320241.4_1	FOXL1	FOXL1-201	chr16:86612112-86615766	+	protein_coding	3.37704	10.3894	3.71134e-07	6.5477e-05	4.25513	0.87809	0.96835	0.790574	0.761569	18.3729	17.6092	18.3126
ENST00000600457.5_1	ZNF83	ZNF83-214	chr19:53157324-53193749	-	processed_transcript	3.37618	10.3832	1.11728e-05	0.000501041	3.68955	0.313369	0.326925	0.298853	0.113253	10.5513	11.7832	13.5455
ENST00000618853.4_2	OPLAH	OPLAH-204	chr8:145106167-145115606	-	protein_coding	3.37342	10.3634	1.30648e-07	3.63423e-05	3.38563	0.0122053	0	0	0.025705	9.04476	9.32492	10.0078
ENST00000495891.1_1	TIPARP	TIPARP-206	chr3:156398955-156424539	+	protein_coding	3.37314	10.3614	0.021775	0.0707811	4.28575	0.912602	5.52597	0.010821	0.011213	20.748	22.7426	13.3703
ENST00000475381.5_1	NCEH1	NCEH1-204	chr3:172348039-172429008	-	protein_coding	3.37202	10.3533	0.00124246	0.00999591	4.46566	1.09364	2.75173	0.599928	0.61929	21.9185	22.7148	18.8465
ENST00000559488.5_1	ITGB3	ITGB3-201	chr17:45331212-45389182	+	protein_coding	3.37076	10.3443	2.21481e-06	0.000184896	3.89104	0.520282	0.551106	0.304938	0.457571	13.5262	14.6748	13.3419
ENST00000434472.6_1	CD44	CD44-210	chr11:35160840-35251213	+	protein_coding	3.36903	10.3318	0.000115137	0.00215533	3.36903	0	0	0	0	6.90334	9.29641	12.553
ENST00000393420.10_2	BCAR1	BCAR1-202	chr16:75263409-75285380	-	protein_coding	3.36555	10.307	0.000888631	0.00798071	3.47155	0.105996	0.246592	0	0	16.3549	6.24966	9.84886
ENST00000546856.5_1	KRT7	KRT7-203	chr12:52632503-52637325	+	processed_transcript	3.36455	10.2998	0.00137998	0.010708	3.36455	0	0	0	0	16.5269	8.84347	5.33339
ENST00000418904.5_1	VOPP1	VOPP1-204	chr7:55539896-55620545	-	protein_coding	3.36109	10.2752	1.94515e-05	0.000697815	3.56532	0.204229	0.087518	0.250497	0.124392	9.43318	10.2902	13.0828
ENST00000369966.7_1	NFKB2	NFKB2-203	chr10:104154354-104162281	+	protein_coding	3.35808	10.2538	0.000184891	0.00289467	4.46246	1.10438	1.35196	0.558329	1.71184	23.1386	21.2523	18.9488
ENST00000549780.5_2	TGIF1	TGIF1-215	chr18:3448497-3457837	+	protein_coding	3.35756	10.2501	3.47867e-05	0.00100551	3.53769	0.180127	0.044848	0.376492	0.011217	9.93522	9.9417	12.0899
ENST00000228945.8_1	ARHGDIB	ARHGDIB-201	chr12:15094951-15114603	-	protein_coding	3.35658	10.2431	2.50495e-06	0.000197953	3.49024	0.133668	0	0.219748	0.08254	10.2866	9.96437	10.4672
ENST00000540846.6_1	SMAD3	SMAD3-204	chr15:67418054-67483100	+	protein_coding	3.35547	10.2352	0.000550089	0.00582891	3.47673	0.121266	0.056083	0.120493	0.087443	8.27453	7.45113	16.6033
ENST00000517504.5_2	TNIP1	TNIP1-204	chr5:150409510-150418759	-	protein_coding	3.35274	10.2159	0.0141468	0.0524165	4.59589	1.24315	1.13045	5.22599	0	16.0459	27.4199	28.1919
ENST00000344320.7_1	C15orf62	C15orf62-201	chr15:41062278-41064647	+	protein_coding	3.35204	10.2109	1.94895e-07	4.51192e-05	3.47874	0.126698	0.12478	0.064539	0.086902	10.7522	9.94245	9.77406
ENST00000620430.4_1	WASHC4	WASHC4-214	chr12:105501492-105562904	+	protein_coding	3.34646	10.1715	0.0346734	0.0978995	4.48295	1.1365	0.015911	8.55096	0.095103	20.1734	24.3787	19.8089
ENST00000557389.1_1	NFKBIA	NFKBIA-209	chr14:35870751-35873346	-	protein_coding	3.34533	10.1635	1.75549e-06	0.00016178	6.45239	3.10706	7.89324	8.26432	6.76391	85.2114	87.3831	87.1357
ENST00000226317.9_1	CXCL6	CXCL6-201	chr4:74702214-74704477	+	protein_coding	3.34529	10.1632	2.91044e-07	5.70863e-05	3.34529	0	0	0	0	8.4981	9.62858	9.39876
ENST00000508792.5_1	KIF20A	KIF20A-205	chr5:137514849-137523354	+	protein_coding	3.34334	10.1495	0.0301967	0.0889998	4.2552	0.911857	5.66022	0	0	21.9805	28.0902	9.4164
ENST00000542506.5_1	FADS1	FADS1-216	chr11:61569785-61582763	-	protein_coding	3.34228	10.1421	0.00695219	0.0320168	3.34228	0	0	0	0	3.53419	9.55567	20.797
ENST00000416109.2_1	CD163L1	CD163L1-202	chr12:7507559-7596742	-	protein_coding	3.34166	10.1377	2.88265e-06	0.000214517	3.34166	0	0	0	0	10.3753	8.24027	8.91231
ENST00000275635.11_1	LAT2	LAT2-201	chr7:73624336-73644161	+	protein_coding	3.34011	10.1268	2.08076e-05	0.0007265	3.34011	0	0	0	0	11.351	7.95413	8.39066
ENST00000366956.9_1	PTPN14	PTPN14-201	chr1:214522039-214724566	-	protein_coding	3.33845	10.1152	4.34929e-08	1.91735e-05	5.38873	2.05028	3.21456	3.22972	2.98589	41.0309	41.4975	40.1695
ENST00000495956.2_1	FRMD4A	FRMD4A-209	chr10:13688334-13699123	-	protein_coding	3.33743	10.1081	0.00208852	0.0141724	4.25742	0.919986	1.39945	1.82305	0	19.9167	16.5515	18.0557
ENST00000357071.8_2	ECE1	ECE1-202	chr1:21545077-21606042	-	protein_coding	3.33697	10.1048	1.22562e-06	0.000129401	6.20756	2.87059	6.67305	5.68818	6.62298	75.7806	70.5778	72.4433
ENST00000285018.4_1	WNT7A	WNT7A-201	chr3:13857755-13921618	-	protein_coding	3.33492	10.0905	1.17536e-07	3.40782e-05	3.33492	0	0	0	0	9.4779	8.5678	9.24827
ENST00000630558.1_1	SPRY4-IT1	SPRY4-IT1-201	chr5:141697185-141697887	-	lincRNA	3.33276	10.0754	1.25184e-06	0.000130886	3.40156	0.068804	0.153815	0	0	9.59924	9.31981	9.78879
ENST00000371997.3_1	NCOA3	NCOA3-201	chr20:46130685-46284486	+	protein_coding	3.33059	10.0602	0.00113031	0.00936221	3.5878	0.257214	0.164074	0	0.466582	14.5449	14.4399	6.24226
ENST00000306010.7_1	MGMT	MGMT-201	chr10:131265448-131566271	+	protein_coding	3.32917	10.0503	5.10981e-07	7.62769e-05	3.32917	0	0	0	0	9.85078	8.51717	8.83041
ENST00000474991.1_1	S100A16	S100A16-205	chr1:153579928-153585621	-	processed_transcript	3.32903	10.0493	6.16572e-07	8.51276e-05	3.38285	0.0538207	0	0	0.11842	9.80861	9.22671	9.26863
ENST00000543672.5_1	DCTN2	DCTN2-202	chr12:57924472-57940955	-	protein_coding	3.31641	9.96185	1.81536e-05	0.000671529	4.90304	1.58663	1.72117	1.9397	2.38698	33.3566	27.8528	26.0205
ENST00000252029.7_1	TYMP	TYMP-201	chr22:50964181-50968485	-	protein_coding	3.31387	9.94428	5.21967e-06	0.000313031	3.31387	0	0	0	0	8.11977	8.4348	10.4289
ENST00000370053.2_1	STMN3	STMN3-201	chr20:62271061-62284780	-	protein_coding	3.31298	9.93816	1.06643e-05	0.000486927	6.75186	3.43888	10.2669	10.9373	8.48223	107.836	97.7787	115.44
ENST00000466151.1_1	PADI2	PADI2-203	chr1:17394281-17409921	-	processed_transcript	3.30758	9.90103	2.59464e-06	0.000201229	3.33554	0.0279643	0.059874	0	0	9.92528	8.06876	9.3828
ENST00000428359.6_1	SLCO2B1	SLCO2B1-203	chr11:74870833-74915762	+	protein_coding	3.30653	9.89381	3.7005e-06	0.000254437	3.30653	0	0	0	0	9.06869	9.95179	7.7828
ENST00000314222.4_1	PHLDA2	PHLDA2-201	chr11:2949503-2950685	-	protein_coding	3.30348	9.87293	3.03554e-06	0.000222579	5.88623	2.58275	4.87256	5.60257	4.54519	60.2299	54.3511	60.0528
ENST00000271638.2_1	S100A11	S100A11-201	chr1:152004982-152009511	-	protein_coding	3.30318	9.87088	7.95159e-07	0.000100389	8.90374	5.60056	43.8923	49.8913	49.0028	488.212	459.817	486.362
ENST00000527096.5_2	PLEC	PLEC-210	chr8:144990345-145049537	-	protein_coding	3.30096	9.85572	4.16835e-05	0.00113474	6.50247	3.20151	9.2682	6.69596	8.8513	77.5009	92.2878	100.769
ENST00000490882.5_1	FLNB	FLNB-212	chr3:57994127-58156501	+	protein_coding	3.2957	9.81985	0.000393851	0.00469037	7.18423	3.88853	8.90449	15.6835	18.6597	149.374	136.823	147.427
ENST00000496720.1_1	PLXNB2	PLXNB2-212	chr22:50721767-50724682	-	processed_transcript	3.29282	9.80025	6.84795e-05	0.00155583	3.65623	0.36341	0.53336	0.067559	0.300637	12.244	13.1043	9.72835
ENST00000296794.10_2	ARHGEF28	ARHGEF28-201	chr5:72921983-73207522	+	protein_coding	3.29025	9.78282	0.000626031	0.00632526	3.29025	0	0	0	0	10.8117	11.9145	5.13764
ENST00000395331.3_1	ASL	ASL-204	chr7:65540871-65557904	+	protein_coding	3.28499	9.7472	0.000303698	0.00396433	3.53792	0.252936	0	0	0.692092	12.723	9.86224	9.51221
ENST00000597629.1_1	ZFP36	ZFP36-203	chr19:39897453-39900052	+	protein_coding	3.27839	9.70275	0.00434043	0.0232669	4.7269	1.44851	2.68913	0.848096	1.98182	22.7819	14.8239	48.3464
ENST00000415912.6_1	ECE1	ECE1-204	chr1:21543740-21671997	-	protein_coding	3.27771	9.69818	9.58001e-07	0.000111447	5.68286	2.40515	3.92268	4.39224	4.5988	52.3323	48.0433	50.8282
ENST00000568321.1_1	HAS3	HAS3-204	chr16:69140157-69140891	+	processed_transcript	3.26939	9.6424	1.56105e-05	0.000611045	3.41718	0.147788	0.257941	0.080951	0	10.2975	8.44671	10.4225
ENST00000326932.8_1	DKK3	DKK3-201	chr11:11984653-12030917	-	protein_coding	3.26652	9.62321	0.000239783	0.00341959	3.50514	0.238625	0.580955	0.038915	0	11.5357	11.7501	8.15796
ENST00000602871.5_2	ATP5G2	ATP5G2-209	chr12:54058950-54069899	-	protein_coding	3.25591	9.55272	3.9858e-07	6.70682e-05	3.31142	0.0555045	0.057103	0.041052	0.019849	9.63625	8.65892	8.52336
ENST00000256495.3_1	BHLHE40	BHLHE40-201	chr3:5020801-5027008	+	protein_coding	3.25435	9.54237	2.02472e-07	4.61122e-05	7.92853	4.67418	23.3744	25.5443	24.7217	245.096	234.357	248.656
ENST00000379716.5_1	SH3KBP1	SH3KBP1-203	chrX:19552125-19689116	-	protein_coding	3.25247	9.52995	0.0269169	0.0820305	4.91974	1.66727	7.39595	2.77443	0.011061	37.5074	17.9276	37.048
ENST00000407780.7_1	ICOSLG	ICOSLG-204	chr21:45642874-45660828	-	protein_coding	3.25035	9.51598	0.000465047	0.00525988	3.85245	0.602095	0.78045	0.962735	0.000816	12.3829	13.487	14.5445
ENST00000518841.5_3	LY6K	LY6K-202	chr8:143781531-143784140	+	protein_coding	3.24627	9.48909	3.40553e-06	0.000241012	3.24627	0	0	0	0	8.46818	7.53482	9.57336
ENST00000465422.1_1	SVIL	SVIL-207	chr10:29975482-30025710	-	processed_transcript	3.23863	9.439	2.0831e-05	0.0007265	3.70008	0.461449	0.262818	0.322488	0.56314	13.91	10.6583	11.6298
ENST00000343959.4_1	FAM25A	FAM25A-201	chr10:88780063-88784487	+	protein_coding	3.2362	9.42308	9.97388e-07	0.000114382	3.2362	0	0	0	0	8.9646	8.74778	7.61416
ENST00000260010.6_1	TLR2	TLR2-201	chr4:154622652-154626851	+	protein_coding	3.23439	9.41126	1.00456e-08	8.2313e-06	3.24661	0.0122245	0.025746	0	0	8.67289	8.51067	8.29428
ENST00000264107.11_3	ITGA6	ITGA6-201	chr2:173292283-173370958	+	protein_coding	3.23272	9.40038	0.00980814	0.0406363	4.66161	1.42889	0.278753	1.49887	5.10777	34.1974	22.1426	18.9034
ENST00000246792.3_1	RRAS	RRAS-201	chr19:50138549-50143458	-	protein_coding	3.22752	9.36659	9.87994e-08	3.10329e-05	5.69731	2.46978	4.44484	4.48294	4.69427	49.815	49.784	53.133
ENST00000307864.2_1	AIFM2	AIFM2-201	chr10:71872027-71892690	-	protein_coding	3.22516	9.35128	4.98641e-06	0.000306104	3.31483	0.0896637	0.204965	0	0	9.1761	8.4375	9.26003
ENST00000342879.7_1	FXYD5	FXYD5-201	chr19:35645676-35660783	+	protein_coding	3.22365	9.3415	0.00079511	0.00741263	3.66639	0.442732	0.329619	0.535551	0.229802	10.1732	8.13757	19.048
ENST00000589163.5_1	PLIN3	PLIN3-205	chr19:4838383-4859648	-	protein_coding	3.22062	9.32185	0.0310154	0.0905912	4.03723	0.81661	4.46351	0	0	20.5455	6.68605	25.7251
ENST00000408965.3_1	CEBPD	CEBPD-201	chr8:48649471-48651648	-	protein_coding	3.21539	9.28815	1.88573e-05	0.000685408	4.31903	1.10363	1.48475	0.929257	1.07018	20.3347	16.8448	19.8867
ENST00000413670.2_1	MIR137HG	MIR137HG-201	chr1:98508908-98511014	-	lincRNA	3.21405	9.27952	1.19959e-05	0.000522414	3.23443	0.0203838	0	0	0.043298	7.23869	8.23717	9.95438
ENST00000491793.1_1	PDZK1IP1	PDZK1IP1-204	chr1:47649272-47651016	-	processed_transcript	3.21307	9.27324	3.89799e-05	0.00108832	3.21307	0	0	0	0	9.44227	6.39937	9.32059
ENST00000261623.7_1	CYBA	CYBA-201	chr16:88709691-88717560	-	protein_coding	3.21015	9.25449	1.01932e-06	0.000115898	8.33127	5.12112	33.261	32.3265	35.918	325.567	301.309	337.425
ENST00000620016.1_1	H2AFB1	H2AFB1-201	chrX:154113247-154113833	+	protein_coding	3.20754	9.23777	1.81738e-07	4.44311e-05	3.21016	0.00261139	0	0	0.005445	8.57821	7.73082	8.47808
ENST00000622268.1_1	AC009093.6	AC009093.6-201	chr16:29283541-29284093	+	lincRNA	3.20752	9.2376	2.58413e-07	5.30898e-05	3.23539	0.0278712	0	0.059669	0	8.83	7.99819	8.44362
ENST00000551016.5_1	RACGAP1	RACGAP1-221	chr12:50383762-50410503	-	protein_coding	3.2053	9.2234	0.015065	0.0547621	4.82927	1.62397	6.79267	0.688914	1.22481	15.4952	34.7026	38.0125
ENST00000270792.9_1	SH3BGRL3	SH3BGRL3-201	chr1:26605667-26608013	+	protein_coding	3.20524	9.22303	3.46372e-07	6.38409e-05	6.18477	2.97953	6.55637	6.91449	7.20437	74.7118	68.4954	72.1617
ENST00000544439.5_1	SRPX	SRPX-206	chrX:38008589-38080177	-	protein_coding	3.20186	9.20141	4.29116e-08	1.91735e-05	3.20186	0	0	0	0	8.15057	8.55587	7.90933
ENST00000532933.1_1	DRAP1	DRAP1-208	chr11:65687195-65689025	+	protein_coding	3.20003	9.18977	0.0110708	0.0441635	3.99584	0.795808	0	0.122676	3.66049	14.9206	14.0145	15.9876
ENST00000502419.1_1	LINC02434	LINC02434-201	chr4:189081219-189082293	+	lincRNA	3.19775	9.17526	5.74239e-07	8.16763e-05	3.19775	0	0	0	0	8.22599	8.78787	7.55368
ENST00000368108.7_1	DUSP23	DUSP23-202	chr1:159750750-159752333	+	protein_coding	3.19682	9.16938	4.25507e-05	0.00114723	3.32315	0.126326	0	0	0.30042	9.18485	10.2747	7.73064
ENST00000540288.5_1	PLCB3	PLCB3-204	chr11:64019019-64036622	+	protein_coding	3.19647	9.16714	0.0164919	0.0583901	4.88391	1.68744	4.68899	4.55923	0.056472	28.9568	27.6119	29.0308
ENST00000448614.1_1	NCOR2	NCOR2-213	chr12:124857006-124873370	-	protein_coding	3.19562	9.1617	8.01591e-07	0.00010088	3.37306	0.177445	0.104125	0.111281	0.178709	8.75103	9.29734	10.0765
ENST00000319518.12_1	CPNE7	CPNE7-202	chr16:89642199-89663654	+	protein_coding	3.19267	9.143	0.00038262	0.00459992	3.72923	0.536559	0.941441	0.571943	0	12.998	11.1717	12.6902
ENST00000422920.1_1	BCL2L1	BCL2L1-205	chr20:30309458-30310901	-	protein_coding	3.19031	9.12809	0.000674424	0.00665455	4.26216	1.07184	2.10669	1.10605	0.419726	17.5604	16.9362	20.2224
ENST00000563985.1_1	MT2A	MT2A-204	chr16:56642496-56643388	+	processed_transcript	3.1818	9.07438	0.000101299	0.00198759	3.68547	0.503667	0.277491	0.195314	0.866452	11.7217	12.6545	11.2599
ENST00000263335.11_1	PAX8	PAX8-202	chr2:113973574-114036488	-	protein_coding	3.18094	9.069	0.00470362	0.0245672	3.18094	0	0	0	0	18.4959	5.86029	4.57688
ENST00000592688.1_1	MYO5B	MYO5B-207	chr18:47352660-47376216	-	protein_coding	3.18047	9.066	9.31374e-06	0.000450357	3.5855	0.405034	0.345261	0.157938	0.490357	11.565	10.4574	11.0166
ENST00000358514.8_1	PSMB10	PSMB10-201	chr16:67968405-67970990	-	protein_coding	3.17888	9.05603	6.76513e-05	0.00154963	3.20326	0.0243788	0.007746	0.043915	0	6.90693	10.8702	7.32459
ENST00000547249.1_1	ELK3	ELK3-202	chr12:96588180-96617460	+	protein_coding	3.17879	9.0555	0.000430107	0.00497979	3.42083	0.242033	0.138252	0	0.453245	7.67984	14.1272	8.35502
ENST00000271688.10_1	CERS2	CERS2-201	chr1:150937649-150947479	-	protein_coding	3.17651	9.04115	0.000375853	0.00454646	4.4478	1.2713	2.53984	0.862209	1.13346	22.3996	20.0641	20.087
ENST00000375441.7_1	CUL4A	CUL4A-203	chr13:113862507-113919386	+	protein_coding	3.17121	9.00802	0.0359831	0.100461	4.19165	1.02044	7.34731	0	0	16.6676	17.5184	17.6489
ENST00000505236.1_1	RELB	RELB-202	chr19:45504719-45541417	+	protein_coding	3.16558	8.97295	0.0194936	0.0656315	3.61251	0.446925	0.375712	0.841138	0	20.7425	3.04319	19.8155
ENST00000242208.4_1	INHBA	INHBA-201	chr7:41724712-41742706	-	protein_coding	3.16198	8.95054	6.42023e-05	0.00149608	4.04362	0.881641	1.00563	0.90261	0.639082	16.3385	18.3824	12.3453
ENST00000562958.6_1	CNN2	CNN2-205	chr19:1026628-1039067	+	protein_coding	3.1586	8.9296	0.0431918	0.114295	3.47794	0.319341	0.162557	0.366382	0.222945	48.6324	3.93764	4.64423
ENST00000530275.3_2	MACF1	MACF1-230	chr1:39875175-39893764	+	protein_coding	3.15854	8.92923	2.88785e-09	4.73256e-06	6.41527	3.25673	8.66969	8.403	8.60381	83.7835	85.3497	83.9167
ENST00000329321.3_3	GPR39	GPR39-201	chr2:133174147-133404132	+	protein_coding	3.15272	8.89329	6.67441e-09	7.23328e-06	3.15272	0	0	0	0	7.97274	7.67453	8.03683
ENST00000419493.2_1	CTSA	CTSA-205	chr20:44521391-44523771	+	protein_coding	3.14767	8.86222	0.000145631	0.00248935	3.48718	0.339512	0	0.217452	0.664019	11.1651	9.50372	10.0352
ENST00000329078.7_2	SPNS2	SPNS2-201	chr17:4402133-4442330	+	protein_coding	3.14526	8.84744	9.36878e-06	0.000452149	3.88956	0.7443	0.579449	0.922199	0.54834	14.5354	12.8525	14.1276
ENST00000537663.5_1	RNF182	RNF182-207	chr6:13924677-13980239	+	protein_coding	3.14243	8.83011	1.50614e-05	0.000598832	3.14243	0	0	0	0	6.95997	9.49462	7.24176
ENST00000376322.7_1	PLP2	PLP2-201	chrX:49028273-49030030	+	protein_coding	3.14088	8.82061	1.68368e-06	0.00015806	3.30458	0.163702	0.114275	0.09371	0.153301	8.49208	9.86499	8.35283
ENST00000498699.5_1	PHLDB2	PHLDB2-215	chr3:111578138-111688696	+	protein_coding	3.1407	8.81949	0.000676954	0.00666556	3.44373	0.303039	0	0.877895	0	8.11335	11.1873	10.5989
ENST00000370315.3_2	MB21D1	MB21D1-201	chr6:74133432-74161999	-	protein_coding	3.1397	8.8134	0.000266157	0.00365262	3.17856	0.0388583	0.084158	0	0	11.8541	6.98725	6.22909
ENST00000425231.2_3	CDCP1	CDCP1-202	chr3:45151708-45187914	-	protein_coding	3.13967	8.81324	1.3896e-05	0.000568558	3.13967	0	0	0	0	9.39907	6.83723	7.39942
ENST00000552550.5_1	PXN	PXN-219	chr12:120660666-120662553	-	protein_coding	3.13704	8.79715	0.00246451	0.015829	3.25829	0.121259	0	0.093493	0.176771	5.59628	6.38721	16.9785
ENST00000375064.5_2	TBC1D2	TBC1D2-203	chr9:100961311-101017862	-	protein_coding	3.13672	8.79523	2.5844e-06	0.000200826	3.13672	0	0	0	0	8.69169	6.98939	7.78676
ENST00000554444.5_1	TUBB3	TUBB3-206	chr16:89988259-90002499	+	protein_coding	3.13546	8.78756	0.000311373	0.00403132	3.63285	0.49739	0.027517	0.929985	0.41855	11.6342	10.4547	12.1904
ENST00000338560.11_1	TRPV2	TRPV2-201	chr17:16318856-16340317	+	protein_coding	3.13472	8.78305	2.13679e-05	0.000739226	3.44411	0.309384	0.480472	0.196913	0.073839	9.70715	9.9322	10.0143
ENST00000397709.1_1	MAP1LC3A	MAP1LC3A-203	chr20:33146522-33148149	+	protein_coding	3.13424	8.7801	0.000740366	0.00705763	3.13424	0	0	0	0	10.141	10.0336	4.50624
ENST00000531285.1_3	TRNP1	TRNP1-202	chr1:27320810-27326600	+	protein_coding	3.12613	8.73089	9.2176e-05	0.00187546	3.5005	0.374368	0.027968	0.587198	0.334987	10.1952	9.40401	11.446
ENST00000523190.5_1	PVT1	PVT1-217	chr8:129021904-129113343	+	lincRNA	3.12493	8.72366	0.000145139	0.00248662	3.34417	0.219237	0	0.577576	0	8.96599	8.95952	9.55183
ENST00000323441.10_1	HIF1A	HIF1A-201	chr14:62162495-62214976	+	protein_coding	3.12303	8.71217	0.0452082	0.117952	5.28849	2.16546	0	8.82219	8.19174	35.1518	42.4828	36.9785
ENST00000481390.5_1	PLAU	PLAU-203	chr10:75668935-75672807	+	protein_coding	3.12296	8.71172	0.00177945	0.0126921	3.40253	0.279573	0.788463	0	0	5.97587	10.5515	13.6742
ENST00000547804.1_1	LINC00941	LINC00941-201	chr12:30948865-30955645	+	lincRNA	3.11943	8.69045	5.5845e-06	0.000326849	3.17816	0.0587263	0.031288	0.095608	0	7.00094	8.61431	8.64055
ENST00000358807.7_3	MICAL1	MICAL1-202	chr6:109765265-109777190	-	protein_coding	3.11703	8.67598	0.00477248	0.0248112	4.13547	1.01845	2.57952	0.982048	0.171678	15.3935	11.8733	24.7242
ENST00000258390.11_1	DOCK10	DOCK10-201	chr2:225629807-225907159	-	protein_coding	3.11432	8.65972	6.30031e-08	2.30628e-05	3.11432	0	0	0	0	7.57624	8.02899	7.38641
ENST00000409112.5_1	SP100	SP100-203	chr2:231280981-231372861	+	protein_coding	3.11312	8.65251	1.12084e-05	0.000502043	3.11312	0	0	0	0	6.45809	7.85381	8.80999
ENST00000495713.5_1	ANXA1	ANXA1-208	chr9:75775179-75782785	+	processed_transcript	3.11291	8.65124	5.15304e-06	0.000310517	3.42212	0.309213	0.15168	0.243863	0.327831	10.7825	9.58428	8.87606
ENST00000433892.6_1	CD44	CD44-209	chr11:35160735-35251574	+	protein_coding	3.10867	8.62585	0.0313714	0.0913194	3.10867	0	0	0	0	13.1224	1.32166	18.5749
ENST00000537171.5_1	RHOF	RHOF-203	chr12:122218393-122232168	-	protein_coding	3.10386	8.59714	7.03509e-05	0.00157968	3.72367	0.619812	0.306682	0.673543	0.659356	14.3417	10.0078	12.6532
ENST00000521089.5_1	WWC1	WWC1-209	chr5:167719155-167896221	+	protein_coding	3.10172	8.58442	0.000170352	0.00274808	4.33326	1.23154	2.20597	1.06631	0.954496	19.6529	19.6428	18.2121
ENST00000304061.7_1	RIOX1	RIOX1-201	chr14:73957669-73960096	+	protein_coding	3.09781	8.5612	8.61898e-10	2.82493e-06	3.09781	0	0	0	0	7.43487	7.6271	7.62303
ENST00000216181.9_1	MYH9	MYH9-201	chr22:36677327-36784063	-	protein_coding	3.09722	8.55766	5.29098e-08	2.17855e-05	8.90241	5.80519	55.7323	55.1847	53.8482	482.612	460.821	489.575
ENST00000588605.5_2	C19orf33	C19orf33-202	chr19:38794804-38795646	+	protein_coding	3.09456	8.54193	3.12773e-05	0.000936468	3.09456	0	0	0	0	9.2532	6.18172	7.46409
ENST00000540338.5_2	CLIP1	CLIP1-213	chr12:122757381-122865041	-	protein_coding	3.09175	8.52527	0.0436832	0.115249	4.15394	1.06219	8.1045	0	0	16.6942	17.4007	16.3267
ENST00000372925.6_1	MACF1	MACF1-205	chr1:39765986-39952659	+	protein_coding	3.09161	8.52448	0.0323471	0.0933096	5.01143	1.91982	0	6.5768	6.1496	29.8491	31.7083	32.2561
ENST00000393150.7_1	CASP4	CASP4-201	chr11:104813595-104827425	-	protein_coding	3.08406	8.48	0.00421025	0.022791	3.08406	0	0	0	0	4.48328	5.36144	16.482
ENST00000513163.5_1	FBXL5	FBXL5-211	chr4:15606629-15646272	-	protein_coding	3.07665	8.43651	0.0243987	0.0765182	3.92172	0.845074	0	0	4.79666	10.1653	16.9789	16.3394
ENST00000309955.7_1	CFLAR	CFLAR-201	chr2:201980827-202041410	+	protein_coding	3.07053	8.40084	2.81125e-05	0.00087463	3.248	0.177471	0.031696	0.37456	0.019898	8.62552	8.72829	8.15756
ENST00000252725.9_1	ARPC1B	ARPC1B-201	chr7:98972298-98992424	+	protein_coding	3.06675	8.37881	0.000891938	0.00800058	5.94045	2.87371	5.51189	5.02309	9.039	42.2691	77.2712	67.3887
ENST00000525209.5_1	CD44	CD44-213	chr11:35201905-35222183	+	processed_transcript	3.06282	8.35603	0.000100042	0.00197321	3.06282	0	0	0	0	6.43147	6.15585	9.97145
ENST00000372484.7_1	CTSA	CTSA-204	chr20:44519683-44527459	+	protein_coding	3.06216	8.35222	1.35536e-05	0.000559712	4.05024	0.988075	1.3056	0.78316	0.898221	14.719	15.6757	16.3467
ENST00000544008.1	MYEOV	MYEOV-008	chr11:69061618-69156450	+	processed_transcript	3.06062	8.3433	4.49329e-05	0.00118725	3.06062	0	0	0	0	8.58045	5.69146	8.05956
ENST00000477992.1_1	ARPC2	ARPC2-212	chr2:219100064-219118831	+	processed_transcript	3.0592	8.33509	0.00408897	0.0223106	5.36199	2.30279	2.04025	3.43655	7.90581	33.4493	56.9465	33.8459
ENST00000381901.5_1	KLRC2	KLRC2-201	chr12:10583208-10588592	-	protein_coding	3.05899	8.33387	4.31132e-06	0.000280245	3.05899	0	0	0	0	6.37942	8.02829	7.68786
ENST00000395748.7_1	AREG	AREG-201	chr4:75310851-75320726	+	protein_coding	3.05284	8.29843	7.36066e-07	9.5013e-05	3.1209	0.0680634	0	0.02468	0.124292	7.83702	7.86343	7.40519
ENST00000373314.7_1	FAM129B	FAM129B-202	chr9:130267618-130341268	-	protein_coding	3.05203	8.2938	4.23067e-07	6.97865e-05	3.06263	0.0105978	0.009811	0	0.01235	7.91484	7.24561	6.93406
ENST00000468980.3_1	PAX8	PAX8-208	chr2:113976105-113999260	-	protein_coding	3.05123	8.28919	0.000805738	0.00748026	3.05123	0	0	0	0	4.21436	9.70689	9.20169
ENST00000448083.6_1	FOSL1	FOSL1-202	chr11:65659520-65667890	-	protein_coding	3.05064	8.28578	3.24736e-05	0.00095962	3.31827	0.267636	0.257953	0	0.386868	8.43402	8.94844	9.57421
ENST00000522591.1_3	LY6K	LY6K-205	chr8:143781890-143785582	+	protein_coding	3.05043	8.28459	3.56057e-06	0.000248068	3.07236	0.0219329	0	0.033963	0.012284	8.32869	6.63461	7.35627
ENST00000527207.1_1	TNKS1BP1	TNKS1BP1-203	chr11:57087851-57089809	-	protein_coding	3.05029	8.28379	0.00378144	0.0211547	3.34743	0.297144	0.407815	0.082086	0.2177	12.5832	4.15469	14.0601
ENST00000631211.1_1	FP671120.3	FP671120.3-201	GL000220.1:109831-110753	-	lincRNA	3.05027	8.28368	5.20486e-05	0.00130744	3.53461	0.484336	0.503022	0.263557	0.44158	8.83585	10.2984	13.0036
ENST00000438323.2_2	IFI35	IFI35-204	chr17:41158757-41166473	+	protein_coding	3.04539	8.25567	6.02028e-06	0.000338681	3.04539	0	0	0	0	6.22175	7.80269	7.85116
ENST00000332822.4_1	NOG	NOG-201	chr17:54671060-54672951	+	protein_coding	3.03981	8.22382	1.77659e-05	0.000663661	4.44629	1.40648	2.12403	1.50345	1.3819	19.672	21.1822	21.5949
ENST00000407997.3_1	APOBEC3G	APOBEC3G-201	chr22:39473010-39483748	+	protein_coding	3.03344	8.18759	1.42734e-05	0.000578474	3.20329	0.169849	0.23	0.100352	0.051846	9.46258	8.02609	7.27408
ENST00000308377.8_1	SLFN11	SLFN11-201	chr17:33677324-33700626	-	protein_coding	3.03262	8.18295	0.00336292	0.0194831	3.03262	0	0	0	0	10.3656	10.5569	3.17156
ENST00000420316.6_1	EGFR	EGFR-204	chr7:55086727-55224644	+	protein_coding	3.03015	8.16897	0.0342598	0.0971017	3.24553	0.215377	0.127431	0.081113	0.283936	3.812	3.96295	34.7224
ENST00000474136.5_1	APP	APP-215	chr21:27381911-27543064	-	processed_transcript	3.02932	8.16423	0.000914234	0.00811938	3.21649	0.187171	0.163779	0.268123	0	6.81183	6.03976	13.6038
ENST00000446879.5_1	TM4SF19	TM4SF19-203	chr3:196046213-196065259	-	protein_coding	3.02876	8.16106	0.000354151	0.0043874	3.02876	0	0	0	0	10.8483	5.79021	5.75616
ENST00000469435.1_1	KLF6	KLF6-204	chr10:3822519-3827385	-	protein_coding	3.02405	8.13449	0.000266293	0.00365262	5.09087	2.06682	3.87059	1.97672	4.0723	34.7369	31.9711	32.5942
ENST00000598322.1_1	AC022150.4	AC022150.4-201	chr19:53153690-53156537	-	sense_intronic	3.02115	8.11812	2.26812e-06	0.000187478	3.3825	0.361353	0.346677	0.354078	0.162591	9.47589	9.15156	9.66539
ENST00000532601.1_1	FTH1	FTH1-207	chr11:61732073-61734638	-	protein_coding	3.02044	8.11417	0.00862221	0.0371804	8.74966	5.72922	86.9081	74.994	21.3457	402.943	430.754	456.276
ENST00000567984.1_1	AC009093.4	AC009093.4-201	chr16:29273594-29275800	-	lincRNA	3.01897	8.10588	2.09605e-05	0.000729625	3.13909	0.120122	0.283752	0	0	7.19791	8.17782	8.08738
ENST00000264001.8_4	CKLF	CKLF-201	chr16:66586470-66599975	+	protein_coding	3.01846	8.10301	1.49319e-05	0.000596916	4.89484	1.87638	3.05075	2.8015	2.21401	30.083	30.259	26.1007
ENST00000409584.5_1	IL1RL1	IL1RL1-204	chr2:102953718-102961411	+	protein_coding	3.01508	8.08405	0.00550248	0.0272865	3.01508	0	0	0	0	2.77273	11.7333	9.99745
ENST00000422838.1_2	RANGAP1	RANGAP1-204	chr22:41676937-41681909	-	protein_coding	3.01216	8.06773	0.00202488	0.0138553	3.37063	0.358469	1.10732	0	0	12.1917	6.78902	9.76961
ENST00000375142.5_3	CAPZB	CAPZB-203	chr1:19665317-19811979	-	protein_coding	3.012	8.06683	0.0438904	0.115598	5.06932	2.05732	1.30506	0.811734	16.2651	37.983	30.5118	29.811
ENST00000476846.1	DOCK4	DOCK4-002	chr7:111502939-111846449	-	processed_transcript	3.00967	8.05379	0.000483606	0.00538655	5.0064	1.99673	3.02712	3.00851	2.93774	20.5743	39.7717	36.7511
ENST00000434127.2_1	SPRY4	SPRY4-202	chr5:141692539-141704605	-	protein_coding	3.00949	8.05281	0.00424503	0.0229067	3.15814	0.148651	0.182506	0.151972	0	3.41431	12.034	11.3637
ENST00000467067.1_1	ERRFI1	ERRFI1-202	chr1:8073487-8075693	-	protein_coding	3.00615	8.03418	3.53185e-05	0.00101504	3.97289	0.966738	1.3429	0.749304	0.821515	16.2689	13.9147	14.0313
ENST00000451437.5_1	MYO1B	MYO1B-209	chr2:192127725-192228599	+	protein_coding	3.00228	8.01263	0.00195034	0.0135182	3.54265	0.540377	0.248552	0	1.46378	8.60217	12.064	11.6151
ENST00000530920.1_1	TNKS1BP1	TNKS1BP1-205	chr11:57077306-57078943	-	processed_transcript	3	7.99999	0.000113815	0.00214067	3.11777	0.117767	0.048516	0.136308	0.072219	10.3963	6.53367	6.61821
ENST00000435224.2_1	ABTB2	ABTB2-201	chr11:34172535-34379555	-	protein_coding	2.99864	7.99246	3.07523e-07	5.92898e-05	4.76799	1.76935	2.34533	2.47578	2.40712	26.9282	24.7028	27.1772
ENST00000345896.8_1	CERS2	CERS2-202	chr1:150937649-150947319	-	processed_transcript	2.9955	7.97511	0.00920896	0.0388956	3.35274	0.357235	0	0	1.10192	4.26643	9.94816	17.4914
ENST00000532899.2_1	BCL9L	BCL9L-205	chr11:118779126-118796162	-	protein_coding	2.99442	7.96913	0.0060047	0.0289479	4.18085	1.18643	0.052624	2.54314	2.16074	19.0272	16.3756	16.1443
ENST00000219322.7_1	HAS3	HAS3-201	chr16:69140160-69152622	+	protein_coding	2.99347	7.96385	0.000388684	0.00464685	3.21433	0.220868	0	0.582938	0	10.3908	6.8036	7.99466
ENST00000295211.5_3	SERPINB8	SERPINB8-201	chr18:61647042-61654630	+	protein_coding	2.99284	7.96038	0.000312559	0.00403708	2.99284	0	0	0	0	4.58281	8.19958	8.82156
ENST00000372792.6_2	CAP1	CAP1-202	chr1:40506421-40537207	+	protein_coding	2.99031	7.94645	0.000189678	0.00294429	6.40742	3.41711	9.13475	13.2593	7.43418	84.0877	79.3877	88.4166
ENST00000532884.1_1	PUF60	PUF60-220	chr8:144899250-144900646	-	protein_coding	2.98425	7.91316	0.0010138	0.00870142	4.02202	1.03776	1.27081	1.90789	0.310489	15.4064	13.7932	16.6671
ENST00000559195.5_1	TNFAIP2	TNFAIP2-203	chr14:103589779-103596370	+	processed_transcript	2.98423	7.91304	5.4944e-05	0.0013514	2.98423	0	0	0	0	8.72419	5.55058	6.77854
ENST00000415816.6_2	IFI35	IFI35-203	chr17:41158742-41166473	+	protein_coding	2.98293	7.90593	0.000262582	0.00362007	3.51646	0.533527	0.925366	0.161812	0.355732	12.0619	8.87387	10.6195
ENST00000470131.5_2	PDCD10	PDCD10-206	chr3:167402044-167452680	-	protein_coding	2.9817	7.89916	0.0191243	0.0647765	3.89509	0.913392	0	3.85472	0.376294	7.99515	18.4319	17.8406
ENST00000519390.1_1	LY6K	LY6K-204	chr8:143783017-143784878	+	processed_transcript	2.98055	7.89285	1.70791e-05	0.000647981	2.98055	0	0	0	0	6.33866	6.16442	8.35199
ENST00000353088.6_1	NSFL1C	NSFL1C-202	chr20:1422807-1447473	-	protein_coding	2.97927	7.88589	0.00420122	0.0227534	3.93244	0.953171	0	1.52297	1.87665	12.5088	18.1949	12.7262
ENST00000303910.4_1	HIST1H2AE	HIST1H2AE-201	chr6:26217203-26217711	+	protein_coding	2.97731	7.87514	1.10599e-05	0.000498945	7.83969	4.86239	24.2217	29.5485	30.9455	228.696	218.637	237.28
ENST00000409652.4_1	APOL6	APOL6-201	chr22:36044442-36064456	+	protein_coding	2.97054	7.83827	2.22707e-08	1.29441e-05	2.98058	0.0100494	0.021117	0	0	6.7466	7.12129	6.81627
ENST00000429976.5_2	TRANK1	TRANK1-201	chr3:36868311-36986548	-	protein_coding	2.96862	7.82787	3.05316e-08	1.5873e-05	2.98157	0.0129462	0	0.01324	0.013863	6.97643	6.64415	7.08137
ENST00000549243.5_1	SLC48A1	SLC48A1-207	chr12:48152777-48172894	+	protein_coding	2.96857	7.82761	0.000816185	0.00754658	3.36067	0.392093	0.292215	0	0.748882	12.9951	7.25528	8.38155
ENST00000378292.7_1	TPM2	TPM2-203	chr9:35681989-35691017	-	protein_coding	2.96521	7.80937	3.43156e-06	0.000241813	5.60751	2.64231	5.2827	4.64463	5.86211	48.0686	47.7659	47.4361
ENST00000264716.8_1	FOSL2	FOSL2-201	chr2:28615725-28640179	+	protein_coding	2.96375	7.80151	1.02913e-06	0.000116486	4.43379	1.47004	1.91061	1.79887	1.60982	19.7677	20.3597	21.7577
ENST00000393991.5_2	TSC22D4	TSC22D4-202	chr7:100064161-100076855	-	protein_coding	2.96111	7.7872	0.00462316	0.0242984	3.46155	0.500447	0	1.83106	0	10.9395	8.17154	11.2085
ENST00000381294.7_1	IL6ST	IL6ST-205	chr5:55236910-55272106	-	protein_coding	2.9594	7.77798	0.000213327	0.00317598	5.41766	2.45827	3.6909	3.72039	6.49554	41.1246	45.0036	39.3005
ENST00000412253.1_1	CYP26B1	CYP26B1-202	chr2:72356522-72370213	-	protein_coding	2.95748	7.76766	0.00987689	0.0408157	2.96073	0.00325044	0	0	0.006782	11.0963	2.20566	11.1685
ENST00000292430.10_3	LY6K	LY6K-201	chr8:143781529-143786545	+	protein_coding	2.9551	7.75484	6.57513e-07	8.9631e-05	3.03789	0.0827961	0.040484	0.088901	0.048452	7.78214	6.82803	7.05821
ENST00000301015.13_2	PIEZO1	PIEZO1-201	chr16:88781754-88851619	-	protein_coding	2.95289	7.74296	1.22506e-06	0.000129401	6.05228	3.0994	7.51871	7.90217	7.30168	68.3106	60.4611	67.6053
ENST00000520999.6_1	TSPAN18	TSPAN18-209	chr11:44748724-44940872	+	protein_coding	2.94889	7.72155	0.000176826	0.00281458	3.95356	1.00466	1.18713	0.562927	1.36314	16.5096	12.2026	15.0872
ENST00000397621.5_1	FBXL16	FBXL16-202	chr16:742500-755829	-	protein_coding	2.94824	7.71805	0.0201204	0.0670182	3.20881	0.26057	0.090264	0.123632	0.403339	26.1613	4.00181	4.81786
ENST00000478934.5_1	VPS52	VPS52-217	chr6:33218049-33239824	-	processed_transcript	2.94445	7.69781	0.000139749	0.00242962	2.97238	0.0279284	0.047399	0	0.011835	4.91685	7.77719	8.30846
ENST00000435575.5_3	TMEM40	TMEM40-205	chr3:12775057-12800776	-	protein_coding	2.94275	7.68877	1.69239e-05	0.000644013	2.94275	0	0	0	0	8.01955	5.79083	6.42099
ENST00000287771.9_1	RBPMS	RBPMS-201	chr8:30242043-30429773	+	protein_coding	2.93879	7.66767	0.000156593	0.00260818	3.18471	0.245917	0	0.567971	0.063524	8.7048	7.41203	8.2085
ENST00000326427.10_1	ITM2C	ITM2C-202	chr2:231729615-231743962	+	protein_coding	2.93858	7.66657	0.00128291	0.0101995	6.14783	3.20925	4.86206	9.15555	12.2888	69.6117	61.3059	80.0287
ENST00000613397.4_3	BIRC2	BIRC2-213	chr11:102218105-102249394	+	protein_coding	2.92913	7.61653	0.0151447	0.0549868	2.92913	0	0	0	0	1.82033	10.7469	12.3366
ENST00000371579.6_1	DPP7	DPP7-201	chr9:140004994-140009170	-	protein_coding	2.92164	7.57708	0.000441603	0.00507057	3.45726	0.535617	0.299081	0.462512	0.603151	10.8017	6.80231	13.3896
ENST00000343958.8_1	FGD6	FGD6-201	chr12:95470525-95611240	-	protein_coding	2.92149	7.57629	2.84849e-06	0.00021345	4.23472	1.31323	1.43208	1.3127	1.72813	17.9573	18.4481	17.1
ENST00000272117.7_1	ITPKB	ITPKB-201	chr1:226819391-226925159	-	protein_coding	2.92118	7.57465	0.00168556	0.0122212	3.30711	0.385929	0	1.23115	0	9.06382	8.25912	9.40598
ENST00000396105.5_2	ZNFX1	ZNFX1-204	chr20:47862437-47894756	-	protein_coding	2.92095	7.57344	0.0248905	0.0776633	4.58742	1.66647	4.64995	0	4.66145	24.0448	21.5818	23.5683
ENST00000484638.1_1	RIN2	RIN2-206	chr20:19915769-19983101	+	processed_transcript	2.91902	7.56332	0.000708466	0.00686995	2.91902	0	0	0	0	10.6228	5.09749	5.10487
ENST00000359092.7_1	AXL	AXL-202	chr19:41725140-41766199	+	protein_coding	2.91536	7.54417	2.73302e-06	0.000208027	2.91536	0	0	0	0	7.11634	5.81286	6.76506
ENST00000370243.1_1	BCAR3	BCAR3-202	chr1:94027351-94146926	-	protein_coding	2.91524	7.54353	0.022297	0.0719639	2.92727	0.0120266	0.025324	0	0	11.838	12.7398	1.49521
ENST00000495841.1_1	CAV2	CAV2-214	chr7:116140098-116146407	+	processed_transcript	2.9123	7.52818	1.40097e-06	0.000140253	3.37387	0.461573	0.437424	0.432688	0.267959	9.59875	9.04016	9.46928
ENST00000280527.6_1	CRIM1	CRIM1-201	chr2:36583069-36778278	+	protein_coding	2.90882	7.51001	1.99908e-07	4.56663e-05	6.00076	3.09194	7.20834	7.97348	7.41563	62.3204	63.6769	63.1111
ENST00000587634.5_1	NEDD4L	NEDD4L-219	chr18:55914513-55990541	+	processed_transcript	2.9087	7.50939	8.31371e-06	0.00042175	3.3082	0.399508	0.32619	0.325303	0.305783	9.71121	9.51375	7.62999
ENST00000415790.5_3	DNTTIP1	DNTTIP1-202	chr20:44421175-44430694	+	protein_coding	2.90704	7.50079	0.00379255	0.0211933	3.79472	0.887675	0.114409	0.959363	1.90062	8.69222	16.9636	14.3517
ENST00000374886.7_1	MSANTD3	MSANTD3-202	chr9:103189719-103212963	+	protein_coding	2.90615	7.49616	0.0177786	0.0615401	3.67175	0.765593	3.78107	0.027718	0	12.6968	11.677	10.9201
ENST00000372712.6_1	DBNDD2	DBNDD2-204	chr20:44035847-44039250	+	protein_coding	2.90383	7.48412	0.00419115	0.0227185	3.75399	0.850155	0.324207	2.39499	0.303083	14.6303	14.1207	9.39076
ENST00000451311.6_1	TMSB4X	TMSB4X-204	chrX:12993227-12995346	+	protein_coding	2.89862	7.45711	1.0132e-07	3.16298e-05	8.3821	5.48348	43.8051	45.3626	42.1101	326.65	336.412	334.904
ENST00000373366.2_1	GJB3	GJB3-202	chr1:35246790-35251965	+	protein_coding	2.89819	7.45491	2.26679e-06	0.000187478	2.89819	0	0	0	0	6.60994	5.78076	7.02911
ENST00000406575.1_1	IL6	IL6-205	chr7:22766859-22769434	+	protein_coding	2.89727	7.45015	6.19613e-05	0.00146273	2.89727	0	0	0	0	6.91018	7.75488	4.97116
ENST00000320354.5_1	FOXC2	FOXC2-201	chr16:86600857-86603334	+	protein_coding	2.89675	7.44747	3.21201e-06	0.000231708	3.99804	1.10129	1.32565	1.06768	1.05371	13.8822	15.3271	15.7888
ENST00000358334.9_1	MYOF	MYOF-201	chr10:95066187-95241951	-	protein_coding	2.89628	7.44505	0.0442513	0.116189	2.89658	0.000299026	0	0.000622	0	2.83121	28.7648	2.62104
ENST00000367511.3_1	FAM129A	FAM129A-201	chr1:184760164-184943682	-	protein_coding	2.89611	7.44418	2.50954e-06	0.000197953	4.55603	1.65991	2.37084	1.86837	2.26346	23.1646	22.2269	22.1917
ENST00000449482.1_2	DCBLD2	DCBLD2-203	chr3:98568232-98620015	-	protein_coding	2.89576	7.44233	0.000468463	0.00528188	3.38577	0.490013	0.423503	0.569536	0.239926	11.5829	11.4165	6.30926
ENST00000326577.8_1	TNFRSF12A	TNFRSF12A-201	chr16:3070313-3072384	+	protein_coding	2.89389	7.43271	6.20982e-05	0.00146476	5.47108	2.57719	4.43313	5.00001	5.51973	36.634	42.431	52.394
ENST00000379370.6_1	AGRN	AGRN-201	chr1:955503-991496	+	protein_coding	2.8904	7.41474	1.24434e-05	0.000534186	6.53198	3.64158	13.16	10.4119	11.0297	93.4071	84.6912	96.9544
ENST00000313080.8_1	RHBDF2	RHBDF2-201	chr17:74466978-74497489	-	protein_coding	2.88872	7.40611	0.00970034	0.040327	3.52693	0.638219	0.402968	1.38407	0.127206	14.4403	4.5349	16.9215
ENST00000594605.5_1	STAP2	STAP2-201	chr19:4324040-4338874	-	protein_coding	2.88813	7.40312	1.15685e-06	0.000126023	2.90632	0.0181847	0.038538	0	0	6.62596	6.95456	5.94633
ENST00000255006.10_1	RIN2	RIN2-201	chr20:19867165-19983101	+	protein_coding	2.87455	7.33376	6.3574e-05	0.00148834	4.02684	1.15229	1.09952	1.35449	1.22127	12.153	17.8347	16.483
ENST00000569359.5_1	CYBA	CYBA-210	chr16:88711495-88717438	-	protein_coding	2.87442	7.3331	0.00103899	0.00885713	4.35865	1.48423	0.790351	2.77778	2.23754	20.7333	17.4479	20.5367
ENST00000437633.1	DOCK4	DOCK4-001	chr7:111368276-111846450	-	protein_coding	2.86661	7.29347	0.00977232	0.04053	3.0489	0.182296	0	0.440712	0.014033	2.99526	7.53804	15.6161
ENST00000449135.6_1	PRRG1	PRRG1-202	chrX:37208625-37316542	+	protein_coding	2.86525	7.2866	0.0056516	0.027775	3.38394	0.518689	0	1.94051	0	8.98661	11.0603	8.44546
ENST00000309295.8_1	EHBP1L1	EHBP1L1-201	chr11:65343509-65360121	+	protein_coding	2.86166	7.26849	6.88501e-06	0.000373127	4.35764	1.49598	1.8001	2.11185	1.57522	19.2969	18.4014	20.8814
ENST00000528455.5_1	CD44	CD44-228	chr11:35198246-35223314	+	protein_coding	2.85991	7.25968	0.0415719	0.111307	2.85991	0	0	0	0	12.3674	14.0257	0.904902
ENST00000410113.5_1	EVA1A	EVA1A-205	chr2:75719612-75788064	-	protein_coding	2.85865	7.25337	1.57757e-06	0.000150346	2.88978	0.0311331	0.066881	0	0	7.012	6.20092	6.05677
ENST00000251973.9_1	CARD10	CARD10-201	chr22:37886402-37915247	-	protein_coding	2.85654	7.24275	0.0017799	0.012694	3.83009	0.973556	0.306792	1.56936	1.25516	9.14605	15.4105	16.2782
ENST00000549384.5_1	CORO1C	CORO1C-210	chr12:109040765-109125294	-	processed_transcript	2.85593	7.2397	0.0291773	0.0868304	4.34535	1.48942	0.482934	7.71245	0.713233	13.33	21.8612	24.6387
ENST00000434648.5_1	CAPN2	CAPN2-203	chr1:223889347-223934765	+	protein_coding	2.85368	7.22842	0.000323319	0.00412724	2.85368	0	0	0	0	4.12981	7.49166	7.67033
ENST00000302278.7_1	ITGB1	ITGB1-201	chr10:33189320-33247137	-	protein_coding	2.85223	7.22116	7.2863e-06	0.000386864	8.00272	5.15049	37.7335	34.5314	31.5581	242.623	247.168	278.071
ENST00000395850.7_1	CD59	CD59-202	chr11:33730246-33757985	-	protein_coding	2.85172	7.21858	1.38581e-05	0.000568067	5.02302	2.17131	3.49506	3.36901	3.65337	29.3896	36.7731	28.9457
ENST00000245932.10_1	VASP	VASP-201	chr19:46010674-46030241	+	protein_coding	2.84792	7.19963	6.39605e-06	0.000355575	5.54564	2.69771	5.94459	5.61694	4.94258	45.4395	42.431	49.5267
ENST00000308946.3	MYEOV	MYEOV-004	chr11:69061622-69064754	+	protein_coding	2.84776	7.19879	0.00241067	0.015616	2.86907	0.0213195	0	0	0.04533	9.25715	8.24431	3.11274
ENST00000535401.5_1	NNMT	NNMT-203	chr11:114128553-114184007	+	protein_coding	2.84757	7.19787	0.00251193	0.0160352	2.8733	0.0257349	0	0	0.054972	3.58679	11.5224	5.84942
ENST00000524608.5_1	CYB5R2	CYB5R2-203	chr11:7690436-7698453	-	protein_coding	2.84582	7.18915	9.41005e-06	0.000452749	2.84582	0	0	0	0	5.48419	7.21512	5.9753
ENST00000373203.8_1	ENG	ENG-202	chr9:130577291-130617035	-	protein_coding	2.84543	7.18718	0.000628206	0.00633989	2.84543	0	0	0	0	9.77673	4.73429	5.00772
ENST00000375964.10_1	BAG6	BAG6-236	chr6:31606806-31620477	-	protein_coding	2.84464	7.18326	0.0125859	0.0482103	3.99025	1.14561	3.7527	1.27852	0	12.4974	16.7961	15.7101
ENST00000627981.1_1	FP236383.3	FP236383.3-201	GL000220.1:153803-154725	-	lincRNA	2.84462	7.18319	0.000127263	0.00229567	3.44842	0.603794	0.679734	0.334611	0.565617	7.96227	9.8234	12.4107
ENST00000334133.8_1	RFTN1	RFTN1-201	chr3:16357363-16555213	-	protein_coding	2.84307	7.17547	7.83308e-06	0.000404722	4.37138	1.52831	1.9656	1.72476	1.97002	17.3796	20.5574	21.3778
ENST00000608978.1_1	ETS1	ETS1-209	chr11:128359365-128375289	-	protein_coding	2.83782	7.14939	2.71974e-05	0.000860365	2.83782	0	0	0	0	7.54939	5.34421	5.73743
ENST00000550325.5_1	VDR	VDR-208	chr12:48236411-48298786	-	protein_coding	2.83682	7.14445	4.73965e-07	7.33285e-05	2.88343	0.0466056	0.079875	0.020271	0	6.36359	6.09084	6.69498
ENST00000521182.5_1	LY6E	LY6E-210	chr8:144099963-144103826	+	protein_coding	2.83159	7.1186	0.0272344	0.0827104	4.699	1.8674	0.513566	9.56765	2.03706	26.4427	20.4366	28.7875
ENST00000525685.5_1	CD44	CD44-219	chr11:35208409-35231612	+	protein_coding	2.83114	7.11637	0.00101769	0.00872549	2.83114	0	0	0	0	6.61606	9.18236	3.64726
ENST00000164227.9_1	BCL3	BCL3-201	chr19:45251804-45263301	+	protein_coding	2.82907	7.10618	1.23384e-05	0.000531842	3.88236	1.05328	0.84641	1.3738	1.0391	13.5245	13.5527	14.1731
ENST00000529029.1_1	YAP1	YAP1-207	chr11:102056812-102101310	+	protein_coding	2.82854	7.10355	0.00127942	0.0101861	4.1091	1.28056	1.13011	2.37217	0.995959	18.2979	11.1734	20.8761
ENST00000594925.1_1	GDF15	GDF15-202	chr19:18497730-18499294	+	processed_transcript	2.82601	7.0911	1.5364e-05	0.000605752	2.87939	0.0533823	0.117401	0	0	5.41276	6.76595	7.00038
ENST00000252229.6_2	MICB	MICB-201	chr6:31465892-31478901	+	protein_coding	2.82435	7.08296	0.00743165	0.0335245	3.61643	0.792081	1.24012	0.425866	0.625439	5.27369	12.2424	21.2063
ENST00000500169.6_1	LINC02377	LINC02377-201	chr4:132301168-132449276	+	lincRNA	2.81778	7.05075	0.000109156	0.0020791	2.81778	0	0	0	0	6.27719	4.56501	7.65521
ENST00000327367.8_1	SMAD3	SMAD3-201	chr15:67358183-67487533	+	protein_coding	2.81605	7.04232	1.09135e-07	3.27692e-05	5.80769	2.99164	7.32213	6.77673	6.77472	55.1034	55.0639	54.8716
ENST00000452684.2_2	SOD2	SOD2-206	chr6:160111951-160114276	-	protein_coding	2.81545	7.03937	1.06144e-05	0.000485531	4.27215	1.45671	2.06142	1.70649	1.49579	18.595	19.5232	16.9369
ENST00000522693.5_1	HAVCR1	HAVCR1-204	chr5:156456424-156486130	-	protein_coding	2.81384	7.03153	0.000215587	0.00320029	2.84209	0.0282568	0	0	0.060519	4.96119	8.678	5.39071
ENST00000400137.8_1	FKBP1A	FKBP1A-204	chr20:1349622-1373806	-	protein_coding	2.81309	7.02788	0.000293552	0.00388708	6.20503	3.39194	10.8679	6.60628	11.8139	73.7313	68.8985	75.8655
ENST00000584198.2_1	C1orf186	C1orf186-206	chr1:206279447-206285000	-	processed_transcript	2.8071	6.99875	0.000680016	0.00668785	2.83835	0.0312548	0	0	0.067151	7.36022	8.15608	3.77926
ENST00000443198.1_1	AC092447.7	AC092447.7-202	chr7:56494552-56516068	-	processed_transcript	2.80544	6.99071	5.01759e-05	0.00128045	2.80544	0	0	0	0	6.4724	7.03555	4.68968
ENST00000435080.5_1	BAG6	BAG6-244	chr6:31612094-31620163	-	protein_coding	2.80286	6.97823	0.0299957	0.0885943	2.84992	0.0470628	0.058545	0.024419	0.016986	21.5323	2.1491	4.28138
ENST00000278919.7_1	FEZ1	FEZ1-201	chr11:125315657-125366206	-	protein_coding	2.80055	6.96705	3.02604e-05	0.000917229	4.94886	2.14831	3.00685	4.13806	3.23171	27.1521	32.8518	29.9152
ENST00000447489.1_3	ANXA11	ANXA11-206	chr10:81915396-81921768	-	protein_coding	2.79939	6.96146	0.00510719	0.0259732	4.05404	1.25466	0.225192	2.91343	1.83338	16.3047	14.2545	16.3622
ENST00000560410.5_1	PSME2	PSME2-213	chr14:24612574-24615814	-	protein_coding	2.79874	6.95835	0.00389598	0.0215809	3.5546	0.755855	0.94808	0	1.47171	8.56691	9.14187	15.7199
ENST00000276500.4_2	RGS20	RGS20-201	chr8:54793454-54871834	+	protein_coding	2.79689	6.94941	0.000176563	0.0028128	2.86979	0.0729027	0	0	0.163691	7.24615	7.48264	4.5834
ENST00000585443.1_1	ICAM1	ICAM1-203	chr19:10392934-10394262	+	processed_transcript	2.79671	6.94855	8.88112e-05	0.00182972	2.79671	0	0	0	0	4.72262	7.67808	5.7556
ENST00000486083.6_1	DNAJB6	DNAJB6-214	chr7:157129698-157164921	+	processed_transcript	2.79547	6.94256	0.000443525	0.00508513	3.69811	0.902647	0.697838	0.73226	1.22158	15.4887	12.8581	8.56842
ENST00000397647.7_1	PAX8	PAX8-204	chr2:113973574-114036488	-	protein_coding	2.79488	6.93973	0.00171495	0.0123713	2.79488	0	0	0	0	10.3681	3.72443	5.22288
ENST00000587655.2_1	SBNO2	SBNO2-205	chr19:1127709-1169145	-	protein_coding	2.79365	6.93379	0.0024054	0.0155928	3.06293	0.269286	0.510517	0.09675	0.056712	12.7785	4.75478	6.35989
ENST00000610354.4_1	CD9	CD9-212	chr12:6309482-6347437	+	protein_coding	2.79353	6.93325	0.00120117	0.00976896	3.1489	0.355364	0.004696	0.302531	0.599936	9.60558	9.92511	5.02248
ENST00000376062.6_1	BCL2L1	BCL2L1-203	chr20:30252255-30310400	-	protein_coding	2.79159	6.92391	0.000314596	0.00405393	5.14768	2.35609	3.59851	3.47086	5.52757	32.2498	43.228	29.2919
ENST00000479238.1_1	WWTR1	WWTR1-209	chr3:149290651-149375222	-	protein_coding	2.78303	6.88295	1.29343e-05	0.000544717	3.01956	0.236536	0.172491	0.115455	0.250408	7.34127	6.14679	7.94531
ENST00000376055.8_1	BCL2L1	BCL2L1-202	chr20:30252255-30310663	-	protein_coding	2.77992	6.86816	0.000234626	0.00337604	3.79045	1.01053	1.48201	1.20525	0.493953	13.0148	13.0466	12.4574
ENST00000248244.5_2	TICAM1	TICAM1-201	chr19:4815944-4831716	-	protein_coding	2.7792	6.86473	3.52467e-07	6.44913e-05	4.14387	1.36466	1.4791	1.68758	1.56306	16.4469	16.2616	17.3436
ENST00000493403.1_1	ARPC1B	ARPC1B-221	chr7:98983992-98985866	+	processed_transcript	2.77771	6.85762	0.00530439	0.0266436	2.89578	0.118071	0	0.126138	0.135108	2.73892	8.70131	10.3651
ENST00000245479.2_1	SOX9	SOX9-201	chr17:70117161-70122561	+	protein_coding	2.77759	6.85708	1.3106e-08	9.38556e-06	5.29647	2.51887	4.72444	4.72082	4.74879	37.3318	39.0639	38.5252
ENST00000564288.5_2	MACF1	MACF1-231	chr1:39669918-39952849	+	protein_coding	2.77574	6.84827	0.000999511	0.00862838	3.36086	0.585115	0.666377	0.943616	0.042385	9.207	7.3487	11.7244
ENST00000406969.5_2	MED15	MED15-204	chr22:20861905-20941904	+	protein_coding	2.77236	6.83226	0.0227788	0.0730872	3.45308	0.680723	3.11864	0	0	14.0379	12.0605	5.68802
ENST00000541199.5_3	ADGRG6	ADGRG6-213	chr6:142623758-142691588	+	protein_coding	2.77218	6.8314	5.88133e-06	0.00033461	2.77218	0	0	0	0	5.27746	5.61087	6.68223
ENST00000413016.5_1	AK1	AK1-204	chr9:130630169-130635333	-	protein_coding	2.77185	6.82984	0.00584804	0.0284366	3.21746	0.445612	0	1.52597	0	5.89422	11.922	8.03327
ENST00000444636.5_1	SP140L	SP140L-204	chr2:231191899-231265339	+	protein_coding	2.77068	6.82428	1.27724e-06	0.000131961	2.78337	0.0126978	0	0.026756	0	6.46198	5.58608	5.63983
ENST00000471887.1_1	HDAC9	HDAC9-221	chr7:18542231-18557694	+	processed_transcript	2.77034	6.8227	0.00012119	0.00222073	2.95368	0.183342	0	0	0.464112	6.77144	7.09022	6.39574
ENST00000524144.5_1	LOXL2	LOXL2-214	chr8:23217603-23282804	-	protein_coding	2.77033	6.82266	0.0272509	0.082738	2.95876	0.18843	0	0.479684	0	11.5404	1.59927	13.4167
ENST00000322611.3_1	BASP1	BASP1-201	chr5:17217669-17276943	+	protein_coding	2.76474	6.79623	1.15319e-06	0.000125989	6.74269	3.97796	13.6683	14.9704	15.7016	107.433	103.391	107.501
ENST00000370055.5_1	L1CAM	L1CAM-203	chrX:153127408-153151608	-	protein_coding	2.76388	6.79223	0.0224526	0.0723365	2.76388	0	0	0	0	1.35413	10.7633	10.3156
ENST00000310594.7_1	WNT5B	WNT5B-201	chr12:1726222-1756377	+	protein_coding	2.76185	6.78267	0.00541953	0.0270113	2.76185	0	0	0	0	2.39965	9.53927	7.70878
ENST00000394485.4_1	MT1X	MT1X-201	chr16:56716336-56718108	+	protein_coding	2.76164	6.78168	0.00015767	0.0026209	6.63879	3.87715	14.9249	10.2637	16.687	102.328	94.5244	99.251
ENST00000527879.2_2	EID3	EID3-201	chr12:104697517-104698983	+	protein_coding	2.75642	6.75716	4.48631e-05	0.00118624	4.67682	1.9204	2.92933	3.07227	2.38952	26.8748	26.7169	20.6586
ENST00000415782.1_2	LAMB3	LAMB3-204	chr1:209807792-209824739	-	protein_coding	2.75541	6.75245	7.93169e-05	0.00170737	2.81887	0.0634531	0.119088	0.019623	0	7.62527	5.91425	4.89076
ENST00000582596.5_1	C1orf186	C1orf186-204	chr1:206279114-206288525	-	processed_transcript	2.7549	6.75004	0.000167627	0.00272106	2.7549	0	0	0	0	6.25394	7.23179	4.15052
ENST00000380846.3	AREGB	AREGB-001	chr4:75480629-75490486	+	protein_coding	2.75448	6.7481	1.27703e-06	0.000131961	2.81367	0.0591862	0.060716	0.066231	0	5.9814	6.50084	5.63655
ENST00000641012.1_1	MACF1	MACF1-234	chr1:39875938-39880221	+	protein_coding	2.75325	6.74236	2.89444e-08	1.55656e-05	4.58338	1.83012	2.59021	2.57698	2.5005	23.5116	22.3738	23.0492
ENST00000459688.1_1	EGFR	EGFR-208	chr7:55086824-55111742	+	processed_transcript	2.75235	6.73812	0.000987741	0.00855763	3.18243	0.430081	0.768886	0.350608	0.0237	10.6333	8.40611	5.83765
ENST00000491192.1_1	ANXA1	ANXA1-207	chr9:75783014-75785309	+	processed_transcript	2.75209	6.73693	3.90369e-05	0.00108934	3.12654	0.374447	0.34005	0.085988	0.496972	7.50413	7.57805	8.13118
ENST00000374809.6_1	TP53INP2	TP53INP2-201	chr20:33292143-33301243	+	protein_coding	2.75191	6.73608	0.0184827	0.0632485	3.38007	0.628161	0	0	2.6922	5.56332	13.6583	10.7301
ENST00000397752.7_1	MET	MET-202	chr7:116312446-116438440	+	protein_coding	2.75181	6.7356	0.000144209	0.00247689	5.56005	2.80825	4.82411	8.04786	5.52116	43.7774	47.328	47.5257
ENST00000388813.9_1	ADGRG1	ADGRG1-201	chr16:57662467-57698928	+	protein_coding	2.75083	6.73103	0.0209121	0.0688312	2.75083	0	0	0	0	11.3525	1.41241	9.2338
ENST00000366584.8_1	LGALS8	LGALS8-206	chr1:236686899-236714310	+	protein_coding	2.74898	6.72242	2.84581e-05	0.000881855	2.74898	0	0	0	0	4.73264	6.80578	5.789
ENST00000367284.9_1	ELF3	ELF3-203	chr1:201979645-201986316	+	protein_coding	2.74767	6.71629	1.74401e-05	0.000656474	2.74767	0	0	0	0	6.36979	6.16013	4.74134
ENST00000500945.2_1	ATG12	ATG12-202	chr5:115166370-115177262	-	protein_coding	2.74569	6.70709	6.79411e-06	0.000370063	2.74569	0	0	0	0	5.77262	6.43126	4.99491
ENST00000427177.5_1	SEPT9	SEPT9-203	chr17:75277492-75496674	+	protein_coding	2.74481	6.70299	0.0248145	0.0775033	4.04067	1.29586	0.705332	1.13383	3.06733	9.11364	41.6732	9.32813
ENST00000380946.3_1	KLF6	KLF6-202	chr10:3824000-3827375	-	processed_transcript	2.74433	6.7008	0.00181061	0.0128547	3.18722	0.442888	0.047487	1.08197	0.151712	6.44813	7.44265	11.0177
ENST00000228741.7_1	ELK3	ELK3-201	chr12:96588160-96663613	+	protein_coding	2.74327	6.69588	3.76095e-07	6.5477e-05	5.58563	2.84235	6.58303	5.90935	6.0408	46.0734	47.4878	47.5195
ENST00000452087.5_3	NUCB1	NUCB1-207	chr19:49403580-49422001	+	protein_coding	2.74266	6.69303	0.0210981	0.0692348	2.74407	0.00141081	0	0.002938	0	10.4232	1.38849	10.0213
ENST00000418546.1_1	AC016831.1	AC016831.1-203	chr7:130568868-130597956	-	lincRNA	2.7407	6.68393	0.00388597	0.0215443	2.7407	0	0	0	0	2.57374	8.93205	7.41266
ENST00000455193.1_2	LAMB3	LAMB3-205	chr1:209789926-209792143	-	protein_coding	2.73839	6.67324	1.3255e-05	0.000552663	2.73839	0	0	0	0	6.19416	4.76268	6.16814
ENST00000380839.8_1	ASL	ASL-203	chr7:65540853-65558131	+	protein_coding	2.73694	6.66655	4.95744e-05	0.00127503	3.28974	0.552798	0.258786	0.47736	0.697414	9.0726	7.79691	9.55497
ENST00000397988.7_1	SERPINB8	SERPINB8-204	chr18:61637353-61653887	+	protein_coding	2.73641	6.66411	0.00177	0.0126437	2.73641	0	0	0	0	3.14979	6.13745	8.99212
ENST00000264638.8_1	CNTNAP1	CNTNAP1-201	chr17:40834631-40851832	+	protein_coding	2.73625	6.66335	0.000702583	0.00683221	3.84966	1.11342	2.19573	0.799981	0.760666	12.1438	13.7657	14.4389
ENST00000519664.1_1	SYNPO	SYNPO-204	chr5:150020240-150031899	+	protein_coding	2.73499	6.65756	0.000104216	0.00202116	2.86842	0.133421	0	0.319749	0	7.03489	5.21008	6.80477
ENST00000252999.7_1	LAMA5	LAMA5-201	chr20:60884121-60942368	-	protein_coding	2.73252	6.64615	2.70444e-06	0.000206347	5.9879	3.25538	8.93926	8.33472	8.38519	66.246	57.1034	64.4245
ENST00000263277.7_1	EHD2	EHD2-201	chr19:48216600-48246391	+	protein_coding	2.73187	6.64317	3.26324e-05	0.00096205	4.51733	1.78546	1.92329	2.75008	2.73694	23.6783	20.4842	21.6527
ENST00000360274.8_1	PRKAR1B	PRKAR1B-201	chr7:589387-752209	-	protein_coding	2.73071	6.63781	0.00488508	0.0251817	3.21371	0.483006	1.73022	0	0	8.63051	8.44516	7.77836
ENST00000576360.1_1	CHRNB1	CHRNB1-208	chr17:7348850-7360634	+	protein_coding	2.72881	6.62907	4.42599e-06	0.00028578	2.72881	0	0	0	0	5.51122	6.35456	5.0833
ENST00000373312.3_1	FAM129B	FAM129B-201	chr9:130267622-130331367	-	protein_coding	2.72873	6.62872	8.62478e-07	0.000106237	6.04031	3.31158	9.14203	8.59477	9.05762	67.1239	60.6671	66.8563
ENST00000513831.1_3	OSMR	OSMR-205	chr5:38904500-38919668	+	protein_coding	2.72673	6.61954	8.6633e-07	0.000106385	2.72673	0	0	0	0	6.06279	5.21632	5.60656
ENST00000520969.5_3	MGAT4B	MGAT4B-216	chr5:179224671-179226636	-	protein_coding	2.7247	6.61021	0.00121052	0.00981122	5.34969	2.62499	7.05394	3.49977	5.47744	54.6831	34.4033	33.394
ENST00000398475.5_1	LAT2	LAT2-204	chr7:73624311-73640838	+	protein_coding	2.72409	6.60745	1.18695e-07	3.41268e-05	2.72409	0	0	0	0	5.8984	5.3984	5.53556
ENST00000368708.7_1	S100A2	S100A2-202	chr1:153533584-153538341	-	protein_coding	2.72243	6.59985	1.72309e-06	0.000160759	2.78074	0.0583038	0	0	0.128895	6.05052	5.9112	5.66012
ENST00000372839.7_2	YWHAB	YWHAB-202	chr20:43514352-43537173	+	protein_coding	2.72126	6.59446	0.0365389	0.101623	6.28125	3.55999	24.6437	13.9074	3.29149	141.015	60.8445	52.5667
ENST00000380633.1_1	TMSB4X	TMSB4X-201	chrX:12993777-12995200	+	protein_coding	2.70489	6.52009	0.000681702	0.00670005	3.82117	1.11628	0.577176	1.60053	1.48403	10.8789	12.5109	16.5954
ENST00000427699.5_1	ABCC3	ABCC3-202	chr17:48712218-48745284	+	protein_coding	2.7021	6.5075	0.00530316	0.0266396	2.7021	0	0	0	0	10.1124	2.46169	6.16388
ENST00000484488.5_1	PSMA7	PSMA7-205	chr20:60711859-60718496	-	processed_transcript	2.70186	6.5064	0.0290562	0.0865898	4.54537	1.84351	0.977582	9.95019	1.13454	25.1242	19.7861	22.4459
ENST00000520502.6_1	NRG1	NRG1-211	chr8:32505237-32600725	+	protein_coding	2.70061	6.50079	0.000477532	0.00534537	2.70061	0	0	0	0	5.58473	3.73423	7.81272
ENST00000360668.7_1	MAP1LC3A	MAP1LC3A-201	chr20:33145912-33148149	+	protein_coding	2.70018	6.49884	0.00154147	0.0115131	2.70018	0	0	0	0	3.00461	6.90917	7.66596
ENST00000470709.1_1	LAT2	LAT2-207	chr7:73624353-73635064	+	protein_coding	2.70014	6.49866	3.48008e-05	0.00100553	2.70014	0	0	0	0	5.1734	6.7732	4.71935
ENST00000489109.1_1	ANXA1	ANXA1-206	chr9:75775201-75780460	+	processed_transcript	2.69981	6.49717	0.000249553	0.00349829	3.12985	0.430034	0.504204	0.203056	0.351346	8.55212	9.50345	5.68499
ENST00000407045.3_1	MACROD2	MACROD2-204	chr20:15966433-16030714	+	protein_coding	2.69971	6.49671	2.0222e-06	0.000176437	2.76429	0.0645839	0.143734	0	0	5.81158	5.7201	5.85144
ENST00000460181.5_1	FPGS	FPGS-207	chr9:130565197-130576337	+	processed_transcript	2.6984	6.49082	0.000150618	0.00254521	3.85861	1.16021	1.16436	1.81292	0.833521	14.6563	12.2763	13.686
ENST00000307662.4_1	SYNPO	SYNPO-201	chr5:150020220-150038782	+	protein_coding	2.69795	6.48877	3.12278e-05	0.000935804	3.2095	0.511553	0.242401	0.620455	0.439063	8.46857	8.87942	7.46157
ENST00000554227.6_1	SNRPN	SNRPN-207	chr15:25200095-25223686	+	protein_coding	2.69793	6.48871	1.87602e-06	0.000169165	2.69793	0	0	0	0	5.3632	6.06113	5.08031
ENST00000368713.7_1	S100A3	S100A3-202	chr1:153519805-153521848	-	protein_coding	2.69653	6.48243	2.50878e-06	0.000197953	2.69653	0	0	0	0	4.89431	5.81681	5.77952
ENST00000219431.4_1	MPG	MPG-201	chr16:128256-135841	+	protein_coding	2.6951	6.47597	0.0448064	0.117224	4.16296	1.46786	0.626734	9.01972	0.298484	17.1344	15.8682	17.7911
ENST00000233143.5_1	TMSB10	TMSB10-201	chr2:85132749-85133799	+	protein_coding	2.69195	6.46188	2.07403e-07	4.69516e-05	10.7176	8.02562	259.279	255.477	264.076	1696.04	1610.08	1745.34
ENST00000538183.6_1	SOD2	SOD2-211	chr6:160090089-160114360	-	protein_coding	2.68472	6.42955	2.92337e-05	0.000896413	3.86005	1.17533	0.964222	1.57457	1.27788	13.4322	14.6004	12.5988
ENST00000349752.9_1	GALNT14	GALNT14-202	chr2:31133333-31361592	-	protein_coding	2.68265	6.42036	0.000218636	0.00322601	2.90736	0.224708	0.157995	0.092414	0.261356	7.18044	4.70666	8.04587
ENST00000264036.5_1	MCAM	MCAM-201	chr11:119179239-119187826	-	protein_coding	2.68127	6.4142	7.35389e-06	0.000388732	5.6507	2.96943	7.1879	6.02135	7.35731	47.5686	48.0935	52.175
ENST00000370435.4_1	OGFRL1	OGFRL1-201	chr6:71998506-72018653	+	protein_coding	2.67744	6.39722	6.36338e-06	0.000354543	5.94001	3.26257	8.8134	8.66179	8.32212	56.1028	67.8061	57.8954
ENST00000474223.1_1	SAT1	SAT1-207	chrX:23802870-23804117	+	processed_transcript	2.6773	6.39658	4.05145e-06	0.000270278	6.24035	3.56305	10.9743	11.865	9.71747	75.078	74.674	74.0569
ENST00000243346.9_1	NMI	NMI-201	chr2:152126979-152146571	-	protein_coding	2.67685	6.39459	3.15278e-06	0.000228089	3.27852	0.601669	0.564781	0.501158	0.487583	8.00058	9.59573	8.5807
ENST00000289893.8_1	MACF1	MACF1-201	chr1:39796810-39952659	+	protein_coding	2.67654	6.39321	0.036462	0.101479	4.36569	1.68915	3.89642	5.84816	0	21.7269	21.2682	16.3135
ENST00000462805.1_1	EPHA2	EPHA2-203	chr1:16459508-16460057	-	processed_transcript	2.67591	6.39043	0.000527486	0.00568625	3.04301	0.367103	0.238042	0.051385	0.648275	9.33815	7.11624	5.67297
ENST00000370032.9_1	HENMT1	HENMT1-202	chr1:109190917-109204148	-	protein_coding	2.67589	6.39035	0.000110495	0.00209707	2.67589	0	0	0	0	4.00516	6.31342	6.12911
ENST00000425169.1_3	TYMP	TYMP-205	chr22:50964214-50968419	-	protein_coding	2.67491	6.38599	0.00331017	0.019281	2.67491	0	0	0	0	9.74426	5.28554	2.85626
ENST00000423817.7_1	FXYD5	FXYD5-205	chr19:35645845-35660782	+	protein_coding	2.67117	6.36947	8.6628e-05	0.00180049	2.67117	0	0	0	0	4.52026	4.85576	6.99404
ENST00000641162.1_1	CASC19	CASC19-213	chr8:128197292-128213368	-	lincRNA	2.66751	6.35332	0.000282103	0.00378871	2.66751	0	0	0	0	5.79121	6.98556	3.72878
ENST00000478800.1_1	CDKN1A	CDKN1A-207	chr6:36646503-36652275	+	processed_transcript	2.66683	6.35031	0.000104161	0.00202061	2.8993	0.232472	0.059191	0.440383	0.062896	6.4262	7.34935	5.69743
ENST00000262580.8_1	GSDMD	GSDMD-201	chr8:144640477-144645232	+	protein_coding	2.66437	6.3395	0.000426213	0.00495084	2.66437	0	0	0	0	6.40931	3.49666	6.6471
ENST00000638331.1_1	PHLDB2	PHLDB2-216	chr3:111667818-111694779	+	protein_coding	2.66226	6.33023	0.00714585	0.0326352	3.19161	0.52935	0	1.92803	0.026776	8.30543	9.506	6.80072
ENST00000392662.5_2	ACTL6A	ACTL6A-201	chr3:179280708-179306186	+	protein_coding	2.65993	6.32002	0.0284125	0.085268	3.43727	0.777343	0.001808	0	4.02604	7.87168	12.0572	9.97259
ENST00000407501.6_1	TGIF1	TGIF1-207	chr18:3449880-3458347	+	protein_coding	2.65761	6.30987	0.00678345	0.0314782	3.62874	0.971125	0	2.32497	1.26582	10.3104	12.5941	11.3097
ENST00000555952.5_1	FRMD6	FRMD6-212	chr14:52021378-52046015	+	processed_transcript	2.65524	6.2995	5.63209e-06	0.00032836	2.71907	0.0638361	0.141957	0	0	5.82765	5.83133	5.12057
ENST00000493099.1_1	GUCD1	GUCD1-212	chr22:24938798-24940051	-	processed_transcript	2.65378	6.29316	3.36468e-05	0.000981589	3.17066	0.516879	0.629036	0.329169	0.352936	7.02033	8.91554	8.18089
ENST00000301244.11_1	SPINT2	SPINT2-201	chr19:38755098-38783254	+	protein_coding	2.65226	6.28653	0.000270725	0.00368888	5.24662	2.59435	5.06595	5.59974	4.50183	32.1931	31.6265	49.5299
ENST00000567527.1_1	AC124312.3	AC124312.3-201	chr15:25332808-25334043	+	lincRNA	2.65077	6.28003	9.25668e-09	8.02075e-06	2.65077	0	0	0	0	5.28521	5.40382	5.15354
ENST00000258534.12_1	DRAM1	DRAM1-201	chr12:102271129-102317401	+	protein_coding	2.6497	6.27538	2.51332e-05	0.000817181	3.44972	0.800018	0.995967	0.735843	0.523438	9.7498	10.5688	9.48866
ENST00000472147.1_1	ITGB1	ITGB1-209	chr10:33218913-33225179	-	protein_coding	2.64929	6.27357	1.05197e-05	0.000482078	3.03637	0.387079	0.257071	0.345957	0.321832	8.00092	7.45031	6.26026
ENST00000486173.1_1	PTPN14	PTPN14-203	chr1:214638045-214725792	-	processed_transcript	2.64813	6.26852	7.47704e-05	0.00164377	4.82493	2.17681	2.86818	3.95062	3.82711	32.0234	25.5944	24.9261
ENST00000462537.3_1	CDKN1A	CDKN1A-206	chr6:36646548-36648634	+	processed_transcript	2.64812	6.26851	0.00066034	0.00657056	4.02321	1.37509	0.883922	1.57193	2.60168	16.5963	14.8174	14.4442
ENST00000640975.1_1	PAX6	PAX6-282	chr11:31810750-31833890	-	protein_coding	2.64733	6.26507	0.000233385	0.00336595	2.84758	0.200249	0	0	0.516501	6.43737	5.56463	6.63821
ENST00000346248.7_1	CHST15	CHST15-201	chr10:125767184-125851970	-	protein_coding	2.64615	6.25997	0.0134267	0.0505042	3.26605	0.619892	0	0	2.62927	8.84987	9.56756	7.55322
ENST00000371489.5_1	MYOF	MYOF-204	chr10:95156942-95242074	-	protein_coding	2.64471	6.25371	0.000243389	0.00344687	2.64471	0	0	0	0	4.16735	7.36678	4.65701
ENST00000423556.6_3	ELMSAN1	ELMSAN1-204	chr14:74185546-74206958	-	protein_coding	2.64205	6.2422	0.0044302	0.0235902	4.01965	1.3776	1.38823	1.38657	2.07783	25.6573	8.31461	16.1842
ENST00000374116.3_1	HMGA1	HMGA1-203	chr6:34206568-34214007	+	protein_coding	2.63763	6.2231	9.51751e-05	0.00191218	4.09125	1.45362	1.81418	1.91084	1.50829	19.9576	13.6435	15.1355
ENST00000357066.7_1	MOB3A	MOB3A-201	chr19:2071037-2096331	-	protein_coding	2.63762	6.22304	1.03004e-05	0.000477835	5.12284	2.48522	4.47785	5.24011	4.13537	36.244	32.8429	32.5628
ENST00000395003.5_2	JADE2	JADE2-203	chr5:133861798-133918920	+	protein_coding	2.63709	6.22075	1.8484e-05	0.000678288	2.79456	0.157473	0	0.278556	0.085156	5.60109	6.01944	6.20813
ENST00000360031.6_2	ENTPD6	ENTPD6-202	chr20:25176337-25207365	+	protein_coding	2.63549	6.21387	0.00869909	0.0373881	3.34649	0.710996	2.43265	0.277803	0	8.19043	9.23554	10.1875
ENST00000620230.4_1	ADRM1	ADRM1-205	chr20:60877952-60883916	+	protein_coding	2.63547	6.21376	0.00053497	0.00573576	4.93225	2.29678	5.68699	2.77691	3.69713	31.7328	31.7257	25.5699
ENST00000362011.6_1	SHISA4	SHISA4-201	chr1:201857836-201861434	+	protein_coding	2.63176	6.19781	8.41856e-05	0.00176924	2.93698	0.30522	0.330666	0.400839	0.012007	5.95394	7.1863	6.88929
ENST00000614186.5_2	MDFIC	MDFIC-208	chr7:114562472-114655989	+	protein_coding	2.62992	6.18991	0.000370344	0.00450581	3.71569	1.08577	1.07668	1.17822	1.11387	15.2179	8.52958	13.6736
ENST00000513042.6_1	ARHGEF28	ARHGEF28-212	chr5:72921983-73237817	+	protein_coding	2.62896	6.18581	0.000285549	0.00382323	2.62896	0	0	0	0	5.9855	6.42526	3.56332
ENST00000559780.5_1	ANXA2	ANXA2-225	chr15:60653141-60690173	-	protein_coding	2.62735	6.17889	0.000134705	0.00238411	3.27309	0.645741	0.458645	0.31705	0.993474	8.53107	9.06652	8.41612
ENST00000340833.4_2	CDC25B	CDC25B-202	chr20:3777078-3785865	+	protein_coding	2.62382	6.16382	0.0043831	0.0234204	5.54259	2.91877	3.29885	10.0236	8.12502	54.3797	48.9416	35.6139
ENST00000538213.6_1	SLC16A5	SLC16A5-203	chr17:73089382-73100505	+	protein_coding	2.62126	6.15286	0.00404089	0.0221267	2.7802	0.158945	0	0.174839	0.184576	10.4668	5.99401	3.04206
ENST00000397500.5_1	PISD	PISD-203	chr22:32014600-32026817	-	protein_coding	2.62086	6.15117	0.0154878	0.055943	3.3038	0.682938	0.01739	2.93573	0.033337	8.85778	8.61843	9.1565
ENST00000469648.5_1	DCBLD2	DCBLD2-205	chr3:98541153-98619833	-	processed_transcript	2.61986	6.1469	0.000195704	0.003001	3.81668	1.19682	1.49284	1.42653	0.991411	16.0572	13.4867	10.3223
ENST00000568816.5_1	BLOC1S6	BLOC1S6-218	chr15:45879789-45901908	+	protein_coding	2.61884	6.14254	0.00165747	0.012092	2.79029	0.171451	0.227513	0.05549	0.102441	4.15487	10.0456	4.81398
ENST00000317744.9_1	WSCD1	WSCD1-201	chr17:5973934-6027745	+	protein_coding	2.61798	6.1389	0.0261186	0.0803281	4.54766	1.92968	0.581509	5.02577	4.80216	12.1119	30.0012	30.4704
ENST00000540844.5_1	CCT8	CCT8-211	chr21:30428643-30446118	-	protein_coding	2.61296	6.11758	0.0325526	0.0937301	2.79512	0.182158	0.002394	0.295229	0.124916	1.96869	4.65247	18.9269
ENST00000553967.1_1	TUBB3	TUBB3-203	chr16:89989774-90000409	+	protein_coding	2.61262	6.11615	7.8864e-05	0.00169957	2.93669	0.324068	0.44727	0.165287	0.16327	7.97258	6.34781	5.80804
ENST00000394957.7_1	VSIR	VSIR-201	chr10:73507316-73533255	-	protein_coding	2.61195	6.11329	2.47139e-07	5.2373e-05	2.8451	0.233153	0.139138	0.23553	0.153795	6.25558	6.11981	6.18197
ENST00000370858.3_1	PSMA7	PSMA7-201	chr20:60714387-60718486	-	protein_coding	2.61109	6.10967	0.00173187	0.0124457	4.66666	2.05556	4.02207	4.4943	1.60354	23.2447	27.5926	22.6343
ENST00000411486.6_1	HJURP	HJURP-202	chr2:234745349-234763212	-	protein_coding	2.61089	6.10882	0.0388433	0.10617	5.41438	2.80349	2.16756	4.9097	17.1766	21.9686	56.364	57.8711
ENST00000340192.11_1	ERCC1	ERCC1-203	chr19:45912872-45927097	-	protein_coding	2.61072	6.10809	0.000222386	0.00327173	3.01231	0.401584	0.182923	0.136694	0.71422	7.16942	6.2702	7.84392
ENST00000600428.5_1	TRIP10	TRIP10-210	chr19:6737936-6751511	+	protein_coding	2.60973	6.10391	2.39617e-05	0.000792596	2.60973	0	0	0	0	5.20061	4.26562	5.9653
ENST00000373886.7_1	BICC1	BICC1-202	chr10:60272900-60591197	+	protein_coding	2.60842	6.09835	1.96218e-07	4.51192e-05	5.06029	2.45187	4.34386	4.60881	4.46425	31.8529	33.7095	31.574
ENST00000557103.5_1	FRMD6	FRMD6-215	chr14:52021387-52042923	+	processed_transcript	2.60629	6.08935	9.06661e-06	0.000444394	2.60629	0	0	0	0	5.09346	5.79465	4.45359
ENST00000361818.9_1	MAP2K3	MAP2K3-203	chr17:21191348-21218525	+	protein_coding	2.6061	6.08855	0.00146958	0.0111688	4.87219	2.26609	5.42567	2.7471	3.6224	19.8196	33.083	34.4008
ENST00000409318.1_2	TBC1D8	TBC1D8-202	chr2:101624079-101767846	-	protein_coding	2.605	6.0839	0.00921144	0.0388995	3.00589	0.400898	0.442451	0.305041	0.222706	11.6681	2.77695	9.83282
ENST00000311734.6_1	IL1RL1	IL1RL1-202	chr2:102953608-102962560	+	protein_coding	2.60133	6.06845	0.0188471	0.0641375	2.60133	0	0	0	0	2.25681	3.4742	14.3365
ENST00000428075.5_2	TRIOBP	TRIOBP-209	chr22:38142277-38154142	+	protein_coding	2.60122	6.06799	0.00227552	0.0150327	2.97203	0.370813	0	0	1.16211	7.45385	6.36422	6.75945
ENST00000296932.12_3	ADGRG6	ADGRG6-202	chr6:142623066-142767385	+	protein_coding	2.60073	6.06594	0.00140028	0.0107977	2.99484	0.394104	0	0.098225	1.06643	7.27222	6.81962	6.83066
ENST00000263734.4_1	EPAS1	EPAS1-201	chr2:46524541-46613842	+	protein_coding	2.59847	6.05644	0.000406974	0.00479439	4.66381	2.06534	3.78358	2.94328	2.8867	20.8904	33.3261	20.6753
ENST00000379883.2_1	DDX58	DDX58-202	chr9:32455703-32526322	-	protein_coding	2.59767	6.05308	0.000644429	0.00645834	3.89669	1.29902	1.44579	1.47157	1.46457	18.8801	14.8181	9.50729
ENST00000291107.6_1	ABR	ABR-201	chr17:909148-1012340	-	protein_coding	2.59742	6.05203	0.00227192	0.0150168	4.92657	2.32915	4.82764	5.90508	2.15332	34.5253	30.6876	23.9865
ENST00000360202.9_1	KIRREL2	KIRREL2-203	chr19:36347824-36358011	+	protein_coding	2.5974	6.05197	1.47544e-06	0.000144659	2.61476	0.0173583	0.036755	0	0	5.3936	4.67489	5.33378
ENST00000338380.2_1	SLPI	SLPI-201	chr20:43880880-43883205	-	protein_coding	2.5972	6.0511	1.14817e-05	0.000508241	2.5972	0	0	0	0	4.73996	4.58319	5.91372
ENST00000605249.1_1	AC016831.5	AC016831.5-201	chr7:130614968-130616965	-	lincRNA	2.59607	6.04636	3.16336e-05	0.000942758	3.65602	1.05996	0.917135	1.22366	1.12577	12.773	12.3816	9.86884
ENST00000586839.1_1	AES	AES-207	chr19:3053589-3061402	-	protein_coding	2.59399	6.03767	0.00103402	0.0088269	4.30411	1.71011	2.11211	3.68588	1.40182	20.8893	15.8437	19.9086
ENST00000549887.1_1	SOCS2	SOCS2-209	chr12:93965676-93968842	+	protein_coding	2.59392	6.03739	0.000266333	0.00365262	2.59392	0	0	0	0	3.99122	7.08815	4.45119
ENST00000368107.1_1	DUSP23	DUSP23-201	chr1:159750793-159752333	+	protein_coding	2.59376	6.03668	0.0012246	0.00989494	3.00655	0.412791	0.564926	0.334039	0.130121	7.76121	4.49661	9.77762
ENST00000345877.6_1	YAP1	YAP1-202	chr11:101981192-102104154	+	protein_coding	2.59335	6.035	7.33458e-06	0.00038849	5.18462	2.59126	4.8762	5.52838	4.70482	34.8932	38.4543	32.9678
ENST00000273067.4_1	MARCH4	MARCH4-201	chr2:217122588-217236750	-	protein_coding	2.59137	6.02669	1.91356e-07	4.51192e-05	2.59137	0	0	0	0	5.32102	4.91376	4.85579
ENST00000270443.8_1	ZNF702P	ZNF702P-201	chr19:53471504-53496777	-	processed_transcript	2.58856	6.01497	0.006132	0.0293626	2.59153	0.00296711	0.006189	0	0	6.8453	8.07841	2.07441
ENST00000566181.2_1	STUB1	STUB1-207	chr16:731224-732213	+	processed_transcript	2.58766	6.01121	0.0417312	0.111631	3.39456	0.80691	0.752389	2.05549	0	16.7355	16.4338	2.7615
ENST00000568396.2_1	NUTF2	NUTF2-205	chr16:67881114-67905226	+	protein_coding	2.58671	6.00726	0.00378884	0.0211804	3.58301	0.996304	2.317	0.313376	0.822289	13.6434	11.1764	8.65206
ENST00000393893.5_1	CORO1B	CORO1B-202	chr11:67205519-67211292	-	protein_coding	2.58559	6.00261	2.33737e-05	0.000780968	2.64432	0.0587264	0.021495	0.093066	0.011935	5.40866	4.42202	6.03277
ENST00000262650.10_3	ITCH	ITCH-201	chr20:32951118-33095840	+	protein_coding	2.58398	5.99594	0.0467549	0.12071	4.05369	1.4697	0	6.54829	1.81466	25.7141	12.2152	11.9727
ENST00000475269.5_2	RBCK1	RBCK1-213	chr20:388722-391408	+	protein_coding	2.58394	5.99577	0.000923404	0.00817593	4.23353	1.64959	3.59975	1.7764	1.4183	20.102	16.6175	16.9057
ENST00000622683.4_1	ARHGAP23	ARHGAP23-222	chr17:36584662-36668628	+	protein_coding	2.58334	5.99324	6.86277e-05	0.00155779	3.09999	0.516658	0.204026	0.452404	0.674422	8.13101	7.74067	6.89786
ENST00000579584.5_1	MYO1D	MYO1D-206	chr17:30921221-31204162	-	protein_coding	2.58252	5.98983	0.000299392	0.00393058	2.70514	0.122628	0.134472	0.061413	0.071683	4.61363	7.81727	4.60286
ENST00000638119.1_1	KIF1BP	KIF1BP-214	chr10:70748506-70776685	+	protein_coding	2.57991	5.97901	0.0388469	0.106174	2.96909	0.389185	0.010181	1.00144	0.111035	12.3157	12.8428	1.60477
ENST00000329305.6_2	TPM2	TPM2-201	chr9:35682011-35689910	-	protein_coding	2.57955	5.97754	4.3916e-05	0.00117188	3.60404	1.02448	0.760118	1.00364	1.38693	10.4637	11.7046	11.3448
ENST00000550465.5_1	PIP4K2C	PIP4K2C-207	chr12:57985026-57995662	+	protein_coding	2.57922	5.97616	0.0020076	0.0137695	2.85515	0.275931	0.667912	0.064185	0	4.05348	8.66803	6.75404
ENST00000418160.5_1	FLOT1	FLOT1-204	chr6:30707938-30710134	-	protein_coding	2.57821	5.97196	0.00016364	0.00268543	2.7642	0.185997	0.317817	0.012195	0.103704	4.72526	7.21379	5.66783
ENST00000468639.5_1	ANXA1	ANXA1-205	chr9:75766781-75774795	+	processed_transcript	2.57783	5.97042	0.00280447	0.0172501	3.00788	0.430044	0.157232	0.115644	0.894183	5.62355	11.3012	5.38769
ENST00000619747.1_1	LAPTM4B	LAPTM4B-204	chr8:98787285-98864826	+	protein_coding	2.57543	5.9605	0.00696279	0.0320402	3.65829	1.08285	0.115959	1.96453	1.87283	13.9757	13.046	8.56802
ENST00000546542.1_1	KRT8	KRT8-202	chr12:53298460-53300844	-	protein_coding	2.57444	5.95642	0.00078964	0.00737898	2.84694	0.272494	0	0.762327	0	6.88859	5.7113	6.03453
ENST00000381715.3_1	FKBP1A	FKBP1A-201	chr20:1352422-1373606	-	protein_coding	2.57412	5.95509	0.000135353	0.00239181	4.43544	1.86132	3.2535	2.71667	2.03417	24.1688	18.9453	19.1791
ENST00000279247.10_1	CAPN1	CAPN1-201	chr11:64949343-64979476	+	protein_coding	2.57118	5.94296	0.015849	0.0568043	4.05769	1.48651	1.24664	1.79749	2.50063	24.8735	6.12897	24.0366
ENST00000622179.4_2	SIRPA	SIRPA-204	chr20:1875154-1921238	+	protein_coding	2.57105	5.94242	1.28966e-05	0.000543812	3.35922	0.788173	0.830626	0.586209	0.773501	9.33995	10.1999	8.33147
ENST00000513206.5_1	TRIO	TRIO-221	chr5:14291086-14532237	+	protein_coding	2.57026	5.93918	0.00188165	0.0131909	2.9224	0.352137	0	1.07975	0	6.63571	6.40733	6.70336
ENST00000403716.5_1	PLEKHB2	PLEKHB2-202	chr2:131862420-131907424	+	protein_coding	2.5686	5.93232	0.04645	0.120168	3.1223	0.553701	0.137281	0.132852	1.45471	5.15566	25.5071	3.04649
ENST00000420713.1_1	ZNF716	ZNF716-201	chr7:57509883-57533252	+	protein_coding	2.56487	5.91702	7.29467e-07	9.43228e-05	2.56487	0	0	0	0	4.66852	5.31679	4.78552
ENST00000489377.1_1	MSANTD3	MSANTD3-205	chr9:103204431-103213511	+	processed_transcript	2.56397	5.91335	0.00013339	0.0023692	3.75353	1.18956	0.968178	1.27671	1.64793	10.4685	12.7672	14.5392
ENST00000367468.9_1	PTGS2	PTGS2-201	chr1:186640923-186649559	-	protein_coding	2.56341	5.91101	0.000398624	0.00472253	3.56072	0.997311	0.990221	1.13245	0.874481	12.8152	12.8329	7.59757
ENST00000410023.5_1	IL1R1	IL1R1-205	chr2:102759246-102796334	+	protein_coding	2.56212	5.90574	0.00525812	0.0264781	2.93629	0.374171	0.285008	0.281041	0.322638	8.81201	10.3007	3.04453
ENST00000559313.5_1	C15orf52	C15orf52-206	chr15:40625958-40633168	-	protein_coding	2.56134	5.90255	0.00301691	0.0181058	2.76617	0.204831	0.442226	0.040733	0.020019	5.73583	3.41532	9.58637
ENST00000537763.5_1	RAB19	RAB19-203	chr7:140103843-140126050	+	protein_coding	2.56098	5.90107	3.6503e-05	0.00103839	2.79892	0.237942	0	0.237766	0.325088	5.88249	6.30585	5.70286
ENST00000373017.5_3	LCN2	LCN2-203	chr9:130911350-130915412	+	protein_coding	2.55922	5.8939	0.000344481	0.00430839	2.55922	0	0	0	0	5.83934	5.9436	3.31132
ENST00000630662.2_1	ALDH3A2	ALDH3A2-225	chr17:19552119-19579055	+	protein_coding	2.55896	5.89282	0.000161752	0.00266525	2.55896	0	0	0	0	3.78586	4.73086	6.46087
ENST00000453013.5_1	TFPI	TFPI-210	chr2:188361611-188419219	-	protein_coding	2.55841	5.89058	0.000427994	0.00496444	3.43812	0.879714	0.332307	1.10192	1.22454	10.0758	9.18401	10.2886
ENST00000274203.13_1	MYO10	MYO10-201	chr5:16662023-16936385	-	protein_coding	2.558	5.88893	0.00932618	0.0392434	3.20294	0.644933	1.84014	0.163678	0.156804	9.09471	12.0201	4.94064
ENST00000259808.8_1	RIPK1	RIPK1-201	chr6:3068658-3115419	+	protein_coding	2.55706	5.88508	0.0355055	0.099574	2.92239	0.36533	0.336594	0.256424	0.272889	11.6552	1.44017	13.109
ENST00000225696.8_2	NUP88	NUP88-201	chr17:5289422-5322786	-	protein_coding	2.55364	5.87112	0.000271455	0.00369642	2.55364	0	0	0	0	5.75912	3.37753	5.83982
ENST00000613183.1_1	MSANTD3	MSANTD3-206	chr9:103191796-103213993	+	protein_coding	2.55285	5.86792	0.00619383	0.0295554	3.74711	1.19426	0.636637	0.655095	3.42331	10.9809	13.8794	12.58
ENST00000456986.5_2	NEDD4L	NEDD4L-209	chr18:55714458-56068772	+	protein_coding	2.55158	5.86278	2.22979e-06	0.000185735	2.55158	0	0	0	0	5.05939	5.18574	4.37638
ENST00000550788.1_3	NAV3	NAV3-211	chr12:78516042-78593194	+	protein_coding	2.54924	5.85324	0.008574	0.0370418	2.54924	0	0	0	0	2.98795	3.12277	11.197
ENST00000258415.8_1	CYP27A1	CYP27A1-201	chr2:219646479-219680016	+	protein_coding	2.54923	5.85322	2.4801e-05	0.000810754	2.57548	0.026247	0	0.056096	0	5.22043	4.12526	5.64281
ENST00000370473.4_1	GBP1	GBP1-201	chr1:89518002-89531043	-	protein_coding	2.54814	5.8488	1.51797e-05	0.000601951	2.67045	0.122306	0.177902	0.03028	0.062646	4.8119	6.08806	5.26337
ENST00000311320.8_2	RIN1	RIN1-201	chr11:66099533-66104000	-	protein_coding	2.54588	5.83965	0.0055139	0.0273137	2.56635	0.0204676	0	0	0.04348	10.3003	3.43922	3.14236
ENST00000506827.1_1	ITGA3	ITGA3-209	chr17:48153989-48167845	+	protein_coding	2.54442	5.83375	0.000145507	0.00248892	2.6608	0.116377	0.273793	0	0	6.45344	4.35936	5.33099
ENST00000606993.1_1	AL390719.2	AL390719.2-201	chr1:1104737-1105723	+	lincRNA	2.54382	5.83131	2.19847e-08	1.29441e-05	2.54382	0	0	0	0	4.73517	4.76987	4.99221
ENST00000550697.5_1	MYL6	MYL6-218	chr12:56551945-56555358	+	protein_coding	2.54233	5.8253	6.23361e-05	0.00146747	4.9014	2.35907	4.74822	3.92102	3.77377	24.3627	31.9338	30.9571
ENST00000525201.5_1	TSPAN4	TSPAN4-214	chr11:844153-866676	+	protein_coding	2.54024	5.81685	0.00185066	0.0130444	2.54024	0	0	0	0	3.9731	8.32651	3.24343
ENST00000302754.5_1	JUNB	JUNB-201	chr19:12902310-12904129	+	protein_coding	2.53935	5.81326	1.86831e-06	0.000168672	5.70357	3.16422	8.01179	7.52507	8.37713	49.869	49.1896	54.4333
ENST00000407693.6_3	PTGR1	PTGR1-205	chr9:114325247-114362135	-	protein_coding	2.53637	5.80127	0.000702704	0.00683221	2.53637	0	0	0	0	3.31201	4.53597	7.17889
ENST00000373826.3_2	RAB42	RAB42-201	chr1:28918712-28921955	+	protein_coding	2.53599	5.79977	1.52263e-05	0.000603161	2.57851	0.0425105	0.092423	0	0	5.46171	4.26333	5.26633
ENST00000639623.1_1	EPB41L2	EPB41L2-233	chr6:131202722-131277601	-	processed_transcript	2.53569	5.79855	3.69702e-05	0.00104616	2.53569	0	0	0	0	3.91079	5.62305	4.99445
ENST00000417030.2_4	CKLF	CKLF-205	chr16:66586485-66600146	+	protein_coding	2.53506	5.796	0.00858986	0.0370886	4.21728	1.68222	3.99104	0.835919	2.60708	18.4013	25.4371	11.547
ENST00000361007.6_1	MYO1C	MYO1C-202	chr17:1367482-1394972	-	protein_coding	2.53331	5.78897	5.62212e-08	2.19823e-05	6.82903	4.29572	18.749	18.4239	18.749	112.58	109.575	116.023
ENST00000264933.8_1	PDCD6	PDCD6-201	chr5:271736-315089	+	protein_coding	2.53307	5.78801	0.000611798	0.00623181	4.73107	2.198	3.91486	4.94921	2.30385	25.4463	23.5385	27.8646
ENST00000620123.4_1	TAP2	TAP2-205	chr6:32793187-32806547	-	protein_coding	2.53216	5.78437	0.000489679	0.00542852	3.19579	0.663627	0.474524	0.757529	0.533771	9.32748	10.1772	5.66432
ENST00000425019.5_1	MAP4K4	MAP4K4-210	chr2:102314206-102507958	+	protein_coding	2.53182	5.78299	0.044772	0.117172	4.28516	1.75335	0	5.47454	4.91862	18.4322	18.4853	18.573
ENST00000299977.8_1	SLFN5	SLFN5-201	chr17:33570055-33600674	+	protein_coding	2.53164	5.78227	9.25249e-07	0.000109324	3.67788	1.14625	1.2727	1.2255	1.14384	11.8841	12.4392	11.1069
ENST00000268489.9_1	ZFHX3	ZFHX3-201	chr16:72816784-73082274	-	protein_coding	2.52867	5.77041	0.0111834	0.0444836	3.10267	0.573998	0.033167	0.016426	2.14142	5.82645	9.40668	7.92246
ENST00000302342.3_1	ZNF217	ZNF217-201	chr20:52183612-52199636	-	protein_coding	2.52648	5.76166	1.21015e-07	3.43634e-05	5.79006	3.26357	8.25079	8.73577	8.8345	53.7956	55.3104	53.9047
ENST00000368315.8_1	ARHGEF2	ARHGEF2-204	chr1:155917158-155922512	-	protein_coding	2.52478	5.75485	0.0227072	0.0729277	4.18896	1.66418	1.16894	7.21206	0.787335	18.3142	14.6004	19.137
ENST00000467852.1_1	VPS26A	VPS26A-204	chr10:70884002-70928384	+	processed_transcript	2.52393	5.75147	0.0245578	0.0768957	3.84716	1.32323	2.89962	3.01763	0	15.1813	8.86734	17.6688
ENST00000610329.4_2	GOLGA2	GOLGA2-213	chr9:131018111-131038217	-	protein_coding	2.52157	5.74205	0.030207	0.0890171	3.96824	1.44667	4.90274	2.431	0	16.0215	12.3614	15.8588
ENST00000635997.1_1	NEDD4L	NEDD4L-238	chr18:55922672-56063937	+	protein_coding	2.52118	5.7405	0.000252008	0.00351998	2.96335	0.442174	0.701106	0.311126	0.124468	8.04648	6.38591	6.10049
ENST00000395148.6_1	CFLAR	CFLAR-206	chr2:201981130-202004600	+	protein_coding	2.52102	5.73986	2.27908e-06	0.000188096	3.63245	1.11144	0.994306	1.23187	1.26604	11.8103	11.2056	11.1988
ENST00000389045.7_1	TRIP12	TRIP12-204	chr2:230632157-230786619	-	protein_coding	2.52004	5.73597	0.0215439	0.0702756	5.19095	2.67091	2.62205	3.36428	15.3384	35.3458	39.0736	32.4643
ENST00000494317.1_1	LCN2	LCN2-207	chr9:130913948-130915732	+	processed_transcript	2.51752	5.72597	0.000225084	0.00329535	2.51752	0	0	0	0	5.96427	3.3872	5.14447
ENST00000446718.1_1	AVL9	AVL9-203	chr7:32582867-32628323	+	protein_coding	2.51748	5.7258	0.000272463	0.00370612	2.51748	0	0	0	0	4.03534	6.6457	3.87597
ENST00000334895.9_1	TPM1	TPM1-204	chr15:63340565-63362831	+	protein_coding	2.51526	5.717	1.57353e-07	4.14753e-05	2.88289	0.367631	0.295273	0.314904	0.261096	6.64585	6.18765	6.30291
ENST00000355327.7_2	THSD4	THSD4-202	chr15:71389291-72075722	+	protein_coding	2.51493	5.71569	2.28749e-07	4.97883e-05	3.97621	1.46128	1.73018	1.67542	1.85816	15.2031	14.5161	14.5058
ENST00000360595.7_1	MEF2D	MEF2D-202	chr1:156436002-156460391	-	protein_coding	2.51451	5.71403	0.0139631	0.0519542	2.96832	0.453814	0.040059	1.41728	0.021997	12.6182	3.74054	6.42533
ENST00000527303.1_1	PLEC	PLEC-211	chr8:144996100-145001179	-	protein_coding	2.51304	5.70822	4.59553e-06	0.00029284	3.98797	1.47493	1.63701	1.68971	2.02815	14.0242	15.514	15.101
ENST00000513492.5_1	LUCAT1	LUCAT1-202	chr5:90598846-90608312	-	lincRNA	2.51291	5.7077	0.00233205	0.0152748	2.51291	0	0	0	0	7.15735	2.50034	5.51215
ENST00000591504.5_1	CCDC68	CCDC68-204	chr18:52568740-52626739	-	protein_coding	2.50674	5.68334	7.90413e-05	0.0017029	2.64136	0.134627	0	0.153809	0.14669	4.25092	6.26915	5.36313
ENST00000550503.1_3	NAV3	NAV3-209	chr12:78360056-78400546	+	protein_coding	2.5053	5.67767	0.00011433	0.00214513	2.5053	0	0	0	0	5.79347	4.88875	3.57506
ENST00000379253.7_1	SAT1	SAT1-202	chrX:23801290-23802528	+	protein_coding	2.50453	5.67465	1.14601e-05	0.000508181	4.41466	1.91013	2.42666	3.12412	2.7568	18.9244	21.5636	20.5796
ENST00000420087.2	CT45A4	CT45A4-201	chrX:134928697-134953994	-	protein_coding	2.5036	5.671	1.04918e-05	0.000481783	2.5036	0	0	0	0	5.23058	4.82123	4.02846
ENST00000392062.6_1	RHBDD1	RHBDD1-202	chr2:227700671-227863917	+	protein_coding	2.50322	5.66949	2.891e-07	5.7051e-05	2.56821	0.0649906	0	0.054733	0.0853	4.85568	5.0387	4.89933
ENST00000547772.1_1	PXN	PXN-213	chr12:120664458-120703540	-	processed_transcript	2.49832	5.65027	0.000445983	0.00510646	2.90188	0.403562	0	0.661716	0.392824	5.53963	6.9939	6.98633
ENST00000420009.5_3	TNFAIP3	TNFAIP3-202	chr6:138188459-138196172	+	protein_coding	2.49637	5.64263	0.000633774	0.00638125	2.71995	0.223587	0	0.591912	0	6.38907	4.53501	5.99287
ENST00000323492.11_1	CASP8	CASP8-203	chr2:202125223-202152432	+	protein_coding	2.49034	5.61911	0.000651372	0.00650889	2.50686	0.0165208	0	0	0.034951	5.42122	6.15675	2.99567
ENST00000478348.1_1	S100A10	S100A10-203	chr1:151957634-151966305	-	processed_transcript	2.48937	5.61533	0.00128178	0.0101954	2.78464	0.295271	0.287913	0.415591	0.013519	8.45876	6.03903	3.91399
ENST00000322716.7_1	EPM2AIP1	EPM2AIP1-201	chr3:37026534-37034659	-	protein_coding	2.48931	5.6151	1.17348e-06	0.000126986	2.49755	0.00823768	0	0.011385	0.005826	4.53929	5.05684	4.36798
ENST00000372797.7_2	CAP1	CAP1-203	chr1:40505905-40538321	+	protein_coding	2.48901	5.61394	8.96248e-05	0.00184052	4.67122	2.1822	3.14952	4.52243	3.0794	23.9238	26.7708	22.896
ENST00000486004.1_1	DCBLD2	DCBLD2-208	chr3:98544178-98614256	-	processed_transcript	2.48666	5.6048	0.000104544	0.00202467	3.31723	0.830563	0.618105	1.10694	0.649733	10.261	9.05828	7.74286
ENST00000610495.1_1	F8A1	F8A1-201	chrX:154114624-154116336	+	protein_coding	2.48474	5.59734	1.37331e-06	0.000138219	4.42287	1.93813	2.90597	2.9681	2.63073	19.9683	19.8355	21.5882
ENST00000315869.7_1	TFE3	TFE3-201	chrX:48886242-48901012	-	protein_coding	2.48098	5.58278	6.5381e-05	0.00151785	5.68565	3.20466	8.82235	8.42296	7.46634	49.0217	43.8437	59.7841
ENST00000620511.1_1	TRIO	TRIO-224	chr5:14465698-14510310	+	protein_coding	2.47577	5.56263	6.04414e-06	0.00033977	2.47577	0	0	0	0	4.42306	4.14002	5.17492
ENST00000474026.5_1	CAPN2	CAPN2-206	chr1:223945326-223963720	+	processed_transcript	2.47456	5.55797	0.00232994	0.0152664	3.77712	1.30256	0.850319	3.03058	1.01239	13.1002	13.2647	11.8111
ENST00000436117.2_1	MET	MET-204	chr7:116339139-116403134	+	protein_coding	2.47129	5.5454	0.03829	0.105115	4.06998	1.59869	4.97058	0	3.65311	15.5792	14.0164	18.0295
ENST00000373422.7_2	PHC2	PHC2-203	chr1:33789227-33820810	-	protein_coding	2.47119	5.545	0.0204969	0.0678974	5.85568	3.3845	15.6748	15.4221	3.15928	57.9955	57.6996	55.0732
ENST00000566934.1_1	SQOR	SQOR-207	chr15:45951279-45966215	+	protein_coding	2.46941	5.53818	0.000158976	0.00263449	2.52692	0.0575048	0	0.127021	0	5.5744	5.38413	3.56114
ENST00000231790.6_1	MLH1	MLH1-201	chr3:37034823-37092409	+	protein_coding	2.46893	5.53633	0.000273147	0.00370941	2.48452	0.0155878	0	0.032945	0	5.35956	3.21669	5.53649
ENST00000299687.9_1	ZNF407	ZNF407-201	chr18:72342976-72777625	+	protein_coding	2.46838	5.53421	0.0122028	0.047208	3.03285	0.564468	0	2.23419	0	7.61305	6.49379	7.49327
ENST00000458142.1_1	FBXL18	FBXL18-204	chr7:5528809-5541550	-	protein_coding	2.46609	5.52545	0.00380592	0.0212459	3.38255	0.916458	0.324384	2.28076	0.547592	10.3012	8.74967	9.29511
ENST00000320816.10_1	DAB2	DAB2-201	chr5:39371780-39425272	-	protein_coding	2.46364	5.51605	0.00197579	0.013634	3.08101	0.617377	0.189145	1.36367	0.284472	8.84548	7.67399	6.09537
ENST00000422032.1_1	EHBP1	EHBP1-206	chr2:63182750-63221111	+	protein_coding	2.4634	5.51513	0.0453772	0.118249	3.82577	1.36237	0	6.68491	1.2116	12.935	14.1786	12.4796
ENST00000613646.1_1	AL021578.1	AL021578.1-201	chr20:43973755-43974463	-	sense_intronic	2.46253	5.51181	1.43241e-05	0.000579893	3.38095	0.918426	0.969328	0.774221	0.932395	10.6318	8.50061	9.23074
ENST00000539778.6_1	CMIP	CMIP-203	chr16:81528954-81745173	+	protein_coding	2.46239	5.51131	0.018953	0.0643814	2.52668	0.0642842	0.034503	0.043215	0.059129	9.03544	7.0314	1.37406
ENST00000361226.7_1	RUSC2	RUSC2-201	chr9:35490124-35561889	+	protein_coding	2.46191	5.50947	0.000869076	0.00786016	4.30179	1.83988	1.54377	3.69633	2.84006	20.7702	16.5509	19.0791
ENST00000335574.9_2	HM13	HM13-201	chr20:30102231-30157370	+	protein_coding	2.46015	5.50274	0.0340966	0.0968147	3.62641	1.16626	1.81903	1.12363	0.888229	3.33631	18.0417	21.8112
ENST00000381903.2_1	KLRC3	KLRC3-201	chr12:10568183-10573149	-	protein_coding	2.45925	5.4993	2.03222e-05	0.000717163	2.54452	0.0852684	0	0	0.194002	4.91437	4.37942	5.24141
ENST00000333151.4_1	HIST1H2AJ	HIST1H2AJ-201	chr6:27782132-27782518	-	protein_coding	2.45709	5.49108	8.49223e-06	0.000427927	8.33522	5.87813	61.3732	52.6416	59.8109	332.243	299.624	335.255
ENST00000435719.5_3	CAP1	CAP1-214	chr1:40506437-40533372	+	protein_coding	2.45694	5.4905	2.39089e-06	0.000193582	3.61264	1.1557	1.2458	1.20908	1.22904	12.2583	11.0338	10.4721
ENST00000312561.8_2	KIAA1551	KIAA1551-201	chr12:32112353-32146041	+	protein_coding	2.45638	5.48839	0.000107515	0.00206327	4.99119	2.5348	6.12983	4.1883	4.26077	29.947	33.481	29.1503
ENST00000608018.5_1	AC116050.1	AC116050.1-204	chr2:91824714-91843404	-	processed_transcript	2.44795	5.4564	0.0251852	0.0782881	2.44795	0	0	0	0	2.25762	13.4302	2.45576
ENST00000574872.1_1	PFN1	PFN1-203	chr17:4848962-4850764	-	protein_coding	2.44743	5.45445	0.00442106	0.0235618	8.33635	5.88891	32.007	79.6186	77.1949	328.206	314.828	323.755
ENST00000351554.7_1	CD59	CD59-201	chr11:33730411-33757991	-	protein_coding	2.44661	5.45135	0.000631478	0.00636238	3.16576	0.719144	0.421656	1.2984	0.365313	7.95636	8.80621	7.22871
ENST00000371269.7_1	DHCR24	DHCR24-201	chr1:55315306-55352891	-	protein_coding	2.44634	5.4503	1.5564e-06	0.000149272	6.5308	4.08446	15.2123	16.2364	16.4721	92.6114	86.2431	95.7916
ENST00000485631.1_1	BCL2L13	BCL2L13-210	chr22:18189476-18210436	+	processed_transcript	2.44588	5.4486	4.80369e-05	0.00124869	2.64392	0.198037	0.180747	0.117451	0.144089	4.6422	6.46578	4.79663
ENST00000619432.1_1	AC015912.3	AC015912.3-201	chr17:54991547-54991894	+	lincRNA	2.44527	5.44626	3.01558e-05	0.000915164	3.34381	0.898543	0.784108	0.765642	1.05656	8.24337	8.87335	10.4674
ENST00000393480.3_1	CAV2	CAV2-203	chr7:116139834-116141340	+	protein_coding	2.44495	5.44507	1.12559e-05	0.00050208	3.03316	0.588209	0.565571	0.543368	0.406252	7.48831	6.37319	7.76476
ENST00000444664.5_3	SHC1	SHC1-209	chr1:154936153-154938966	-	protein_coding	2.4444	5.44301	4.82466e-05	0.00125156	3.36441	0.92001	0.837282	0.656679	1.22555	9.82788	8.86069	9.231
ENST00000465443.5_1	PLK3	PLK3-204	chr1:45266060-45271662	+	processed_transcript	2.44357	5.43987	0.00193798	0.0134623	2.89262	0.449049	0.373441	0.852344	0	4.47865	7.57313	7.71934
ENST00000592601.5_1	NEDD4L	NEDD4L-235	chr18:55981787-55996359	+	processed_transcript	2.44341	5.43927	0.000662952	0.00658682	2.62096	0.177542	0.236779	0.123409	0.041134	3.60487	5.1018	7.28484
ENST00000337907.7_3	RERE	RERE-201	chr1:8412457-8877524	-	protein_coding	2.44223	5.43483	0.00270868	0.0168532	2.78254	0.340303	0.183863	0.385899	0.236776	7.57983	8.11534	3.16514
ENST00000435011.6_3	ADGRG6	ADGRG6-206	chr6:142623763-142689027	+	protein_coding	2.43993	5.42615	0.000187801	0.00292685	2.48759	0.0476611	0.10207	0	0.00192	6.09876	3.67292	4.31799
ENST00000417122.6_3	ITGB1	ITGB1-204	chr10:33218857-33247155	-	protein_coding	2.43641	5.41292	7.78742e-05	0.00168634	3.47838	1.04197	0.831653	0.97095	1.41812	8.90317	10.8092	10.8385
ENST00000451882.2_1	HSBP1L1	HSBP1L1-201	chr18:77724561-77730822	+	protein_coding	2.43592	5.41108	0.00032307	0.00412672	3.42846	0.992545	1.00922	0.677217	1.33744	12.388	8.34086	8.97943
ENST00000491277.1_1	PTPN14	PTPN14-204	chr1:214701619-214724945	-	processed_transcript	2.43286	5.39964	3.03923e-05	0.000919401	3.36193	0.929071	0.966935	1.03312	0.72616	10.6353	8.85331	8.47914
ENST00000491381.5_2	SNX21	SNX21-212	chr20:44462491-44470369	+	protein_coding	2.43156	5.39478	0.00756396	0.0339264	3.3722	0.940638	0	1.51556	1.8109	11.1484	8.17154	8.96419
ENST00000269389.7_1	SECTM1	SECTM1-201	chr17:80278900-80291874	-	protein_coding	2.43135	5.39398	6.54848e-05	0.00151846	2.97741	0.546061	0.338668	0.549019	0.50111	8.33347	6.0171	6.45883
ENST00000282605.8_2	JADE2	JADE2-201	chr5:133861347-133915164	+	protein_coding	2.42943	5.38679	0.000475135	0.00533	2.7374	0.307979	0.088671	0.118093	0.558683	4.32408	6.47302	6.45386
ENST00000378300.9_1	TPM2	TPM2-204	chr9:35681989-35689900	-	protein_coding	2.42935	5.38652	0.000894569	0.0080119	3.10262	0.673268	1.13444	0.644502	0.15532	6.91654	7.1658	8.80418
ENST00000368172.1_1	KIRREL1	KIRREL1-203	chr1:158056470-158070052	+	protein_coding	2.42875	5.38427	3.09704e-05	0.000931195	3.7275	1.29875	1.24217	1.4425	1.71883	13.1838	10.7999	12.8865
ENST00000248437.8_1	TUBA4A	TUBA4A-201	chr2:220114433-220118754	-	protein_coding	2.42804	5.38162	1.00524e-05	0.00047097	4.19983	1.77179	2.65008	2.28883	2.31701	16.4476	16.4912	19.3363
ENST00000425208.6_1	HMGA2	HMGA2-205	chr12:66218240-66275906	+	protein_coding	2.42707	5.37802	0.00593713	0.0287416	2.74255	0.315476	0	0.706681	0.129148	8.07499	2.90172	7.46579
ENST00000348403.9_1	STRBP	STRBP-201	chr9:125886988-126030843	-	protein_coding	2.42515	5.37086	0.000540747	0.00576817	3.53405	1.10889	0.721332	1.83226	1.05794	9.69011	9.68514	12.6082
ENST00000003583.12_1	STPG1	STPG1-201	chr1:24683495-24740215	-	protein_coding	2.42292	5.36257	5.64288e-05	0.00137094	2.42292	0	0	0	0	4.34312	3.56936	5.31638
ENST00000310045.7_1	DSEL	DSEL-201	chr18:65173819-65184217	-	protein_coding	2.41948	5.3498	9.53546e-07	0.000111101	2.70076	0.281279	0.16641	0.252886	0.228166	5.23426	5.81538	5.46781
ENST00000464515.1_1	INHBA	INHBA-204	chr7:41729114-41732162	-	processed_transcript	2.41629	5.33795	1.79618e-05	0.000667997	2.68348	0.267194	0.328713	0.080067	0.214559	5.71708	4.9846	5.59491
ENST00000506171.1_1	DLC1	DLC1-205	chr8:13071776-13133819	-	processed_transcript	2.41298	5.32574	2.54925e-05	0.000822982	2.69932	0.286339	0.377605	0.084806	0.213704	5.66847	5.0909	5.74561
ENST00000548657.5_1	KRT7	KRT7-206	chr12:52639223-52645970	+	processed_transcript	2.41099	5.31839	7.18975e-05	0.00160258	2.41099	0	0	0	0	3.73262	5.47419	3.90969
ENST00000371998.7_1	NCOA3	NCOA3-202	chr20:46130671-46282363	+	protein_coding	2.40641	5.30154	0.039054	0.106518	4.26214	1.85573	1.72258	1.45397	6.09644	13.8481	9.59517	43.9075
ENST00000531110.5_1	CD44	CD44-231	chr11:35208390-35231608	+	protein_coding	2.40583	5.29939	0.00612365	0.0293396	2.40583	0	0	0	0	4.8101	7.68523	1.94925
ENST00000512772.5_3	FAT1	FAT1-211	chr4:187509546-187517995	-	protein_coding	2.40543	5.29795	0.0111659	0.0444331	2.71283	0.307394	0	0	0.894978	2.58973	6.97376	8.84473
ENST00000367350.4_1	KIF14	KIF14-201	chr1:200520628-200589862	-	protein_coding	2.40344	5.29063	0.0221534	0.0716407	3.6306	1.22716	1.61971	1.31468	1.11588	17.2269	19.8282	4.00487
ENST00000378634.6_2	COPRS	COPRS-202	chr17:30178890-30186093	-	protein_coding	2.4034	5.29048	0.000922459	0.0081714	2.8824	0.479004	0.317234	0.087686	0.889807	7.88191	5.3598	6.09772
ENST00000372745.1_1	AP3M1	AP3M1-202	chr10:75882722-75910600	-	protein_coding	2.40277	5.28817	2.355e-06	0.000191924	4.6164	2.21363	3.6019	3.48705	3.83293	25.2403	23.1863	22.2535
ENST00000366139.3_1	FEZ1	FEZ1-202	chr11:125358823-125366173	-	protein_coding	2.40221	5.28612	0.000228612	0.00332473	3.89577	1.49356	1.31262	2.47843	1.77544	15.0121	14.5667	12.2308
ENST00000395564.8_1	UPP1	UPP1-203	chr7:48128834-48148016	+	protein_coding	2.40168	5.28416	0.00762969	0.034142	3.28375	0.882072	2.15866	0.794891	0.104203	11.3569	6.59384	8.84345
ENST00000417775.5_1	CRYZ	CRYZ-205	chr1:75171174-75199092	-	protein_coding	2.39849	5.27252	0.0288793	0.0862126	4.29833	1.89984	4.74144	0.400019	5.46499	16.7793	22.0865	17.5569
ENST00000557937.5_1	ANXA2	ANXA2-208	chr15:60654826-60690185	-	processed_transcript	2.39678	5.26625	0.000323484	0.00412824	2.93603	0.53925	0.300422	0.250173	0.887716	7.42706	6.74706	5.86567
ENST00000319264.3_1	LURAP1L	LURAP1L-201	chr9:12775020-12822130	+	protein_coding	2.39654	5.2654	1.52351e-05	0.000603195	3.27211	0.875568	0.937087	0.656525	0.92473	8.81153	9.30572	7.91651
ENST00000437340.5_3	CPNE1	CPNE1-216	chr20:34214174-34252878	-	protein_coding	2.396	5.26343	0.00257633	0.0163191	3.45546	1.05945	0.763834	0.999417	1.56697	12.3067	13.0761	6.04753
ENST00000574306.1_1	MIR22HG	MIR22HG-208	chr17:1614805-1619545	-	lincRNA	2.3953	5.26088	0.00275402	0.0170346	3.07566	0.680357	1.30524	0.269219	0.406601	10.0088	7.90845	5.11025
ENST00000556532.1_1	PLEK2	PLEK2-205	chr14:67853704-67859422	-	protein_coding	2.39337	5.25385	4.26294e-05	0.00114861	2.39337	0	0	0	0	3.4279	4.63051	4.81684
ENST00000396210.7_1	MGST1	MGST1-205	chr12:16500583-16517337	+	protein_coding	2.39287	5.25199	0.00407626	0.0222654	3.93775	1.54488	1.83404	3.74474	0.84735	13.6558	16.3904	13.1196
ENST00000428774.1_1	CRIM1	CRIM1-204	chr2:36583614-36606046	+	protein_coding	2.39179	5.24808	0.000382673	0.00459992	2.5828	0.191015	0	0.487659	0	4.19981	5.41012	5.45135
ENST00000576083.5_1	WSCD1	WSCD1-211	chr17:5973744-5991424	+	protein_coding	2.39155	5.24721	0.000242063	0.00343453	4.02264	1.63109	1.44338	2.53609	2.43955	17.2565	13.8653	14.8201
ENST00000326857.9_1	DCBLD2	DCBLD2-202	chr3:98516627-98620170	-	protein_coding	2.39152	5.24708	0.0049032	0.0252475	3.1671	0.775588	0.055647	1.69415	0.763948	8.97826	6.12939	9.1876
ENST00000508342.5_1	NEDD4	NEDD4-208	chr15:56119120-56209329	-	protein_coding	2.39102	5.24527	0.0105863	0.0428225	3.0704	0.679381	1.90775	0.225362	0.15271	11.3964	4.99451	6.9762
ENST00000331944.10_1	CYTOR	CYTOR-201	chr2:87754948-87821037	+	lincRNA	2.38973	5.24058	0.000168226	0.00272839	5.08294	2.69322	6.15001	6.26218	4.21005	33.9877	29.4228	35.5796
ENST00000487713.1_1	SAT1	SAT1-208	chrX:23801625-23802146	+	processed_transcript	2.38859	5.23647	0.000563334	0.00592113	3.69436	1.30576	1.81571	1.80254	0.914615	14.0512	12.6408	9.56638
ENST00000379389.4_3	ISG15	ISG15-201	chr1:948803-949920	+	protein_coding	2.3875	5.23249	9.83975e-06	0.000464011	3.90015	1.51265	1.59958	1.90389	2.07736	13.714	13.2301	14.8946
ENST00000258412.7_1	TMBIM1	TMBIM1-201	chr2:219138915-219157300	-	protein_coding	2.38606	5.22728	0.0162653	0.0578295	3.07113	0.685072	0.31391	0.788021	0.769063	4.07456	17.6007	5.289
ENST00000568865.2_1	CNN2	CNN2-209	chr19:1031136-1038308	+	protein_coding	2.38565	5.2258	0.00468906	0.0245132	2.80261	0.416952	0	1.37983	0	6.24683	5.62816	6.07072
ENST00000353706.6_1	SERPINB8	SERPINB8-202	chr18:61637263-61656605	+	protein_coding	2.3835	5.21801	0.00241521	0.0156322	2.3835	0	0	0	0	7.44281	3.30517	2.90875
ENST00000518206.5_1	NRG1	NRG1-207	chr8:32463166-32600742	+	protein_coding	2.38342	5.21774	0.000385809	0.00462234	2.38342	0	0	0	0	4.03911	5.87195	3.10216
ENST00000243347.4_1	TNFAIP6	TNFAIP6-201	chr2:152214106-152236562	+	protein_coding	2.3829	5.21583	2.59167e-07	5.30898e-05	2.40924	0.0263426	0	0.056306	0	4.42056	4.36395	4.15502
ENST00000171111.9_2	KEAP1	KEAP1-201	chr19:10596796-10614417	-	protein_coding	2.38067	5.20778	0.000209342	0.003143	2.72402	0.343354	0.037563	0.59748	0.232053	5.33494	5.92708	5.57273
ENST00000550488.5_1	FMNL3	FMNL3-205	chr12:50038714-50101003	-	protein_coding	2.37999	5.20533	6.68699e-05	0.00153968	3.21324	0.833253	1.13134	0.552106	0.709735	8.48211	8.43117	7.92025
ENST00000374700.6_1	AOX1	AOX1-202	chr2:201450591-201536218	+	protein_coding	2.37977	5.20453	1.94817e-07	4.51192e-05	2.44314	0.0633713	0.091461	0.018233	0.026537	4.40391	4.45672	4.45423
ENST00000308385.6_1	DUSP6	DUSP6-202	chr12:89742146-89746182	-	protein_coding	2.37887	5.20131	0.0247474	0.0773223	2.37887	0	0	0	0	11.7036	1.57775	3.29704
ENST00000270221.10_1	EMP3	EMP3-201	chr19:48828582-48833810	+	protein_coding	2.37736	5.19586	0.00105066	0.00891422	4.71604	2.33868	3.36923	2.9949	6.41521	24.3343	25.6624	25.8782
ENST00000375784.7_1	CLIC1	CLIC1-208	chr6:31698358-31704344	-	protein_coding	2.37563	5.18963	0.000549293	0.00582444	7.65869	5.28306	43.0682	46.4725	27.2171	198.44	209.28	195.734
ENST00000539589.5_3	PACSIN3	PACSIN3-211	chr11:47199091-47207432	-	protein_coding	2.37481	5.18668	0.0155056	0.0559744	2.48751	0.1127	0.07672	0.090054	0.07703	3.42384	2.21904	11.3857
ENST00000343769.5_1	ZNF93	ZNF93-201	chr19:20011870-20046384	+	protein_coding	2.37433	5.18496	4.51606e-07	7.21279e-05	2.39761	0.0232753	0	0	0.04959	4.43308	4.33311	4.04929
ENST00000170630.6_1	IL4R	IL4R-201	chr16:27352610-27376098	+	protein_coding	2.37402	5.18384	0.0139536	0.0519265	2.8683	0.494282	0.296904	1.15513	0	2.82681	9.07229	9.10114
ENST00000597279.5_1	EMP3	EMP3-206	chr19:48828838-48833810	+	protein_coding	2.37253	5.17847	4.30073e-05	0.00115747	2.6047	0.232173	0.047271	0.194018	0.295995	5.50543	4.41035	5.39406
ENST00000392351.7_1	HOMER3	HOMER3-202	chr19:19040012-19052023	-	protein_coding	2.37058	5.17149	0.00120697	0.00979399	3.74726	1.37668	1.70131	1.53476	1.55715	9.55128	10.5046	18.9498
ENST00000502001.2_1	MIR4458HG	MIR4458HG-201	chr5:8457606-8460776	+	lincRNA	2.36876	5.16496	0.0175344	0.0609369	3.39967	1.03091	0.31791	0.394465	3.64209	11.4875	9.37785	8.07034
ENST00000522721.1_1	SORBS3	SORBS3-215	chr8:22423514-22424691	+	protein_coding	2.36576	5.15423	0.000141986	0.00245606	2.40754	0.0417878	0.001921	0.001775	0.086762	5.12517	4.73166	3.25432
ENST00000591451.5_2	GLYR1	GLYR1-212	chr16:4855050-4897266	-	protein_coding	2.36423	5.14879	0.0156798	0.0564148	3.79134	1.42711	2.37532	1.12373	1.71267	6.62545	11.286	27.3301
ENST00000510156.5_1	CAST	CAST-230	chr5:96038506-96103186	+	protein_coding	2.36121	5.13803	0.000841307	0.00770048	2.65733	0.29612	0.054951	0.663762	0.054628	4.73053	6.70053	4.68978
ENST00000584539.1_1	MYL12B	MYL12B-204	chr18:3262954-3278282	+	protein_coding	2.35982	5.13305	0.000655934	0.00654	2.58742	0.227606	0.605272	0	0	5.36561	5.44784	4.28957
ENST00000354258.4_1	TAP1	TAP1-201	chr6:32812986-32821755	-	protein_coding	2.3588	5.12945	5.50058e-06	0.000324203	4.35133	1.99253	2.85431	3.34449	2.7631	20.4236	18.827	19.0214
ENST00000619297.1_1	LHX1	LHX1-203	chr17:35294084-35295143	+	processed_transcript	2.35647	5.12117	0.000489095	0.00542463	2.56636	0.209887	0.547202	0	0	4.35902	5.60616	4.86976
ENST00000217652.7_1	MYL12A	MYL12A-201	chr18:3247528-3256234	+	protein_coding	2.35584	5.11891	5.0076e-05	0.00127925	6.78335	4.42751	22.4722	19.1001	20.1197	100.142	102.217	127.024
ENST00000265686.7_1	TCIRG1	TCIRG1-201	chr11:67806483-67818362	+	protein_coding	2.35545	5.11753	0.000203676	0.00307941	2.94845	0.593006	0.666328	0.176151	0.751112	6.9158	6.62176	6.62373
ENST00000523681.1_1	NRG1	NRG1-219	chr8:32606342-32608673	+	processed_transcript	2.35493	5.11571	5.92291e-05	0.00141834	2.35493	0	0	0	0	4.13339	4.98869	3.35492
ENST00000368811.7_1	S100A10	S100A10-202	chr1:151955391-151966866	-	protein_coding	2.35037	5.09954	2.12816e-05	0.000738335	7.70037	5.35	37.6443	38.1901	43.7992	188.958	227.252	206.517
ENST00000429538.7_1	PAX8	PAX8-205	chr2:113973574-114036527	-	protein_coding	2.35	5.09825	0.0162427	0.0577799	2.35	0	0	0	0	1.2635	6.12451	7.21727
ENST00000519192.1_1	SLC25A37	SLC25A37-205	chr8:23386488-23389438	+	processed_transcript	2.34876	5.09386	0.00319597	0.0188164	3.26132	0.912563	0.226322	0.900491	1.86191	7.49667	10.1472	8.30792
ENST00000313093.6_1	ARHGAP45	ARHGAP45-201	chr19:1067165-1086627	+	protein_coding	2.34868	5.09359	0.000180639	0.00284822	2.93148	0.582798	0.697208	0.448891	0.366306	5.97223	5.79643	8.36995
ENST00000258145.7_1	GNS	GNS-201	chr12:65107229-65153227	-	protein_coding	2.34824	5.09203	0.0164871	0.0583889	5.64056	3.29232	14.2994	13.2145	3.32371	49.6028	48.8933	48.1719
ENST00000301455.6_1	ANGPTL4	ANGPTL4-201	chr19:8429035-8439257	+	protein_coding	2.34598	5.08404	0.0109042	0.043719	2.34598	0	0	0	0	9.48235	2.44392	2.64012
ENST00000503689.1_1	EREG	EREG-202	chr4:75248140-75250669	+	processed_transcript	2.34526	5.08153	3.42391e-08	1.69808e-05	2.34526	0	0	0	0	3.94331	4.12457	4.17974
ENST00000333467.3_2	APOBEC3B	APOBEC3B-201	chr22:39378414-39388789	+	protein_coding	2.34245	5.07162	0.0364959	0.101539	4.3705	2.02806	2.65619	3.24943	3.36673	10.5363	57.6273	12.0855
ENST00000538643.5_1	MED25	MED25-202	chr19:50321599-50340219	+	protein_coding	2.34176	5.06922	0.000832727	0.00764423	2.34176	0	0	0	0	2.61926	4.38234	5.68702
ENST00000300134.7_1	STAT6	STAT6-201	chr12:57489191-57505216	-	protein_coding	2.33977	5.06223	0.000461995	0.0052403	3.91656	1.57679	1.28351	2.58962	2.23842	15.8414	14.4694	12.2177
ENST00000456754.6_1	TIMP1	TIMP1-205	chrX:47441807-47445422	+	protein_coding	2.33883	5.05891	1.96992e-06	0.000173481	3.11317	0.774339	0.663124	0.633476	0.841875	7.54025	7.58611	7.8349
ENST00000240499.7_1	ZNF141	ZNF141-201	chr4:331624-369047	+	protein_coding	2.33791	5.05568	5.80339e-05	0.00139725	2.3551	0.0171974	0.036408	0	0	3.2874	4.75932	4.4238
ENST00000627621.2_2	NFAT5	NFAT5-212	chr16:69600111-69731385	+	protein_coding	2.33714	5.05299	0.00490532	0.0252563	4.43411	2.09697	5.77568	3.57618	1.52519	21.6593	20.0368	20.192
ENST00000251546.8_1	FBXO44	FBXO44-201	chr1:11714432-11722346	+	protein_coding	2.33672	5.05153	0.0455708	0.118586	3.14966	0.812934	4.42192	0	0	8.28862	7.22223	8.15128
ENST00000217289.8_1	FERMT1	FERMT1-201	chr20:6055492-6104191	-	protein_coding	2.33526	5.04642	2.28576e-05	0.000770359	2.81138	0.476126	0.350108	0.261147	0.580702	6.29388	6.09849	5.6805
ENST00000488001.5_1	DNAJB6	DNAJB6-217	chr7:157129719-157161489	+	processed_transcript	2.33503	5.04561	0.00130618	0.0103289	2.96924	0.634207	0.469389	0.618878	0.571792	7.69965	9.37036	4.32343
ENST00000547408.5_1	MYL6	MYL6-206	chr12:56552152-56556792	+	protein_coding	2.33419	5.04266	0.00155889	0.0116007	2.89565	0.561461	0.233975	1.21303	0.176947	5.99557	6.05185	7.35417
ENST00000487539.1_1	CNN3	CNN3-206	chr1:95363503-95368877	-	processed_transcript	2.33293	5.03829	0.0410548	0.11033	4.78646	2.45353	13.3746	2.51707	2.25074	16.4173	28.2605	40.2425
ENST00000429492.6_1	OSBPL10	OSBPL10-203	chr3:31699404-31871566	-	protein_coding	2.33176	5.03418	8.44968e-07	0.000105111	2.56942	0.237666	0.198955	0.221697	0.119097	4.75434	4.97189	5.08573
ENST00000465518.2_2	RAB42	RAB42-202	chr1:28919007-28920812	+	protein_coding	2.33171	5.03401	4.69764e-05	0.00122833	2.33171	0	0	0	0	4.07836	3.31998	4.81482
ENST00000428777.1_1	KLF7-IT1	KLF7-IT1-201	chr2:207985608-207986768	-	sense_intronic	2.33158	5.03357	0.000582733	0.00604246	3.39275	1.06117	1.45531	0.556049	1.37793	11.0975	8.84913	8.7244
ENST00000587754.1_1	AC090409.1	AC090409.1-201	chr18:59252979-59273890	-	lincRNA	2.33028	5.02902	0.000170256	0.00274712	2.33028	0	0	0	0	5.25016	3.14889	3.90488
ENST00000465804.5_1	WWTR1	WWTR1-203	chr3:149235022-149421060	-	protein_coding	2.32864	5.02331	2.50262e-05	0.000815289	5.03745	2.70881	6.21453	5.65623	4.81922	29.9579	34.2346	31.4736
ENST00000353660.7_1	RBCK1	RBCK1-201	chr20:388815-411610	+	protein_coding	2.32837	5.02238	0.0267348	0.0815973	3.52068	1.1923	2.41623	2.4931	0	16.4236	6.9714	9.88466
ENST00000612899.4_2	TNFAIP3	TNFAIP3-206	chr6:138188325-138204448	+	protein_coding	2.32677	5.01682	3.16903e-06	0.000229045	2.80045	0.47368	0.312755	0.508849	0.351905	5.93714	5.86416	6.10056
ENST00000530636.5_2	EPS8L2	EPS8L2-218	chr11:706629-727051	+	protein_coding	2.32634	5.01533	0.00309292	0.0183936	2.32634	0	0	0	0	2.08525	6.21164	4.66989
ENST00000402676.6_1	AKAP12	AKAP12-204	chr6:151561134-151679692	+	protein_coding	2.32614	5.01463	0.0138593	0.0516778	4.74233	2.41618	9.9395	3.70818	1.95244	25.748	27.6488	24.0235
ENST00000346874.8_1	PARD3	PARD3-202	chr10:34398489-35104249	-	protein_coding	2.32465	5.00946	0.00317131	0.0187317	2.68033	0.355676	1.09512	0	0	5.85279	5.78538	4.66419
ENST00000372710.3_1	DBNDD2	DBNDD2-203	chr20:44036647-44039250	+	protein_coding	2.32209	5.00057	0.0414366	0.111055	3.28168	0.959583	1.10113	0.902448	0.840031	23.6517	8.88417	2.77454

## Sheet: down_ShSETD_vs_Control
Supplementary Table 1. RNA-seq analysis identified a total of 1,501 genes expressed in SETD2-silenced cells, among which 990 genes were up-regulated, and 511 genes were down-regulated (fold change > 5).
#log2FC <= -0.585 #p-value cut-off <= 0.05 #q-value cut-off <= 1.00 #Transcript biotype: processed_transcript,lincRNA,3prime_overlapping_ncrna,antisense,non_coding,sense_intronic,sense_overlapping,TEC,known_ncrna,macro_lncRNA,bidirectional_promoter_lncrna,ncRNA,protein_coding #Condition pair: down_ShSETD_vs_Control Column A: Track_id, The database name in transcript level. Column B: Gene_Name, Th…
Annotation						DE Statistic				FPKM
Track_id	Gene_Name	Trans_Name	Locus	Strand	Trans_Type	log2FC	Fold_Change	p_value	q_value	ShSETD_FPKM	Control_FPKM	control-1	control-2	control-3	shSETD2-1	shSETD2-2	shSETD2-3
ENST00000429829.5_1	XIST	XIST-204	chrX:73040491-73072588	-	lincRNA	-9.722	0.00118409	1.62759e-13	1.22694e-08	0	9.722	845.37	838.952	846.283	0	0	0
ENST00000635841.1_1	XIST	XIST-211	chrX:73046813-73070459	-	lincRNA	-9.19527	0.00170588	1.03428e-11	1.94921e-07	0	9.19527	592.673	585.204	577.842	0	0	0
ENST00000372129.3_1	IRS4	IRS4-201	chrX:107975712-107979639	-	protein_coding	-7.49323	0.00555024	7.23399e-10	2.82371e-06	0.363754	7.85699	235.284	227.568	229.737	0.26618	0.271474	0.323425
ENST00000416330.1_2	XIST	XIST-201	chrX:73040491-73046179	-	lincRNA	-6.85599	0.00863261	3.66272e-08	1.75866e-05	0	6.85599	122.729	106.137	116.263	0	0	0
ENST00000564206.1_1	AL035425.3	AL035425.3-201	chrX:107963179-107968174	-	sense_overlapping	-6.78052	0.00909622	1.88912e-09	4.31543e-06	0.197312	6.97783	124.105	128.438	122.672	0.115182	0.169676	0.155524
ENST00000602495.1_1	XIST	XIST-208	chrX:73048973-73053596	-	lincRNA	-6.65917	0.00989441	8.95558e-11	8.43884e-07	0	6.65917	101.454	98.3448	100.428	0	0	0
ENST00000563887.1_3	AL035425.2	AL035425.2-201	chrX:107965300-107975917	-	protein_coding	-6.11478	0.0144301	6.90408e-09	7.23328e-06	0.0349484	6.14972	69.8219	69.5245	70.6549	0	0.075379	0
ENST00000624509.1_1	AL035425.4	AL035425.4-201	chrX:107969116-107970178	-	TEC	-5.93231	0.0163756	3.23455e-09	5.10157e-06	0.0855482	6.01786	65.9648	63.9143	61.5865	0.061526	0.054865	0.066916
ENST00000337919.9_2	HEY1	HEY1-201	chr8:80676248-80680092	-	protein_coding	-5.5717	0.0210258	1.80738e-07	4.44311e-05	0.10911	5.68081	51.0192	51.3205	48.5958	0.178945	0.064248	0
ENST00000378700.7_2	ID4	ID4-201	chr6:19837617-19840915	+	protein_coding	-5.4135	0.0234624	8.34765e-09	7.58168e-06	0.032895	5.4464	42.7487	42.6548	42.4102	0.070797	0	0
ENST00000417942.5_1	XIST	XIST-202	chrX:73040491-73046136	-	lincRNA	-5.33375	0.0247961	8.84608e-06	0.000438719	0	5.33375	30.172	45.5916	44.1627	0	0	0
ENST00000372695.5_1	BEX4	BEX4-202	chrX:102470020-102472174	+	protein_coding	-5.30886	0.0252274	2.72663e-10	1.66494e-06	0	5.30886	37.9029	39.1398	38.8865	0	0	0
ENST00000331569.5_1	ZNF703	ZNF703-201	chr8:37553269-37557539	+	protein_coding	-5.08312	0.0295005	1.80082e-09	4.31543e-06	1.72519	6.8083	110.629	110.148	112.458	2.26914	2.25652	2.39478
ENST00000233809.8_2	IGFBP2	IGFBP2-201	chr2:217498118-217529159	+	protein_coding	-4.8987	0.0335232	2.83254e-08	1.53618e-05	0.0367597	4.93546	30.3386	29.2871	29.1873	0	0.079437	0
ENST00000600794.1_1	EEF2	EEF2-207	chr19:3976054-3978132	-	protein_coding	-4.87442	0.0340921	0.0456248	0.118693	2.73916	7.61358	17.5535	630.409	640.222	5.96677	5.35996	5.71767
ENST00000324229.10_1	CALCB	CALCB-201	chr11:15095108-15100178	+	protein_coding	-4.81494	0.0355271	1.81833e-10	1.37073e-06	0	4.81494	27.4376	27.2923	26.718	0	0	0
ENST00000254722.8_1	SERPINF1	SERPINF1-201	chr17:1665253-1680868	+	protein_coding	-4.75752	0.0369694	6.09365e-07	8.42869e-05	0	4.75752	28.3987	23.1401	26.8873	0	0	0
ENST00000409419.5_1	PLD3	PLD3-205	chr19:40854585-40884382	+	protein_coding	-4.74703	0.0372392	4.93655e-06	0.000304033	0	4.74703	31.3642	24.9336	22.0713	0	0	0
ENST00000377208.6_1	POU4F1	POU4F1-201	chr13:79172497-79177695	-	protein_coding	-4.74099	0.0373956	4.08159e-10	2.05124e-06	0.0180273	4.75901	26.1011	26.3615	25.7726	0	0.024627	0.013245
ENST00000396290.1_1	ID2	ID2-203	chr2:8822113-8824581	+	protein_coding	-4.70297	0.0383941	9.93944e-05	0.00196687	1.06987	5.77284	35.7994	69.5302	61.9762	1.2829	1.16759	0.86948
ENST00000605337.5_2	MRPL37	MRPL37-206	chr1:54665869-54691137	+	protein_coding	-4.69859	0.0385108	0.0129472	0.0491843	1.22526	5.92386	71.3857	36.1656	82.1728	8.87189	0.207067	0.072481
ENST00000244766.6_1	NRN1	NRN1-201	chr6:5998232-6007200	-	protein_coding	-4.6973	0.0385452	3.48407e-05	0.00100608	0	4.6973	17.9175	27.9163	30.9214	0	0	0
ENST00000392539.3_1	HOXD13	HOXD13-201	chr2:176957619-176960666	+	protein_coding	-4.69143	0.0387025	5.31388e-11	5.7226e-07	0	4.69143	24.7087	25.1291	24.679	0	0	0
ENST00000434839.2_3	XIST	XIST-206	chrX:73040486-73070926	-	lincRNA	-4.67535	0.0391364	1.74956e-08	1.14966e-05	0.00946741	4.68481	24.4896	23.8506	25.8601	0	0.019882	0
ENST00000409028.8_1	RPL31	RPL31-203	chr2:101618745-101636190	+	protein_coding	-4.66992	0.0392837	1.4868e-05	0.000594959	0.584275	5.2542	42.8489	34.006	35.2171	0.857173	0.313654	0.3814
ENST00000345080.4_3	LIN28B	LIN28B-201	chr6:105404923-105531207	+	protein_coding	-4.604	0.0411205	1.51779e-08	1.05396e-05	0	4.604	24.2281	23.4305	22.335	0	0	0
ENST00000437366.2_1	NEFM	NEFM-203	chr8:24771277-24776603	+	protein_coding	-4.5751	0.0419526	0.00129871	0.0102913	0	4.5751	40.8737	28.0081	10.1497	0	0	0
ENST00000348956.6_1	CKB	CKB-201	chr14:103985996-103989448	-	protein_coding	-4.56516	0.0422424	2.08907e-05	0.000727739	0.236072	4.80124	24.9107	22.4196	34.7182	0.269926	0.068407	0.204147
ENST00000614558.2_1	MID1IP1	MID1IP1-204	chrX:38660685-38665781	+	protein_coding	-4.54863	0.0427292	4.09472e-07	6.82913e-05	0	4.54863	24.2791	20.2539	22.8574	0	0	0
ENST00000380874.3_1	FOXC1	FOXC1-201	chr6:1610207-1614132	+	protein_coding	-4.45397	0.0456268	6.69712e-07	9.04459e-05	1.62982	6.08379	64.5615	67.1957	68.7921	1.79014	2.18634	2.33392
ENST00000311177.6_1	HOXB9	HOXB9-201	chr17:46698521-46703718	-	protein_coding	-4.45294	0.0456596	4.18833e-08	1.91735e-05	1.22607	5.67901	51.1709	49.7125	49.8294	1.31707	1.45996	1.24588
ENST00000338662.5_1	ATP5G2	ATP5G2-201	chr12:54058986-54071182	-	protein_coding	-4.42772	0.0464647	0.000440076	0.00505635	0	4.42772	17.6729	13.2441	36.4786	0	0	0
ENST00000320389.11_1	KIF1A	KIF1A-201	chr2:241653181-241759637	-	protein_coding	-4.40271	0.0472772	4.09804e-08	1.90696e-05	0	4.40271	19.026	20.5624	20.9155	0	0	0
ENST00000433732.1_1	XIST	XIST-205	chrX:73047544-73049302	-	lincRNA	-4.30432	0.0506141	5.1673e-07	7.68307e-05	0	4.30432	17.4004	20.8177	18.211	0	0	0
ENST00000373255.8_1	H2AFY2	H2AFY2-201	chr10:71812552-71872036	+	protein_coding	-4.30204	0.050694	3.68686e-06	0.000254437	0.526677	4.82872	27.9291	27.0104	27.3213	0.608087	0.224161	0.518759
ENST00000519108.5_1	HDAC2	HDAC2-206	chr6:114261882-114291888	-	protein_coding	-4.27331	0.0517138	0.0125064	0.048016	0.00279327	4.2761	5.06674	17.3503	64.3288	1e-05	0.00539	0.000423
ENST00000597011.5_1	BCAT2	BCAT2-207	chr19:49298367-49314173	-	protein_coding	-4.2119	0.0539624	1.45673e-07	3.95014e-05	0	4.2119	18.5966	16.3048	17.7663	0	0	0
ENST00000602863.1_2	XIST	XIST-210	chrX:73048923-73061505	-	lincRNA	-4.19608	0.0545574	2.75414e-07	5.52176e-05	0	4.19608	16.442	16.6964	18.9507	0	0	0
ENST00000380780.5_1	MID1	MID1-203	chrX:10413596-10557949	-	protein_coding	-4.19557	0.0545767	9.84575e-06	0.000464011	0	4.19557	19.2875	13.873	19.3868	0	0	0
ENST00000504154.5_2	SLIT2	SLIT2-204	chr4:20255187-20622180	+	protein_coding	-4.17351	0.0554177	2.27033e-07	4.96076e-05	0.0238067	4.19732	16.3545	18.8159	16.9527	0.003328	0.026299	0.020429
ENST00000503823.5_2	SLIT2	SLIT2-202	chr4:20254883-20620743	+	protein_coding	-4.15814	0.0560114	3.91109e-05	0.00108956	0.963798	5.12193	35.3287	32.4544	33.7428	1.37162	1.12578	0.471743
ENST00000268042.6_1	ARRDC4	ARRDC4-201	chr15:98503928-98517068	+	protein_coding	-4.14488	0.0565285	9.73627e-08	3.0799e-05	0.714051	4.85893	28.787	27.4416	27.8449	0.738555	0.580952	0.605999
ENST00000558815.5_1	RPL28	RPL28-207	chr19:55897300-55903171	+	protein_coding	-4.14236	0.0566271	0.00270323	0.0168302	1.32625	5.46861	45.5338	46.7302	38.0916	4.90679	0.713829	0.557402
ENST00000372524.4_1	ZNF503	ZNF503-201	chr10:77157588-77161664	-	protein_coding	-4.07064	0.0595136	1.11352e-06	0.000122542	1.29731	5.36795	42.6446	39.714	38.6342	1.2283	1.51725	1.64662
ENST00000313683.14_1	PNMA8A	PNMA8A-201	chr19:46969755-46974820	-	protein_coding	-4.07001	0.0595395	2.64092e-08	1.46537e-05	0	4.07001	15.6588	16.538	15.2166	0	0	0
ENST00000610854.1_1	NEFL	NEFL-201	chr8:24808468-24814624	-	protein_coding	-4.0672	0.0596554	0.00306444	0.0183007	0	4.0672	24.8116	5.94463	25.2777	0	0	0
ENST00000257552.6_1	MSI1	MSI1-201	chr12:120779133-120806983	-	protein_coding	-4.0656	0.0597218	4.86471e-08	2.04872e-05	0	4.0656	16.2883	14.878	16.1022	0	0	0
ENST00000020945.3_2	SNAI2	SNAI2-201	chr8:49830327-49833988	-	protein_coding	-4.04022	0.0607818	2.67681e-09	4.72034e-06	0.0166147	4.05683	15.7417	15.7358	15.4527	0	0	0.035153
ENST00000372383.8_1	TSC22D3	TSC22D3-203	chrX:106956454-107019017	-	protein_coding	-3.99802	0.0625858	0.00471832	0.0246183	0.263686	4.26171	41.1996	7.09174	19.6706	0.025763	0.191187	0.416137
ENST00000358679.3_3	SLAIN1	SLAIN1-204	chr13:78317240-78338362	+	protein_coding	-3.9954	0.0626996	2.39838e-05	0.00079287	0	3.9954	11.9968	18.9605	14.6386	0	0	0
ENST00000413393.5_1	MAPRE2	MAPRE2-202	chr18:32556892-32723430	+	protein_coding	-3.93229	0.0655033	0.00115326	0.00950863	0	3.93229	6.94295	18.909	21.4998	0	0	0
ENST00000310164.2_1	ZCCHC12	ZCCHC12-201	chrX:117957753-117960931	+	protein_coding	-3.91626	0.0662353	6.01067e-07	8.35993e-05	0.0139869	3.93024	15.6099	14.121	13.1064	0.029512	0	0
ENST00000335350.10_1	UNC5B	UNC5B-201	chr10:72972327-73062621	+	protein_coding	-3.91244	0.0664108	3.04008e-08	1.5873e-05	0.0578815	3.97032	13.9917	14.8996	15.1554	0.045395	0.035948	0.041487
ENST00000517562.2_1	C8orf88	C8orf88-201	chr8:91970865-91997485	-	protein_coding	-3.90459	0.0667731	1.27125e-05	0.000540544	0.172249	4.07684	12.7477	17.8133	17.5804	0.105071	0.157979	0.11806
ENST00000372397.6_1	TSC22D3	TSC22D3-206	chrX:106956451-106960365	-	protein_coding	-3.89305	0.0673095	3.02414e-06	0.000222579	1.02897	4.92202	26.6735	29.5066	32.0041	1.2535	0.97947	0.904794
ENST00000619499.4_3	FBN2	FBN2-208	chr5:127593729-127873296	-	protein_coding	-3.85953	0.0688917	1.21827e-06	0.00012918	0	3.85953	14.9899	13.5636	12.1336	0	0	0
ENST00000310389.5_1	ARL10	ARL10-201	chr5:175792471-175808912	+	protein_coding	-3.85829	0.0689507	2.48297e-11	3.1196e-07	0.013053	3.87134	13.6519	13.5468	13.7066	0.006031	0.008174	0.013074
ENST00000381692.6_1	SON	SON-204	chr21:34915358-34949787	+	protein_coding	-3.8457	0.0695553	0.000109734	0.00208653	0	3.8457	16.2721	15.9998	9.12091	0	0	0
ENST00000372677.7_1	BEX2	BEX2-202	chrX:102564274-102565974	-	protein_coding	-3.8302	0.0703065	3.32964e-05	0.000974762	0.584889	4.41509	21.478	15.7326	24.8167	0.559664	0.470648	0.471186
ENST00000305253.8_1	TUB	TUB-202	chr11:8060180-8127659	+	protein_coding	-3.82949	0.0703409	3.24531e-08	1.64191e-05	0	3.82949	13.0393	13.8586	12.7738	0	0	0
ENST00000218230.5_1	PCSK1N	PCSK1N-201	chrX:48689504-48694035	-	protein_coding	-3.82335	0.0706408	2.10634e-06	0.00017963	0.851942	4.6753	23.8996	23.2504	26.6249	0.782567	0.982207	0.664122
ENST00000307522.3_1	CCDC8	CCDC8-201	chr19:46913629-46916841	-	protein_coding	-3.78479	0.0725545	1.15268e-07	3.38496e-05	0	3.78479	13.1765	11.958	13.2528	0	0	0
ENST00000332710.8_1	TBX1	TBX1-202	chr22:19744226-19754857	+	protein_coding	-3.7779	0.0729021	2.50544e-07	5.26273e-05	0	3.7779	11.9875	13.7362	12.4856	0	0	0
ENST00000450363.3_1	SLC6A15	SLC6A15-203	chr12:85274624-85306572	-	protein_coding	-3.76774	0.0734173	6.05332e-08	2.28162e-05	0	3.76774	13.1594	12.7723	11.9584	0	0	0
ENST00000297375.4_1	EN2	EN2-201	chr7:155250824-155257526	+	protein_coding	-3.76553	0.0735297	5.28112e-07	7.79084e-05	0	3.76553	11.9176	13.8752	12.0908	0	0	0
ENST00000417433.6_1	POLR1B	POLR1B-204	chr2:113300042-113333872	+	protein_coding	-3.75974	0.0738255	0.000222765	0.00327348	0.293553	4.05329	15.6547	16.4261	14.767	0.841215	0	0
ENST00000371692.8_1	FAM69B	FAM69B-202	chr9:139607022-139618502	+	protein_coding	-3.74231	0.0747228	7.8763e-05	0.00169836	0.276961	4.01927	18.5949	15.9597	11.8292	0.341053	0	0.326401
ENST00000368221.1_1	CRABP2	CRABP2-202	chr1:156669548-156675539	-	protein_coding	-3.72946	0.0753914	0.000257893	0.00357446	0	3.72946	12.7128	17.8	8.05217	0	0	0
ENST00000451781.1_1	FAM239B	FAM239B-203	chrX:3811333-3823750	-	lincRNA	-3.71273	0.0762707	0.000168032	0.00272583	0.156888	3.86962	17.0661	14.9743	9.82247	0	0.385747	0
ENST00000375992.3_1	NUDT11	NUDT11-201	chrX:51232863-51239448	-	protein_coding	-3.71044	0.0763915	4.74037e-06	0.0002968	0	3.71044	11.8279	14.0874	10.5903	0	0	0
ENST00000560793.6_1	CERS2	CERS2-213	chr1:150937649-150940201	-	protein_coding	-3.69871	0.0770154	0.0226602	0.0728295	2.04706	5.74577	50.3984	53.9121	53.7436	1.72363	15.519	0.568735
ENST00000266085.6_1	TIMP3	TIMP3-201	chr22:33197687-33259030	+	protein_coding	-3.69007	0.0774782	1.06532e-07	3.23824e-05	0	3.69007	11.6757	11.405	12.6739	0	0	0
ENST00000350356.7_1	PRKACA	PRKACA-202	chr19:14202509-14219202	-	processed_transcript	-3.68995	0.0774845	0.000135665	0.00239224	0	3.68995	8.04999	14.1271	14.7019	0	0	0
ENST00000323469.4_1	DIRAS1	DIRAS1-201	chr19:2714565-2721416	-	protein_coding	-3.67725	0.0781696	7.80749e-09	7.23328e-06	0	3.67725	11.6543	11.5475	12.1853	0	0	0
ENST00000259806.1_1	FOXF2	FOXF2-201	chr6:1390069-1395832	+	protein_coding	-3.65326	0.0794805	1.08312e-07	3.26601e-05	0.0246227	3.67788	11.237	11.9032	12.2765	0	0.052535	0
ENST00000536441.6_2	SESN3	SESN3-203	chr11:94898677-94964361	-	protein_coding	-3.62746	0.0809141	2.6672e-09	4.72034e-06	0.124719	3.75218	12.3839	12.7242	12.3196	0.081836	0.083864	0.105342
ENST00000381106.4_1	FAM239B	FAM239B-201	chrX:3823728-3838787	-	lincRNA	-3.62384	0.0811179	0.000190718	0.00295046	0.417408	4.04124	16.4508	15.5435	14.4584	0	0.895754	0.256536
ENST00000377047.8_1	GPC6	GPC6-201	chr13:93879095-95059655	+	protein_coding	-3.61837	0.0814257	1.03946e-08	8.29101e-06	0	3.61837	10.9078	11.3675	11.5777	0	0	0
ENST00000338779.10_1	MTSS1L	MTSS1L-201	chr16:70695107-70719969	-	protein_coding	-3.61032	0.0818812	1.52702e-06	0.00014796	0.398448	4.00877	14.735	14.8912	15.6824	0.466227	0.252881	0.246589
ENST00000299736.4_1	CENPV	CENPV-201	chr17:16245848-16256813	-	protein_coding	-3.61003	0.0818976	9.84847e-06	0.000464011	1.2373	4.84734	26.4002	26.3332	30.8521	1.55411	1.03302	1.52357
ENST00000582401.5_1	TXNIP	TXNIP-204	chr1:145438469-145442635	+	protein_coding	-3.60675	0.0820843	9.05112e-07	0.000108648	0.674834	4.28158	17.0568	19.1717	19.1963	0.53831	0.703028	0.552996
ENST00000393203.2_1	PTGFRN	PTGFRN-201	chr1:117452679-117532980	+	protein_coding	-3.60084	0.0824211	4.53082e-08	1.96944e-05	0.577236	4.17808	17.0759	17.6912	16.5568	0.496069	0.528045	0.452809
ENST00000377861.4_3	PCDH9	PCDH9-201	chr13:67775147-67804577	-	protein_coding	-3.59552	0.0827256	2.78357e-09	4.72034e-06	0	3.59552	11.091	11.3313	10.847	0	0	0
ENST00000264360.6_2	PCDH10	PCDH10-201	chr4:134070470-134115855	+	protein_coding	-3.58278	0.0834592	3.38041e-06	0.000239952	0	3.58278	12.586	10.7777	9.75038	0	0	0
ENST00000295633.7_1	FSTL1	FSTL1-201	chr3:120111140-120170100	-	protein_coding	-3.57004	0.0841997	1.73078e-06	0.000161277	0.514607	4.08465	18.0121	15.0845	14.9723	0.44932	0.416752	0.419967
ENST00000618019.1_1	PCDH10	PCDH10-203	chr4:134070470-134075043	+	protein_coding	-3.56728	0.0843609	6.00551e-07	8.35993e-05	0	3.56728	9.8555	11.411	11.3629	0	0	0
ENST00000290759.8_1	ISL2	ISL2-201	chr15:76629065-76634817	+	protein_coding	-3.55296	0.0852025	6.79279e-07	9.11153e-05	0	3.55296	11.6888	9.84981	10.7436	0	0	0
ENST00000418818.6_1	AC010997.3	AC010997.3-201	chr10:77039484-77161004	-	lincRNA	-3.50925	0.0878237	0.000474928	0.00532847	0.000127902	3.50937	17.1017	8.4023	7.67614	0	0	0.000266
ENST00000356628.3_1	NRARP	NRARP-201	chr9:140194934-140196703	-	protein_coding	-3.5003	0.0883698	1.95295e-06	0.000172592	0.785202	4.28551	19.113	19.9019	16.6415	0.766161	0.774763	0.632818
ENST00000240662.2_1	KCNJ8	KCNJ8-201	chr12:21917889-21927755	-	protein_coding	-3.49898	0.0884506	3.03823e-06	0.000222579	0	3.49898	8.93248	11.0255	11.0986	0	0	0
ENST00000360388.8_2	SLC35F1	SLC35F1-201	chr6:118228689-118638839	+	protein_coding	-3.4947	0.0887134	3.81045e-05	0.00106911	0	3.4947	11.8778	7.83266	11.5922	0	0	0
ENST00000342480.6_1	PODXL2	PODXL2-201	chr3:127348024-127391652	+	protein_coding	-3.49255	0.0888458	1.02983e-05	0.000477835	0.962918	4.45547	19.2765	22.6095	21.0603	1.13281	0.67597	1.07197
ENST00000327111.7_1	NR2F1	NR2F1-201	chr5:92919043-92930321	+	protein_coding	-3.48477	0.0893261	4.58581e-07	7.21705e-05	0.416164	3.90094	14.4838	14.4009	12.9789	0.310392	0.299108	0.395684
ENST00000231121.2_1	HAND1	HAND1-201	chr5:153854532-153857824	-	protein_coding	-3.48011	0.0896151	2.12019e-08	1.28894e-05	0	3.48011	9.76398	10.4533	10.2708	0	0	0
ENST00000622757.1_1	AL133325.3	AL133325.3-201	chr20:21479899-21483572	-	lincRNA	-3.47697	0.0898109	1.24956e-08	9.32641e-06	0	3.47697	10.3458	10.2873	9.77924	0	0	0
ENST00000370620.5_1	ARHGEF6	ARHGEF6-202	chrX:135747706-135849502	-	protein_coding	-3.47149	0.0901525	7.03826e-08	2.47931e-05	0	3.47149	10.4785	9.5641	10.2551	0	0	0
ENST00000006015.3_1	HOXA11	HOXA11-201	chr7:27221134-27224835	-	protein_coding	-3.47064	0.0902055	6.71986e-08	2.40288e-05	0.0145821	3.48522	10.4878	10.4194	9.70504	0	0	0.030787
ENST00000392650.7_1	SDK2	SDK2-201	chr17:71330523-71640228	-	protein_coding	-3.47017	0.0902347	1.10342e-08	8.48779e-06	0	3.47017	9.94466	10.4345	9.87577	0	0	0
ENST00000391411.9_1	C17orf51	C17orf51-201	chr17:21431571-21454943	-	protein_coding	-3.46414	0.0906126	9.74198e-09	8.15989e-06	0	3.46414	9.70869	10.1569	10.25	0	0	0
ENST00000263012.10_1	NOMO3	NOMO3-201	chr16:16326458-16388663	+	protein_coding	-3.45673	0.0910793	9.31411e-05	0.00188543	0	3.45673	12.2229	11.3052	7.13438	0	0	0
ENST00000400282.6_1	MIR17HG	MIR17HG-201	chr13:92000074-92006833	+	lincRNA	-3.4411	0.0920713	2.43494e-05	0.000800504	1.34521	4.78632	27.3283	25.6829	26.7985	1.08807	2.00383	1.61473
ENST00000325089.7_1	SLITRK5	SLITRK5-201	chr13:88324870-88348527	+	protein_coding	-3.42226	0.0932816	2.81625e-08	1.53618e-05	0.0690583	3.49132	10.2564	10.5878	9.90377	0.033831	0.047867	0.065639
ENST00000372548.8_2	CXorf57	CXorf57-202	chrX:105855202-105922672	+	protein_coding	-3.42172	0.0933168	0.00410832	0.0223837	0.619213	4.04093	7.08765	22.7435	22.2251	0.057316	0.849558	0.853241
ENST00000259818.7_1	TUBB2B	TUBB2B-201	chr6:3224495-3227969	-	protein_coding	-3.41815	0.0935477	0.000249528	0.00349829	2.335	5.75315	53.525	55.2284	50.1753	4.46119	2.51294	5.69503
ENST00000557529.1_3	SHMT2	SHMT2-233	chr12:57626244-57628477	+	protein_coding	-3.4119	0.0939544	9.46111e-07	0.00011092	0.421008	3.8329	12.9762	12.3252	14.538	0.324911	0.319045	0.373289
ENST00000368678.8_1	FYN	FYN-204	chr6:111982489-112194633	-	protein_coding	-3.40413	0.0944614	0.0171991	0.0600971	0.867087	4.27122	17.9938	17.7985	19.1631	0	5.06817	0
ENST00000450717.7_1	SMARCA4	SMARCA4-205	chr19:11094828-11172958	+	protein_coding	-3.40333	0.0945136	9.14776e-05	0.00186478	0	3.40333	12.5175	9.82185	7.09691	0	0	0
ENST00000490451.1_1	C19orf81	C19orf81-203	chr19:51161753-51162567	+	processed_transcript	-3.40172	0.0946192	3.49033e-05	0.00100733	0	3.40172	10.3578	7.41831	11.3465	0	0	0
ENST00000612273.1_1	COL6A1	COL6A1-207	chr21:47401683-47424015	+	protein_coding	-3.39255	0.0952229	0.00784246	0.0347681	0.675853	4.0684	18.5893	16.6218	12.6792	3.04407	0	0.00818
ENST00000613650.1_1	REEP2	REEP2-211	chr5:137776705-137782653	+	protein_coding	-3.38996	0.095394	0.000105269	0.00203372	0.200515	3.59047	11.2371	9.7005	12.3486	0.51734	0	0
ENST00000274364.10_1	IQGAP2	IQGAP2-201	chr5:75699074-76003957	+	protein_coding	-3.38923	0.0954424	3.12554e-06	0.000227445	0	3.38923	8.44241	10.7447	9.37178	0	0	0
ENST00000393104.6_1	PDCD4	PDCD4-202	chr10:112631553-112659763	+	protein_coding	-3.38785	0.0955332	0.0123125	0.0475007	0.252511	3.64036	3.44094	20.4321	19.3722	0.018783	0.65357	0.003542
ENST00000512067.5_1	LINC01021	LINC01021-204	chr5:27472399-27486253	+	lincRNA	-3.38705	0.0955862	4.91819e-05	0.00126753	0.436783	3.82384	12.4032	12.2407	15.0012	0.085793	0.5278	0.494998
ENST00000263563.6_1	PALD1	PALD1-201	chr10:72238577-72328205	+	protein_coding	-3.38286	0.0958644	6.72566e-08	2.40288e-05	0	3.38286	9.82254	9.52178	8.96803	0	0	0
ENST00000373644.4_1	TET1	TET1-201	chr10:70320413-70454239	+	protein_coding	-3.37951	0.0960876	2.37138e-07	5.08009e-05	0.450307	3.82981	12.9233	13.5315	13.2107	0.417659	0.399462	0.285686
ENST00000354666.3_1	ELOVL2	ELOVL2-201	chr6:10980992-11044547	-	protein_coding	-3.37804	0.0961853	1.90431e-07	4.51192e-05	0	3.37804	9.01082	9.14785	10.0619	0	0	0
ENST00000349155.6_4	TBX3	TBX3-202	chr12:115108059-115121969	-	protein_coding	-3.36754	0.0968877	6.84429e-07	9.14805e-05	0.144761	3.5123	10.9826	10.7424	9.55885	0.107082	0.07197	0.138597
ENST00000395040.6_1	MATK	MATK-202	chr19:3777971-3786411	-	protein_coding	-3.35684	0.0976091	1.54367e-06	0.000148808	0	3.35684	8.24407	9.98181	9.59233	0	0	0
ENST00000242261.5_1	TWIST1	TWIST1-201	chr7:19155091-19157295	-	protein_coding	-3.34495	0.098417	6.90255e-07	9.1771e-05	0	3.34495	8.4036	9.23697	9.89744	0	0	0
ENST00000381280.4_1	SMOC1	SMOC1-202	chr14:70346143-70499083	+	protein_coding	-3.33745	0.0989298	1.65111e-08	1.11132e-05	0.0168319	3.35428	9.22513	9.50915	8.95366	0	0.015909	0.019403
ENST00000370818.7_1	GPC3	GPC3-201	chrX:132669773-133119922	-	protein_coding	-3.32958	0.0994708	0.00186202	0.0131	0	3.32958	10.2575	15.2688	4.54774	0	0	0
ENST00000395863.7_1	BMP7	BMP7-201	chr20:55743804-55841684	-	protein_coding	-3.32635	0.0996937	7.79133e-07	9.87129e-05	0	3.32635	9.83233	9.00967	8.30796	0	0	0
ENST00000167106.8_2	VASH1	VASH1-201	chr14:77228532-77249358	+	protein_coding	-3.3261	0.0997112	3.78859e-07	6.57282e-05	0.346586	3.67269	11.2506	12.0292	11.9925	0.198821	0.291235	0.328123
ENST00000414002.5_1	SNHG5	SNHG5-202	chr6:86386802-86388451	-	lincRNA	-3.31166	0.100714	0.00023985	0.00341959	2.38799	5.69965	47.9889	57.6911	47.8233	5.59048	2.72022	4.84907
ENST00000402697.5_3	PRAME	PRAME-203	chr22:22890189-22901695	-	protein_coding	-3.298	0.101672	2.06607e-07	4.69122e-05	0	3.298	8.5205	8.5475	9.46757	0	0	0
ENST00000264436.8_1	ADD2	ADD2-201	chr2:70883916-70995309	-	protein_coding	-3.2941	0.101947	1.43994e-07	3.95014e-05	0	3.2941	8.2744	9.17171	9.00443	0	0	0
ENST00000264059.7_1	EFHD1	EFHD1-201	chr2:233497938-233547491	+	protein_coding	-3.28454	0.102625	1.51528e-07	4.07956e-05	0.268775	3.55332	11.2366	10.4909	10.5067	0.159526	0.239327	0.216918
ENST00000373313.2_1	MAFB	MAFB-201	chr20:39314488-39317880	-	protein_coding	-3.28268	0.102758	3.84039e-08	1.82078e-05	0	3.28268	8.88591	8.97448	8.34645	0	0	0
ENST00000300283.10_1	CKMT1B	CKMT1B-201	chr15:43885252-43891604	+	protein_coding	-3.27842	0.103062	0.0021403	0.0144135	0	3.27842	15.8146	8.8728	4.50274	0	0	0
ENST00000222726.3_1	HOXA5	HOXA5-201	chr7:27180671-27183287	-	protein_coding	-3.27567	0.103258	2.581e-06	0.000200791	1.60358	4.87926	29.6069	27.6912	28.0294	2.23894	2.1794	1.72542
ENST00000284110.1_1	HS3ST3A1	HS3ST3A1-201	chr17:13399006-13505244	-	protein_coding	-3.27359	0.103407	1.21181e-06	0.00012918	0	3.27359	8.22843	9.6477	8.20368	0	0	0
ENST00000354179.8_2	NSD1	NSD1-202	chr5:176560080-176727211	+	protein_coding	-3.27269	0.103472	0.0287187	0.0859132	1.02064	4.29333	18.1639	18.909	18.7574	0	0.060717	6.87274
ENST00000396345.1_1	HOXA9	HOXA9-202	chr7:27203140-27205145	-	protein_coding	-3.27216	0.10351	0.000137298	0.00240472	0.197216	3.46937	8.52901	11.4851	10.4213	0	0	0.506967
ENST00000509894.5_1	TTK	TTK-208	chr6:80713604-80752244	+	protein_coding	-3.26849	0.103773	6.97568e-07	9.22407e-05	0.53888	3.80737	12.1387	13.2553	13.651	0.530691	0.414207	0.41663
ENST00000368061.2_1	VANGL2	VANGL2-201	chr1:160370376-160398468	+	protein_coding	-3.265	0.104025	1.46963e-06	0.000144659	0	3.265	9.45695	8.67057	7.78479	0	0	0
ENST00000286827.7_1	TIAM1	TIAM1-201	chr21:32490734-32931290	-	protein_coding	-3.25839	0.104503	0.000311445	0.00403132	0.0575158	3.31591	7.94487	6.61612	13.4962	0.011196	0.068339	0.043272
ENST00000543669.5_1	FHL1	FHL1-218	chrX:135251455-135293508	+	protein_coding	-3.24393	0.105555	0.023371	0.0743622	1.71457	4.9585	26.0456	32.8847	31.7996	10.4679	0.697286	0.816236
ENST00000324559.8_1	ANO5	ANO5-201	chr11:22214722-22304903	+	protein_coding	-3.2438	0.105564	5.60423e-08	2.19823e-05	0	3.2438	8.78742	8.56307	8.082	0	0	0
ENST00000216286.9_2	NID2	NID2-201	chr14:52471521-52535712	-	protein_coding	-3.24358	0.105581	1.06032e-06	0.000118769	0	3.24358	8.21655	7.89587	9.36298	0	0	0
ENST00000421752.1_2	NUP62CL	NUP62CL-202	chrX:106396522-106449663	-	protein_coding	-3.23523	0.106193	5.03204e-05	0.00128284	0	3.23523	6.40416	9.33238	9.9152	0	0	0
ENST00000370963.8_1	GSTA4	GSTA4-203	chr6:52842751-52860176	-	protein_coding	-3.23384	0.106296	8.17689e-05	0.00173652	0.754038	3.98788	19.5387	13.8391	12.1048	0.627658	0.650305	0.785818
ENST00000308249.3_1	PPM1E	PPM1E-201	chr17:56833230-57062537	+	protein_coding	-3.23311	0.10635	4.43061e-08	1.94184e-05	0.00520059	3.23831	8.29119	8.82752	8.2039	0	0	0.010873
ENST00000269391.10_2	RNF157	RNF157-201	chr17:74138534-74236454	-	protein_coding	-3.23221	0.106416	1.3555e-06	0.000137337	0	3.23221	8.46731	9.18678	7.60418	0	0	0
ENST00000456324.5_1	ZNF146	ZNF146-202	chr19:36705504-36729673	+	protein_coding	-3.23101	0.106505	0.0325875	0.0938054	2.00323	5.23424	36.4186	35.8075	37.7231	0.896108	1.10334	15.1558
ENST00000421322.1_1	XIST	XIST-203	chrX:73040488-73046641	-	lincRNA	-3.23066	0.10653	2.1061e-06	0.00017963	0	3.23066	7.42629	9.04431	8.7729	0	0	0
ENST00000508564.1_1	LINC02381	LINC02381-201	chr12:54519882-54526627	+	lincRNA	-3.23039	0.10655	1.2217e-06	0.00012935	0.5165	3.74689	12.0682	12.0617	13.1765	0.325117	0.466202	0.506599
ENST00000592791.1_1	UBA2	UBA2-208	chr19:34949619-34960303	+	protein_coding	-3.22705	0.106797	0.0459025	0.119218	2.22991	5.45696	44.4096	47.1321	37.7742	0.932945	1.40823	21.1763
ENST00000329559.7_2	NDUFB1	NDUFB1-201	chr14:92582467-92588261	-	protein_coding	-3.22689	0.10681	0.0112827	0.0447603	0.606031	3.83292	22.4001	22.7014	4.21768	0.466323	0.499284	0.603936
ENST00000371528.1_1	ZYG11A	ZYG11A-201	chr1:53308408-53360670	+	protein_coding	-3.2266	0.106831	1.60529e-07	4.16589e-05	0	3.2266	8.66955	7.84161	8.59343	0	0	0
ENST00000589998.5_2	ILF3	ILF3-217	chr19:10765037-10795437	+	protein_coding	-3.2241	0.107016	0.0217513	0.0707223	1.9618	5.1859	35.5571	40.5284	30.7698	2.23665	11.0832	0.511489
ENST00000304411.2_1	GPR27	GPR27-201	chr3:71803201-71805647	+	protein_coding	-3.21803	0.107467	3.27779e-09	5.10157e-06	0	3.21803	8.41633	8.10695	8.39541	0	0	0
ENST00000319653.13_1	FMN2	FMN2-201	chr1:240255180-240638489	+	protein_coding	-3.21596	0.107622	8.1534e-07	0.000102269	0.0043397	3.2203	9.14105	7.83475	8.03529	0	0.009065	0
ENST00000482692.1_1	CREB5	CREB5-213	chr7:28448995-28450372	+	processed_transcript	-3.20676	0.10831	1.58613e-06	0.000150971	0.440089	3.64685	11.9299	12.3652	10.3726	0.353153	0.333053	0.384348
ENST00000367572.3_1	PLAGL1	PLAGL1-204	chr6:144261475-144286005	-	protein_coding	-3.20507	0.108437	3.70958e-07	6.5477e-05	0	3.20507	8.00999	8.87961	7.81051	0	0	0
ENST00000251020.8_2	SALL1	SALL1-201	chr16:51169886-51185186	-	protein_coding	-3.19991	0.108826	4.88386e-07	7.43767e-05	0	3.19991	7.54656	8.68736	8.37154	0	0	0
ENST00000542321.6_1	RGMA	RGMA-203	chr15:93586646-93616377	-	protein_coding	-3.19853	0.108929	5.05169e-06	0.000308402	0	3.19853	7.02904	8.71525	8.91851	0	0	0
ENST00000304494.9_2	CDKN2A	CDKN2A-201	chr9:21967752-21975097	-	protein_coding	-3.19523	0.10918	0.00106481	0.00899034	0.423399	3.61863	12.017	8.18047	14.5084	1.02153	0.001358	0.191511
ENST00000379643.9_1	MAP7D2	MAP7D2-201	chrX:20024985-20135035	-	protein_coding	-3.19295	0.109352	5.78972e-06	0.00033317	0.00014569	3.19309	7.0434	8.31436	9.21079	0	0	0.000303
ENST00000239367.6_1	LRP11	LRP11-201	chr6:150139934-150185162	-	protein_coding	-3.18836	0.1097	1.56232e-06	0.000149649	1.42732	4.61568	23.0455	23.7393	23.7716	1.43852	1.83384	1.81512
ENST00000398955.1_1	MGARP	MGARP-201	chr4:140187317-140201492	-	protein_coding	-3.18688	0.109813	1.20717e-07	3.43634e-05	0.0203017	3.20718	8.37501	8.50485	7.84002	0	0.04312	0
ENST00000519597.5_1	ANKRD46	ANKRD46-204	chr8:101533000-101572012	-	protein_coding	-3.18498	0.109957	6.96543e-06	0.000376133	0.103304	3.28829	8.4558	9.1125	8.7513	0.00332	0.235531	0
ENST00000298743.8_1	GAS1	GAS1-201	chr9:89559278-89562104	-	protein_coding	-3.17532	0.110696	3.12534e-08	1.60272e-05	0.112526	3.28785	8.55204	8.75273	8.99997	0.066299	0.110027	0.067601
ENST00000408931.3_1	TBX20	TBX20-201	chr7:35242042-35293758	-	protein_coding	-3.17282	0.110889	5.77528e-06	0.000332757	0	3.17282	8.18005	9.06271	6.93924	0	0	0
ENST00000372851.7_1	RIMS4	RIMS4-201	chr20:43380449-43438979	-	protein_coding	-3.16293	0.111651	5.31691e-07	7.80103e-05	0	3.16293	7.76828	7.50012	8.63992	0	0	0
ENST00000578845.2_2	CDKN2A	CDKN2A-212	chr9:21967995-21971331	-	protein_coding	-3.15799	0.112034	0.0177218	0.0613801	1.04825	4.20623	11.0417	18.4956	25.7906	0.00357	4.57334	0.58124
ENST00000389617.8_2	GXYLT2	GXYLT2-201	chr3:72937224-73026077	+	protein_coding	-3.15651	0.112149	6.00809e-06	0.000338493	0.243622	3.40013	8.20599	10.2169	10.3941	0.167767	0.206928	0.177538
ENST00000434505.5_1	CKMT1A	CKMT1A-204	chr15:43985084-43991420	+	protein_coding	-3.14308	0.113198	0.0095666	0.0399497	0	3.14308	2.49425	14.4936	11.7343	0	0	0
ENST00000481123.1_1	FMC1	FMC1-203	chr7:139025196-139030536	+	processed_transcript	-3.13295	0.113996	0.000872333	0.00787672	0.409426	3.54238	6.27813	14.515	13.0059	0.439939	0.360485	0.195944
ENST00000346177.6_1	FLNC	FLNC-202	chr7:128470480-128499328	+	protein_coding	-3.13164	0.114099	0.000525649	0.00567538	0	3.13164	6.12225	6.03922	12.428	0	0	0
ENST00000361131.4_1	PPP1R14C	PPP1R14C-201	chr6:150464212-150571493	+	protein_coding	-3.12461	0.114656	3.59361e-07	6.52772e-05	0.0554941	3.18011	8.32888	7.57589	8.30708	0.052726	0	0.066107
ENST00000265634.3_1	NPTX2	NPTX2-201	chr7:98246609-98259180	+	protein_coding	-3.12172	0.114886	1.44764e-07	3.95014e-05	0	3.12172	7.77568	8.07851	7.27753	0	0	0
ENST00000313071.6_1	FOXG1	FOXG1-201	chr14:29234594-29239483	+	protein_coding	-3.11947	0.115066	0.000712956	0.00690106	0	3.11947	11.3222	4.63177	8.45866	0	0	0
ENST00000369626.7_1	SLC16A1	SLC16A1-201	chr1:113454469-113498975	-	protein_coding	-3.11795	0.115187	0.0472345	0.121535	2.74133	5.85928	60.8933	50.6259	60.2273	29.6111	2.21591	2.03726
ENST00000265394.9_1	CPVL	CPVL-201	chr7:29034847-29186153	-	protein_coding	-3.11733	0.115237	0.00738606	0.0333825	0	3.11733	2.67342	11.8141	12.8825	0	0	0
ENST00000613795.4_3	CLCN3	CLCN3-211	chr4:170581213-170644338	+	protein_coding	-3.11368	0.115528	0.0199241	0.066591	0.852141	3.96582	15.104	16.3386	12.663	4.6544	0.040334	0
ENST00000445888.6_1	TP53	TP53-205	chr17:7571739-7590805	-	protein_coding	-3.10844	0.115949	0.00313505	0.0185563	0.305734	3.41417	14.3114	12.6337	4.80331	0.634341	0	0.15548
ENST00000222728.3_1	HOXA6	HOXA6-201	chr7:27185015-27187393	-	protein_coding	-3.10364	0.116335	5.53966e-05	0.00135717	0.310338	3.41398	9.35237	12.0816	7.94181	0.265517	0.139857	0.321735
ENST00000470610.6_1	EPHA6	EPHA6-202	chr3:96533425-96963540	+	protein_coding	-3.10016	0.116616	1.16363e-05	0.000511779	0.202584	3.30275	9.59436	9.70923	7.46924	0.184886	0.173867	0.09561
ENST00000619485.4_1	TP53	TP53-225	chr17:7571739-7590805	-	protein_coding	-3.09876	0.116729	0.00184602	0.0130215	0.275414	3.37418	14.95	9.81559	5.46211	0.559784	0	0.136735
ENST00000369774.8_3	SH3PXD2A	SH3PXD2A-203	chr10:105353784-105615301	-	protein_coding	-3.09819	0.116775	0.000147718	0.00251618	0.0114427	3.10964	6.51296	6.31314	10.7049	0.011291	0.012646	0
ENST00000537058.5_2	CADM1	CADM1-206	chr11:115045027-115375133	-	protein_coding	-3.09356	0.117151	0.0188391	0.0641188	0	3.09356	1.77574	14.3634	13.5846	0	0	0
ENST00000476159.1_1	PNISR	PNISR-206	chr6:99849338-99854003	-	processed_transcript	-3.09335	0.117168	7.07052e-05	0.00158585	1.88841	4.98176	36.3802	27.8972	28.2063	2.06799	3.01036	3.12448
ENST00000523976.1_1	HEY1	HEY1-208	chr8:80676955-80678710	-	protein_coding	-3.09239	0.117246	1.23308e-06	0.000129464	0	3.09239	6.80247	8.07622	7.76134	0	0	0
ENST00000285379.9_1	CA2	CA2-201	chr8:86376081-86393722	+	protein_coding	-3.08672	0.117708	6.10921e-06	0.000342661	2.5541	5.64083	51.9515	52.488	42.857	4.74088	5.13223	4.75425
ENST00000503431.5_1	UCHL1	UCHL1-204	chr4:41258786-41270273	+	protein_coding	-3.06914	0.119151	0.0356922	0.0999032	0	3.06914	5.54848	1.96921	29.4038	0	0	0
ENST00000392547.6_1	WIPF1	WIPF1-204	chr2:175424300-175499307	-	protein_coding	-3.06634	0.119382	2.42487e-07	5.17837e-05	0.0570143	3.12336	7.48554	7.49983	8.17452	0.013467	0.06993	0.038303
ENST00000369849.8_1	INA	INA-201	chr10:105036920-105050108	+	protein_coding	-3.06466	0.119522	6.8932e-07	9.1771e-05	0	3.06466	6.98314	8.04274	7.11309	0	0	0
ENST00000357802.6_1	RRP7BP	RRP7BP-201	chr22:42951229-42978044	-	processed_transcript	-3.05933	0.119964	4.98218e-05	0.00127764	0.36796	3.42729	9.75759	10.2722	9.26662	0.171713	0.138749	0.610836
ENST00000376335.7_2	ZIC2	ZIC2-201	chr13:100634026-100639027	+	protein_coding	-3.05576	0.120261	9.65106e-06	0.000460016	1.29988	4.35563	21.2207	19.9818	17.4046	1.51514	1.65591	1.23424
ENST00000413453.6_1	CKMT1A	CKMT1A-202	chr15:43985725-43991420	+	protein_coding	-3.05478	0.120343	0.00423442	0.0228708	0.0717248	3.1265	16.939	4.78256	5.42088	0.051295	0.030315	0.071715
ENST00000264990.10_1	ACAD11	ACAD11-201	chr3:132276988-132379567	-	protein_coding	-3.05196	0.120578	1.51451e-05	0.000601098	1.143	4.19497	18.3129	16.5417	17.1348	1.5368	0.924794	1.20578
ENST00000494517.5_4	GOLGB1	GOLGB1-208	chr3:121414325-121468513	-	protein_coding	-3.05164	0.120605	3.71213e-08	1.77111e-05	0.567182	3.61882	11.2427	11.4116	11.2017	0.523578	0.432527	0.490215
ENST00000398316.7_1	FNDC3A	FNDC3A-202	chr13:49684449-49783729	+	protein_coding	-3.0492	0.120809	0.00761876	0.034116	1.22722	4.27642	18.5967	17.2953	19.2989	2.62184	2.53062	0.003486
ENST00000377236.2_2	SLAIN1	SLAIN1-205	chr13:78273017-78318507	+	protein_coding	-3.04685	0.121006	2.59688e-05	0.000831973	0	3.04685	7.43117	8.66428	5.9267	0	0	0
ENST00000575960.5_1	ARL17B	ARL17B-207	chr17:44407819-44439084	-	protein_coding	-3.04551	0.121119	0.00126358	0.0101011	0	3.04551	5.86556	4.9355	12.8113	0	0	0
ENST00000342232.4_1	JPH1	JPH1-201	chr8:75146935-75233563	-	protein_coding	-3.04523	0.121142	2.54378e-06	0.000199542	0	3.04523	6.4339	7.50752	7.89406	0	0	0
ENST00000261937.10_2	FLT4	FLT4-201	chr5:180028506-180076624	-	protein_coding	-3.04141	0.121463	1.96149e-05	0.000700483	0	3.04141	8.19983	7.8033	5.8904	0	0	0
ENST00000369303.8_1	EPHA7	EPHA7-202	chr6:93949738-94129244	-	protein_coding	-3.03342	0.122137	1.2048e-09	3.36381e-06	0.00423866	3.03766	7.17177	7.13328	7.33107	0	0.008853	0
ENST00000427569.6_1	AARSD1	AARSD1-202	chr17:41102563-41116493	-	protein_coding	-3.0334	0.122139	0.00171296	0.0123616	0.50447	3.53787	11.8504	9.97423	10.1103	1.46547	0.050348	0.102426
ENST00000464387.5_1	ANKRD19P	ANKRD19P-203	chr9:95576189-95600739	+	processed_transcript	-3.03254	0.122213	4.7495e-08	2.01144e-05	0	3.03254	7.48533	7.14633	6.92542	0	0	0
ENST00000367806.7_1	CCDC181	CCDC181-202	chr1:169364108-169396655	-	protein_coding	-3.03238	0.122226	1.86776e-07	4.47302e-05	0	3.03238	7.3446	6.74285	7.47633	0	0	0
ENST00000626650.2_1	ZNF280B	ZNF280B-203	chr22:22838767-22863472	-	protein_coding	-3.03155	0.122296	2.53792e-05	0.000821111	0	3.03155	6.17651	6.73284	8.85159	0	0	0
ENST00000252486.8_1	APOE	APOE-201	chr19:45409011-45412650	+	protein_coding	-3.0237	0.122964	0.00019928	0.00303695	0.0749894	3.09869	5.54525	10.2485	7.5383	0.032218	0.000386	0.131835
ENST00000250111.8_1	ATP1B2	ATP1B2-201	chr17:7554430-7561086	+	protein_coding	-3.01816	0.123436	4.26735e-07	7.00849e-05	0.0186291	3.03679	6.83142	7.0581	7.75831	0.020743	0.018374	0
ENST00000301242.8_1	PPP1R14A	PPP1R14A-201	chr19:38741877-38747231	-	protein_coding	-3.00933	0.124194	9.02347e-05	0.00184844	0	3.00933	8.50037	7.8337	5.22027	0	0	0
ENST00000402744.8_1	CPE	CPE-201	chr4:166300094-166419472	+	protein_coding	-3.00754	0.124349	2.35988e-06	0.000191989	1.55222	4.55976	21.3482	24.0176	22.4632	1.71991	2.12898	1.96374
ENST00000288699.10_1	DPYSL5	DPYSL5-201	chr2:27070969-27173219	+	protein_coding	-3.00198	0.124829	0.00666615	0.0310851	0	3.00198	11.7225	2.59126	10.2522	0	0	0
ENST00000356450.2_2	NUDT10	NUDT10-201	chrX:51075682-51080377	+	protein_coding	-2.99742	0.125224	1.60046e-07	4.16589e-05	0	2.99742	7.17606	7.22441	6.57342	0	0	0
ENST00000396425.7_1	SEPT3	SEPT3-202	chr22:42372938-42394225	+	protein_coding	-2.9928	0.125625	1.17012e-05	0.000513434	0.087989	3.08079	7.83246	6.68546	7.92242	0.200776	0	0
ENST00000369519.3_1	RBM20	RBM20-201	chr10:112404155-112599227	+	protein_coding	-2.98704	0.126128	1.4277e-05	0.000578474	0.0197858	3.00682	7.5704	7.85848	5.84025	0	0.022033	0.019538
ENST00000400677.4_2	HMX1	HMX1-201	chr4:8868774-8873543	-	protein_coding	-2.9808	0.126675	5.55384e-06	0.00032615	0	2.9808	6.0485	6.92911	7.80257	0	0	0
ENST00000304758.5_1	AMOT	AMOT-201	chrX:112017731-112084043	-	protein_coding	-2.97933	0.126803	0.000952357	0.00835282	1.79964	4.77898	23.8982	22.489	34.3846	1.71954	4.16411	2.00434
ENST00000544440.6_1	MYCBP2	MYCBP2-211	chr13:77618790-77900814	-	protein_coding	-2.97685	0.127022	0.00867385	0.0373192	1.74018	4.71703	26.1288	27.0551	22.9033	5.80795	2.52628	0.553123
ENST00000244745.3_2	SOX4	SOX4-201	chr6:21592999-21598850	+	protein_coding	-2.97306	0.127356	2.75088e-08	1.51367e-05	2.85349	5.82655	55.4003	56.0308	55.8204	6.0065	6.26474	6.41714
ENST00000433454.3_1	NEFM	NEFM-202	chr8:24772455-24776611	+	protein_coding	-2.9705	0.127583	0.000383872	0.00460541	0	2.9705	7.19791	4.56008	9.56434	0	0	0
ENST00000602587.5_1	XIST	XIST-209	chrX:73047582-73051232	-	lincRNA	-2.96727	0.127868	9.83176e-07	0.000113674	0	2.96727	7.33831	6.23763	6.92577	0	0	0
ENST00000321612.7_2	GLDC	GLDC-201	chr9:6532464-6645783	-	protein_coding	-2.9634	0.128212	1.08758e-06	0.000120955	0.00200932	2.96541	6.18988	7.01284	7.27034	0	0.004187	0
ENST00000377474.3_1	KCTD12	KCTD12-201	chr13:77454301-77460525	-	protein_coding	-2.96261	0.128282	7.45903e-07	9.57907e-05	2.17322	5.13584	33.8277	34.9842	33.6806	3.19583	3.62113	3.73205
ENST00000375011.3_1	GALNT12	GALNT12-201	chr9:101569981-101612363	+	protein_coding	-2.95884	0.128617	1.11542e-06	0.000122572	0.0746626	3.0335	6.90716	7.80072	6.88839	0.047986	0.015282	0.097703
ENST00000527830.1_1	APIP	APIP-202	chr11:34903917-34937898	-	processed_transcript	-2.95821	0.128674	0.000234704	0.00337651	0.428097	3.38631	8.15415	10.5455	9.8171	0.538819	0	0.582786
ENST00000343483.6_1	HOXA9	HOXA9-201	chr7:27202054-27205149	-	protein_coding	-2.95735	0.12875	2.31366e-05	0.000776064	1.16264	4.12	19.2667	15.1958	15.0155	1.42727	1.04771	1.25728
ENST00000515673.6_1	RNF150	RNF150-206	chr4:141780961-142053996	-	protein_coding	-2.95698	0.128784	3.12612e-07	5.96606e-05	0.0359835	2.99296	6.72214	7.45413	6.72866	0.025159	0.012015	0.038767
ENST00000199708.2_1	HBQ1	HBQ1-201	chr16:230452-231180	+	protein_coding	-2.9507	0.129346	4.48459e-05	0.0011862	0	2.9507	8.4703	5.57047	6.4265	0	0	0
ENST00000567444.5_1	MAZ	MAZ-211	chr16:29818857-29820168	+	protein_coding	-2.94831	0.129559	0.00231849	0.0152219	1.68322	4.63153	30.1482	18.1291	24.5601	1.67163	4.36853	1.30922
ENST00000371959.7_1	AMOT	AMOT-203	chrX:112017731-112066354	-	protein_coding	-2.94393	0.129954	0.000522414	0.0056526	1.94654	4.89047	32.9472	33.7096	21.1451	3.58899	1.94318	3.24001
ENST00000398838.8_3	YPEL3	YPEL3-201	chr16:30103670-30107565	-	protein_coding	-2.94162	0.130162	0.000204019	0.00308336	0	2.94162	9.31281	6.29717	5.02586	0	0	0
ENST00000396276.7_1	CPVL	CPVL-202	chr7:29035247-29186113	-	protein_coding	-2.94004	0.130305	0.00554567	0.0274167	0	2.94004	15.235	4.24857	4.30424	0	0	0
ENST00000317995.4_1	CA8	CA8-201	chr8:61099906-61193971	-	protein_coding	-2.93635	0.130638	2.42295e-06	0.00019535	0	2.93635	7.18157	6.92324	5.91908	0	0	0
ENST00000381020.7_1	CDX2	CDX2-201	chr13:28536274-28545276	-	protein_coding	-2.93408	0.130844	4.69654e-07	7.3301e-05	0	2.93408	7.10466	6.64666	6.20335	0	0	0
ENST00000392825.7_1	GALNT13	GALNT13-201	chr2:154728426-155310361	+	protein_coding	-2.9325	0.130988	4.13422e-06	0.000273861	0.00579393	2.93829	7.61137	6.30588	6.15805	0	0	0.012121
ENST00000234198.8_1	DLX2	DLX2-201	chr2:172964167-172967628	-	protein_coding	-2.9289	0.131314	1.57211e-06	0.000150206	1.08767	4.01658	14.1236	16.0238	15.4672	1.25439	1.06864	1.05849
ENST00000395789.5_1	C6orf48	C6orf48-209	chr6:31802709-31807538	+	protein_coding	-2.92096	0.13204	0.044244	0.11618	1.50465	4.4256	22.132	24.5242	15.8095	9.96339	0.794312	0.16142
ENST00000352511.4_1	ACVR2B	ACVR2B-201	chr3:38495342-38534633	+	protein_coding	-2.91351	0.132723	8.58939e-07	0.000105974	1.64966	4.56317	22.1796	23.8033	21.9793	2.3024	2.15252	1.9669
ENST00000378482.6_1	TSPAN7	TSPAN7-202	chrX:38420623-38548167	+	protein_coding	-2.91049	0.133001	1.73953e-07	4.43887e-05	0.773252	3.68374	11.5625	12.3903	11.6148	0.766036	0.680417	0.682284
ENST00000297323.11_1	ADCY1	ADCY1-201	chr7:45614121-45762715	+	protein_coding	-2.90945	0.133097	3.66002e-07	6.5477e-05	0	2.90945	6.2131	6.99743	6.35223	0	0	0
ENST00000360830.8_1	RPS24	RPS24-201	chr10:79793641-79800455	+	protein_coding	-2.90368	0.133631	0.0255912	0.0791885	6.26682	9.17049	556.601	509.587	671.026	44.0693	241.684	40.7423
ENST00000522362.6_1	PNMA2	PNMA2-204	chr8:26362202-26371608	-	protein_coding	-2.89713	0.134239	3.43943e-07	6.37233e-05	0	2.89713	6.02613	6.53199	6.81161	0	0	0
ENST00000328345.7_2	POU3F2	POU3F2-201	chr6:99282468-99287346	+	protein_coding	-2.89225	0.134694	2.87469e-07	5.68781e-05	0.0799435	2.97219	6.94295	7.05793	6.55004	0.0269	0.103996	0.041599
ENST00000452445.6_2	NELL2	NELL2-205	chr12:44902065-45270138	-	protein_coding	-2.88806	0.135085	2.24243e-05	0.000760839	0.00935453	2.89741	7.07826	7.19684	5.24681	0.007138	0	0.012416
ENST00000503283.5_1	NDUFA13	NDUFA13-203	chr19:19627037-19639863	+	protein_coding	-2.8802	0.135823	0.00947767	0.0396871	0	2.8802	2.63297	14.8816	5.91705	0	0	0
ENST00000372384.6_1	TSC22D3	TSC22D3-204	chrX:106956454-107019218	-	protein_coding	-2.87388	0.136419	0.0498486	0.126193	0	2.87388	10.4374	0.803116	18.0997	0	0	0
ENST00000484999.5_1	ARIH2	ARIH2-223	chr3:48960198-49004708	+	processed_transcript	-2.87277	0.136524	1.85433e-06	0.000168013	0.75557	3.62834	10.8509	11.152	12.1316	0.805545	0.664804	0.600946
ENST00000416000.1_2	GNPAT	GNPAT-202	chr1:231376962-231411014	+	protein_coding	-2.86871	0.136909	0.0158682	0.0568432	0	2.86871	1.87206	14.4739	7.76819	0	0	0
ENST00000394171.6_1	NR2F2	NR2F2-202	chr15:96875794-96883492	+	protein_coding	-2.86437	0.137321	0.0106242	0.0429298	0.28375	3.14812	2.77457	12.0565	13.1366	0.316409	0.370442	0
ENST00000393350.1_1	MAF	MAF-202	chr16:79628228-79634611	-	protein_coding	-2.86345	0.137409	2.75736e-09	4.72034e-06	0.00532854	2.86878	6.20964	6.4202	6.28513	0	0	0.011142
ENST00000355300.6_1	LINGO1	LINGO1-201	chr15:77905369-77924832	-	protein_coding	-2.86038	0.137702	2.06322e-05	0.000723078	0	2.86038	5.13465	6.70133	7.10634	0	0	0
ENST00000341356.9_1	CORO1B	CORO1B-201	chr11:67205547-67210983	-	protein_coding	-2.85635	0.138087	0.000562386	0.00591663	0.87387	3.73022	12.716	11.8326	12.2794	0.68952	0.366606	1.66549
ENST00000612582.1_1	CECR2	CECR2-206	chr22:17956135-18037850	+	protein_coding	-2.85443	0.138271	8.51071e-07	0.000105443	0.0556915	2.91013	6.0005	6.97079	6.61158	0.044959	0.045709	0.027506
ENST00000439118.2_2	ITPRIPL1	ITPRIPL1-204	chr2:96991146-96994064	+	protein_coding	-2.85274	0.138433	7.99808e-05	0.00171481	0	2.85274	4.71633	7.51698	6.74238	0	0	0
ENST00000327835.7_1	ZNF704	ZNF704-201	chr8:81540686-81787016	-	protein_coding	-2.85261	0.138445	4.60519e-08	1.98376e-05	0.0873147	2.93993	6.52272	6.54452	6.96185	0.059574	0.06247	0.065136
ENST00000239243.6_1	MSX2	MSX2-201	chr5:174151536-174157896	+	protein_coding	-2.8448	0.139197	1.91812e-06	0.000171525	0	2.8448	5.79434	6.88633	5.91965	0	0	0
ENST00000371130.7_3	TENM1	TENM1-201	chrX:123509753-124097666	-	protein_coding	-2.84303	0.139368	0.000243556	0.00344721	0	2.84303	7.30841	4.22247	7.51373	0	0	0
ENST00000440886.1_1	LPAR3	LPAR3-202	chr1:85277285-85331842	-	protein_coding	-2.83731	0.139921	2.19351e-07	4.88962e-05	0	2.83731	6.522	6.079	5.85555	0	0	0
ENST00000280481.8_1	FREM2	FREM2-201	chr13:39261266-39461268	+	protein_coding	-2.83363	0.140279	1.36128e-10	1.14021e-06	0	2.83363	6.11125	6.18834	6.08674	0	0	0
ENST00000351718.8_2	NRCAM	NRCAM-201	chr7:107788107-108096783	-	protein_coding	-2.82947	0.140684	2.69167e-07	5.45453e-05	0	2.82947	5.83247	6.51338	5.99598	0	0	0
ENST00000445814.1_1	XIST	XIST-207	chrX:73047636-73051045	-	lincRNA	-2.8277	0.140857	3.19774e-05	0.000949796	0	2.8277	7.56215	5.6093	5.32306	0	0	0
ENST00000284262.2_1	JPH3	JPH3-201	chr16:87636511-87731762	+	protein_coding	-2.82734	0.140892	2.54776e-09	4.72034e-06	0	2.82734	6.11121	5.98304	6.20031	0	0	0
ENST00000218316.3_2	GPR50	GPR50-201	chrX:150345125-150349937	+	protein_coding	-2.8261	0.141013	2.31486e-06	0.000189728	0	2.8261	5.85949	5.65886	6.80789	0	0	0
ENST00000263388.6_1	NOTCH3	NOTCH3-201	chr19:15269849-15311792	-	protein_coding	-2.82522	0.141099	4.20656e-06	0.000276708	0.0795864	2.90481	6.98966	6.84421	5.70231	0.072025	0.063261	0.035211
ENST00000340940.4_1	KLRG2	KLRG2-201	chr7:139137436-139168458	-	protein_coding	-2.82477	0.141143	5.67626e-06	0.000329574	0	2.82477	6.03	5.39908	6.90582	0	0	0
ENST00000617122.1_2	NDUFB1	NDUFB1-207	chr14:92582470-92588153	-	protein_coding	-2.82363	0.141254	0.0491936	0.124993	0.167242	2.99087	3.50907	2.48637	30.9572	0.030845	0.180568	0.163457
ENST00000483404.5_1	TARBP1	TARBP1-207	chr1:234527085-234543701	-	processed_transcript	-2.81999	0.141612	0.000953873	0.00836034	0.35678	3.17677	7.93844	7.61007	8.60817	0.053153	0	0.993946
ENST00000568641.1_1	NLRP1	NLRP1-206	chr17:5402759-5404465	-	processed_transcript	-2.81812	0.141795	0.000133414	0.0023692	0.367313	3.18544	8.21059	7.53436	8.57809	0	0.544381	0.389833
ENST00000367963.7_1	MOXD1	MOXD1-202	chr6:132617194-132722684	-	protein_coding	-2.8168	0.141925	0.000225796	0.00330192	0.617227	3.43402	11.379	11.7295	7.01188	0.517932	0.446006	0.644331
ENST00000366813.1_1	H3F3A	H3F3A-201	chr1:226251678-226259702	+	protein_coding	-2.81536	0.142067	0.0474438	0.121936	0.982751	3.79811	32.1881	21.5767	2.59247	1.29548	0.823835	0.843539
ENST00000332312.3_1	EMILIN3	EMILIN3-201	chr20:39988606-39995467	-	protein_coding	-2.81448	0.142153	9.13892e-07	0.000109008	0	2.81448	6.31408	5.51248	6.3084	0	0	0
ENST00000320578.2_1	RAB39A	RAB39A-201	chr11:107799229-107834208	+	protein_coding	-2.81261	0.142338	1.1527e-08	8.7773e-06	0	2.81261	5.99133	5.88979	6.19904	0	0	0
ENST00000294702.5_1	GFI1	GFI1-201	chr1:92940321-92952433	-	protein_coding	-2.80791	0.142802	3.86396e-07	6.65082e-05	0	2.80791	5.73644	5.84648	6.44559	0	0	0
ENST00000233813.4_1	IGFBP5	IGFBP5-201	chr2:217536828-217560248	-	protein_coding	-2.80711	0.142881	5.80509e-07	8.23876e-05	0	2.80711	6.27884	5.53597	6.20618	0	0	0
ENST00000403491.7_1	NFIA	NFIA-207	chr1:61547980-61928465	+	protein_coding	-2.80504	0.143086	8.72311e-08	2.84848e-05	0.0667286	2.87177	6.38657	6.38365	6.19042	0.009716	0.054754	0.078727
ENST00000432145.5_4	NUP62CL	NUP62CL-203	chrX:106367378-106397464	-	protein_coding	-2.80263	0.143326	1.52243e-05	0.000603161	0	2.80263	6.42586	6.65087	4.97815	0	0	0
ENST00000368648.7_1	EBF3	EBF3-202	chr10:131633547-131762105	-	protein_coding	-2.79419	0.144167	4.22639e-06	0.000277528	0.0063685	2.80056	5.67064	6.78619	5.5112	0	0.013331	0
ENST00000479452.5_1	EXD3	EXD3-208	chr9:140260597-140317607	-	protein_coding	-2.79251	0.144335	0.000572168	0.00597898	0.282657	3.07516	7.4945	7.3555	7.4341	0.794492	0.003052	0
ENST00000393437.7_3	LONRF2	LONRF2-201	chr2:100889753-100939195	-	protein_coding	-2.79225	0.144361	1.29138e-08	9.37277e-06	0.0874417	2.87969	6.27373	6.51847	6.29008	0.048652	0.077108	0.061884
ENST00000267460.8_1	PELI2	PELI2-201	chr14:56585093-56768244	+	protein_coding	-2.78867	0.14472	2.22794e-07	4.9027e-05	0.226328	3.01499	7.37068	7.20492	6.69088	0.152021	0.18471	0.173064
ENST00000389063.2_1	DCP2	DCP2-201	chr5:112312433-112356667	+	protein_coding	-2.78847	0.144739	0.00517684	0.0262058	1.38786	4.17633	8.25614	25.1792	23.3902	1.88764	1.86872	1.16335
ENST00000309558.7_1	SUSD5	SUSD5-201	chr3:33191534-33260707	-	protein_coding	-2.78833	0.144754	3.40978e-08	1.69808e-05	0.0313061	2.81963	5.97286	6.2873	5.92474	0.026294	0.011568	0.028029
ENST00000393693.6_2	SNCB	SNCB-202	chr5:176047242-176057530	-	protein_coding	-2.78806	0.14478	8.95657e-06	0.00044063	0	2.78806	5.27064	6.86915	5.67776	0	0	0
ENST00000361360.3_2	POU3F3	POU3F3-201	chr2:105471969-105475032	+	protein_coding	-2.78639	0.144948	1.35575e-05	0.000559712	0	2.78639	5.50055	7.00855	5.30755	0	0	0
ENST00000563060.6_1	ALDOA	ALDOA-209	chr16:30075595-30081735	+	protein_coding	-2.78544	0.145044	0.0115032	0.0453797	0.648811	3.43425	10.9552	7.33352	11.6781	2.60364	0	0.06953
ENST00000369098.3_2	C1orf54	C1orf54-201	chr1:150245183-150253325	+	protein_coding	-2.78533	0.145055	1.86826e-05	0.000682019	0	2.78533	5.13869	7.06396	5.61876	0	0	0
ENST00000496004.5_1	RHEB	RHEB-207	chr7:151164187-151217206	-	protein_coding	-2.78503	0.145085	0.0347372	0.0980172	0.941862	3.72689	21.4524	2.89227	25.5614	0.907776	0.897405	0.958387
ENST00000614342.1_1	SALL2	SALL2-207	chr14:21989232-22005350	-	protein_coding	-2.78075	0.145516	4.19496e-07	6.95017e-05	0.780777	3.56153	10.2369	11.098	11.1064	0.732125	0.656122	0.767831
ENST00000266682.9_1	SLC6A15	SLC6A15-201	chr12:85253267-85306655	-	protein_coding	-2.77806	0.145787	0.00110464	0.00921149	0	2.77806	3.36172	8.18686	7.05408	0	0	0
ENST00000288135.5_1	KIT	KIT-201	chr4:55524085-55606881	+	protein_coding	-2.77743	0.145851	3.68377e-07	6.5477e-05	0	2.77743	6.22321	5.86142	5.50315	0	0	0
ENST00000512123.3_1	FRAS1	FRAS1-207	chr4:78978724-79465423	+	protein_coding	-2.77599	0.145997	1.84898e-09	4.31543e-06	0.00776486	2.78376	5.98489	5.81302	5.86251	0.005085	0.011136	0
ENST00000399127.5_2	COL25A1	COL25A1-202	chr4:109745032-110223523	-	protein_coding	-2.77549	0.146047	1.60813e-07	4.16589e-05	0	2.77549	6.06261	5.969	5.52203	0	0	0
ENST00000377185.2_1	SPDYC	SPDYC-201	chr11:64937625-64940715	+	protein_coding	-2.77383	0.146216	1.54914e-06	0.000149103	0	2.77383	5.30886	6.31969	5.92746	0	0	0
ENST00000601011.1_1	NOTCH3	NOTCH3-206	chr19:15288722-15311713	-	protein_coding	-2.77261	0.146339	9.68685e-05	0.00193235	0	2.77261	4.35284	6.56813	6.87671	0	0	0
ENST00000441322.5_1	CKMT1B	CKMT1B-207	chr15:43886057-43891604	+	protein_coding	-2.77102	0.146501	0.000828926	0.00762472	0	2.77102	3.57263	8.42616	6.37868	0	0	0
ENST00000221486.4_1	RNASEH2A	RNASEH2A-201	chr19:12917394-12924451	+	protein_coding	-2.76568	0.147044	0.00263523	0.0165597	3.25931	6.02499	62.8586	66.2943	63.2561	6.9601	5.55683	15.8206
ENST00000306917.4_1	FEM1B	FEM1B-201	chr15:68570141-68588203	+	protein_coding	-2.76141	0.14748	1.74429e-05	0.000656474	2.59613	5.35755	40.2018	40.4477	39.358	4.23149	5.86192	5.15845
ENST00000367558.5_1	RGS16	RGS16-201	chr1:182567758-182573543	-	protein_coding	-2.7593	0.147696	2.27455e-05	0.000767407	0.0851993	2.8445	6.34441	7.13615	5.20101	0	0.083145	0.102189
ENST00000399275.6_1	SMAD9	SMAD9-203	chr13:37418968-37453966	-	protein_coding	-2.75685	0.147946	1.37437e-07	3.79507e-05	0	2.75685	5.94716	5.45017	5.89142	0	0	0
ENST00000514255.1_1	LINC01021	LINC01021-205	chr5:27475772-27485293	+	lincRNA	-2.75645	0.147988	0.000586119	0.0060659	0.14703	2.90348	4.49271	8.6067	6.93857	0.357631	0	0
ENST00000265643.3_1	GAL	GAL-201	chr11:68451943-68458643	+	protein_coding	-2.75571	0.148063	9.16852e-07	0.000109016	1.48355	4.23926	18.2074	18.2114	17.256	1.84763	1.61929	1.93163
ENST00000380043.7_1	SCML1	SCML1-202	chrX:17755589-17773105	+	protein_coding	-2.74554	0.149111	0.038636	0.105772	0.464059	3.2096	2.09297	15.1045	14.894	0.032935	0	1.54105
ENST00000258459.11_1	ANKRD36B	ANKRD36B-201	chr2:98121261-98206428	-	protein_coding	-2.74511	0.149156	7.66266e-09	7.23328e-06	0	2.74511	5.76377	5.79725	5.55476	0	0	0
ENST00000298299.3_1	ZNF22	ZNF22-201	chr10:45495923-45500774	+	protein_coding	-2.73381	0.150329	6.17385e-06	0.000345516	1.36527	4.09908	17.21	17.1717	14.2101	1.52648	1.60561	1.59737
ENST00000501520.1_1	AC138904.1	AC138904.1-201	chr16:28296206-28303385	-	lincRNA	-2.73122	0.150599	2.86269e-06	0.000214007	0.197209	2.92843	5.89524	6.94454	7.05409	0.142775	0.155461	0.141251
ENST00000504082.1_1	AC004069.1	AC004069.1-201	chr4:106058437-106061776	-	lincRNA	-2.72026	0.151747	0.0177966	0.0615884	0.695478	3.41574	9.14336	8.99302	10.9907	3.24697	0	0
ENST00000392952.7_1	ABLIM1	ABLIM1-206	chr10:116190872-116286690	-	protein_coding	-2.71894	0.151886	0.00134401	0.010521	0.168051	2.88699	7.87164	3.90305	8.30547	0.417055	0.000872	0
ENST00000372645.3_2	BEX3	BEX3-204	chrX:102631323-102633005	+	protein_coding	-2.71876	0.151905	4.19181e-05	0.00113816	2.2058	4.92455	31.4402	28.8265	27.9487	3.80609	2.87533	4.27149
ENST00000389658.3_1	LAMA1	LAMA1-201	chr18:6941743-7117813	-	protein_coding	-2.70866	0.152972	7.2398e-06	0.000385156	0.0364968	2.74516	5.65555	6.42576	5.09819	0.078847	0	0
ENST00000370611.3_1	LPAR3	LPAR3-201	chr1:85279087-85358896	-	protein_coding	-2.7064	0.153212	2.81028e-05	0.00087463	0	2.7064	6.71903	5.26978	4.74525	0	0	0
ENST00000406686.7_1	SLC22A23	SLC22A23-203	chr6:3269692-3456793	-	protein_coding	-2.70342	0.153529	3.50385e-06	0.000245706	0	2.70342	6.05062	5.63405	4.90781	0	0	0
ENST00000370535.7_1	LINC00632	LINC00632-201	chrX:139791932-139796987	+	lincRNA	-2.69926	0.153972	2.81778e-09	4.72034e-06	0	2.69926	5.52931	5.38504	5.57116	0	0	0
ENST00000303077.6_1	SIX2	SIX2-201	chr2:45232300-45236569	-	protein_coding	-2.69669	0.154247	3.49263e-07	6.41194e-05	0	2.69669	5.18534	5.83635	5.44412	0	0	0
ENST00000566377.5_1	MPI	MPI-213	chr15:75182380-75191782	+	protein_coding	-2.69492	0.154435	6.99411e-05	0.00157226	0.403843	3.09877	8.70349	8.24981	6.00495	0.272778	0.437716	0.265555
ENST00000354724.7_2	HEY1	HEY1-202	chr8:80676245-80680098	-	protein_coding	-2.69453	0.154477	1.83682e-05	0.000676275	0.222218	2.91675	7.12886	6.60693	5.96386	0.128922	0.064766	0.320581
ENST00000262233.10_1	EML1	EML1-201	chr14:100259675-100408397	+	protein_coding	-2.69363	0.154574	4.75091e-07	7.33285e-05	0	2.69363	5.11209	5.81003	5.50507	0	0	0
ENST00000600880.5_1	RPL37A	RPL37A-212	chr2:217363573-217394177	+	protein_coding	-2.69236	0.15471	0.0043373	0.0232548	2.1665	4.85886	30.7988	30.2521	23.5865	7.25826	2.64048	2.0095
ENST00000267294.4_1	ZIC5	ZIC5-201	chr13:100615218-100624163	-	protein_coding	-2.69158	0.154794	4.92209e-07	7.44057e-05	0.642609	3.33419	9.07506	8.81912	9.36932	0.644879	0.499401	0.542701
ENST00000374299.7_1	SLC7A3	SLC7A3-202	chrX:70145432-70150946	-	protein_coding	-2.68996	0.154968	0.000825446	0.00760702	0	2.68996	3.70182	5.01666	8.49848	0	0	0
ENST00000428462.6_1	DMC1	DMC1-203	chr22:38914954-38964414	-	protein_coding	-2.68979	0.154986	4.94197e-07	7.44057e-05	0	2.68979	5.09702	5.47796	5.80085	0	0	0
ENST00000369663.9_1	TBX18	TBX18-202	chr6:85442320-85474237	-	protein_coding	-2.68859	0.155115	2.0187e-08	1.24632e-05	0	2.68859	5.26979	5.5059	5.56863	0	0	0
ENST00000356511.6_1	PPIE	PPIE-202	chr1:40204557-40229586	+	protein_coding	-2.68796	0.155183	0.000522331	0.00565251	0	2.68796	7.21705	6.22973	3.50435	0	0	0
ENST00000556994.5_1	SRP54	SRP54-213	chr14:35451163-35498773	+	protein_coding	-2.68789	0.15519	0.0124006	0.0477308	0.000741454	2.68864	6.74718	1.83704	11.1919	0	0	0.001543
ENST00000558459.5_1	WDR61	WDR61-205	chr15:78575598-78591933	-	protein_coding	-2.68664	0.155325	2.75981e-05	0.000866856	0	2.68664	6.19753	4.42934	5.82885	0	0	0
ENST00000538790.1_1	AC156455.1	AC156455.1-201	chr12:122501212-122506522	+	lincRNA	-2.68521	0.155479	0.000116623	0.00217436	0.0386046	2.72381	6.76007	6.13745	4.20522	0	0	0.083586
ENST00000521478.1_1	HOXA6	HOXA6-202	chr7:27185281-27190222	-	processed_transcript	-2.68506	0.155495	0.000551596	0.00583928	0.488075	3.17314	8.80582	6.34311	9.19215	0.79555	0.452219	0.058147
ENST00000252338.4_1	FAM155B	FAM155B-201	chrX:68725084-68752351	+	protein_coding	-2.68475	0.155528	2.36023e-08	1.34791e-05	0	2.68475	5.38266	5.29578	5.61491	0	0	0
ENST00000377464.5_3	RERE	RERE-202	chr1:8412466-8585998	-	protein_coding	-2.6803	0.156009	7.32374e-05	0.00161999	0.0252109	2.70551	4.93293	7.10803	4.76948	0	0.053823	0
ENST00000398803.1_1	HSDL2	HSDL2-201	chr9:115142360-115234685	+	protein_coding	-2.67992	0.156049	0.0203516	0.0675674	0.690623	3.37055	9.97267	6.93911	11.7006	0	0	3.20431
ENST00000380518.7_2	COL2A1	COL2A1-202	chr12:48366748-48398269	-	protein_coding	-2.67316	0.156782	3.90258e-06	0.000263427	0	2.67316	5.07292	6.08654	5.02943	0	0	0
ENST00000503728.1_3	LUC7L3	LUC7L3-203	chr17:48823980-48829946	+	protein_coding	-2.66472	0.157703	0.000358224	0.0044226	0.741253	3.40597	12.0407	7.48979	9.75716	0.540782	1.07023	0.464395
ENST00000280665.10_1	DCP1B	DCP1B-201	chr12:2055220-2113677	-	protein_coding	-2.66179	0.158023	6.46474e-05	0.00150506	0.485499	3.14729	8.73202	8.86088	6.2472	0.324246	0.389665	0.491319
ENST00000515882.1_1	SLIT2-IT1	SLIT2-IT1-201	chr4:20393812-20396479	+	sense_intronic	-2.65923	0.158304	8.32345e-06	0.00042196	0.0208293	2.68006	5.6832	5.93969	4.67558	0.044265	0	0
ENST00000234091.8_1	ID2	ID2-201	chr2:8818975-8824583	+	protein_coding	-2.65769	0.158473	0.045168	0.117885	0.0552007	2.71289	22.1559	1.91868	3.17003	0	0.121634	0
ENST00000305097.5_1	P2RY1	P2RY1-201	chr3:152552482-152559228	+	protein_coding	-2.65759	0.158484	4.28629e-07	7.01169e-05	0.0453742	2.70296	5.65936	5.13678	5.75529	0.037896	0.025068	0.032929
ENST00000493601.5_1	PTPRU	PTPRU-208	chr1:29644272-29651810	+	processed_transcript	-2.65174	0.159128	0.000524065	0.00566382	1.52352	4.17526	19.927	14.3928	17.3069	1.26836	1.70692	2.86979
ENST00000416482.1_2	AUTS2	AUTS2-204	chr7:70194125-70229780	+	protein_coding	-2.64946	0.15938	3.53322e-06	0.000246811	0	2.64946	5.0804	4.86048	5.93165	0	0	0
ENST00000390015.7_1	GAA	GAA-202	chr17:78075393-78093676	+	protein_coding	-2.64907	0.159423	0.0178445	0.0617003	1.60895	4.25802	7.97289	25.321	28.6578	4.08542	0.922711	1.90258
ENST00000225171.6_1	DNAJC12	DNAJC12-201	chr10:69556423-69597922	-	protein_coding	-2.64737	0.159611	6.45862e-05	0.0015041	0.237125	2.88449	5.90337	5.65989	7.75847	0.126461	0.091942	0.331158
ENST00000319211.4_1	F2R	F2R-201	chr5:76011868-76031606	+	protein_coding	-2.64471	0.159905	1.00882e-05	0.000472351	0.795165	3.43988	10.3147	10.5222	8.80253	0.603117	0.762317	0.84951
ENST00000409746.5_1	PSTPIP2	PSTPIP2-201	chr18:43563502-43652226	-	protein_coding	-2.63876	0.160566	3.90996e-08	1.83074e-05	0.0333167	2.67208	5.20797	5.55528	5.3619	0.021947	0.032401	0.015807
ENST00000545891.5_1	CCDC92	CCDC92-209	chr12:124420983-124457281	-	protein_coding	-2.63184	0.161338	0.000355899	0.00440286	0	2.63184	3.67595	5.20943	7.20098	0	0	0
ENST00000618397.1_1	AC138393.3	AC138393.3-201	chr1:224181964-224182898	+	lincRNA	-2.62782	0.161789	8.94784e-06	0.000440578	0.895164	3.52298	10.9811	10.0731	10.4499	1.08685	0.802491	0.710205
ENST00000462114.1_1	AMOT	AMOT-205	chrX:112066365-112083911	-	processed_transcript	-2.62763	0.16181	2.86599e-05	0.000886743	1.89271	4.52034	22.7984	21.9158	21.1609	2.15021	2.95659	3.10798
ENST00000540638.6_2	EPB41L3	EPB41L3-204	chr18:5393092-5544280	-	protein_coding	-2.62674	0.161909	0.00397264	0.0218689	0	2.62674	3.35437	10.3497	3.76731	0	0	0
ENST00000498614.5_1	COL6A1	COL6A1-206	chr21:47421111-47424964	+	processed_transcript	-2.62196	0.162447	7.93078e-05	0.00170737	1.5037	4.12566	15.6075	16.0452	17.7902	1.30768	2.08201	2.20603
ENST00000409852.1_1	NPPC	NPPC-202	chr2:232786530-232791113	-	protein_coding	-2.62144	0.162506	6.52119e-06	0.000360142	0	2.62144	4.56218	5.14458	5.81798	0	0	0
ENST00000596048.1_2	CERS1	CERS1-203	chr19:18988726-18995042	-	protein_coding	-2.6214	0.16251	0.000164782	0.00269538	0.309421	2.93082	7.1497	6.61044	6.14899	0.225371	0	0.552985
ENST00000436636.6_1	TNIK	TNIK-204	chr3:170779128-171178197	-	protein_coding	-2.60858	0.16396	6.71625e-06	0.000367192	0.0621948	2.67078	6.10287	5.25107	4.81521	0.058552	0.033219	0.04055
ENST00000241337.8_1	GSTM2	GSTM2-201	chr1:110210688-110217908	+	protein_coding	-2.6049	0.164379	0.000430179	0.00497979	0.0124865	2.61739	4.3146	4.06587	7.58251	0	0.026305	0
ENST00000388837.6_1	KRT18	KRT18-202	chr12:53342655-53346684	+	protein_coding	-2.6021	0.164698	0.000218316	0.00322254	0.745391	3.34749	12.4468	8.17567	7.5473	0.72675	0.65822	0.645445
ENST00000455537.6_1	KIF5A	KIF5A-202	chr12:57943781-57980415	+	protein_coding	-2.60137	0.164782	9.5132e-07	0.000111013	0.0146278	2.616	4.75787	5.15684	5.49924	0.027002	0.003781	0
ENST00000366691.3_1	RHOU	RHOU-201	chr1:228870824-228882416	+	protein_coding	-2.60019	0.164917	1.32269e-05	0.000552134	0.372352	2.97254	6.66483	7.70014	6.25181	0.257933	0.411443	0.221649
ENST00000294618.11_1	DOCK6	DOCK6-201	chr19:11309971-11373128	-	protein_coding	-2.59698	0.165284	5.11968e-06	0.000309844	0	2.59698	4.42752	5.46932	5.30733	0	0	0
ENST00000444334.5_1	ASNS	ASNS-209	chr7:97481516-97501748	-	protein_coding	-2.59295	0.165747	0.041989	0.11208	3.64684	6.23978	88.3367	98.1835	47.7097	5.87956	6.33335	37.9545
ENST00000397294.7_1	MRPL23	MRPL23-203	chr11:1968574-1994023	+	protein_coding	-2.58749	0.166374	8.77076e-05	0.00181251	0.0138678	2.60136	4.35244	4.51216	6.57514	0.029257	0	0
ENST00000354451.6_1	CRYBB2P1	CRYBB2P1-201	chr22:25851685-25907595	+	processed_transcript	-2.58508	0.166653	9.68295e-06	0.00046046	0.183804	2.76888	6.56019	5.06941	5.90034	0.132625	0.149404	0.125727
ENST00000262525.5_1	ZNF629	ZNF629-201	chr16:30789770-30798523	-	protein_coding	-2.58382	0.166799	5.0016e-09	6.61475e-06	1.56839	4.15221	16.5821	16.8044	16.9566	1.92731	1.96685	2.00356
ENST00000355897.9_1	GPR160	GPR160-201	chr3:169755717-169803191	+	protein_coding	-2.58288	0.166907	3.40813e-06	0.000241012	0.983407	3.56629	11.2235	10.7255	10.5972	0.805656	1.10639	1.03203
ENST00000469531.1_1	CREB5	CREB5-211	chr7:28448954-28553456	+	processed_transcript	-2.57914	0.167341	2.09642e-05	0.000729625	0.131088	2.71023	5.73313	5.02052	5.91399	0.057591	0	0.241842
ENST00000411764.5_1	APBA2	APBA2-202	chr15:29213840-29410514	+	protein_coding	-2.57659	0.167636	1.82428e-07	4.44311e-05	0	2.57659	5.13761	5.07569	4.69246	0	0	0
ENST00000303212.2_1	NRTN	NRTN-201	chr19:5823813-5828335	+	protein_coding	-2.57139	0.168242	3.50469e-10	1.88712e-06	0	2.57139	4.99233	4.94832	4.89121	0	0	0
ENST00000423729.2_1	NAT8L	NAT8L-202	chr4:2061239-2070815	+	protein_coding	-2.56765	0.168679	5.69664e-06	0.000329574	0.155713	2.72336	5.54458	5.56846	5.70032	0.152683	0	0.199258
ENST00000527915.5_1	PARP2	PARP2-204	chr14:20811796-20826062	+	protein_coding	-2.56293	0.169232	0.00219353	0.0146504	1.1588	3.72172	11.3192	12.0317	13.3042	0.655292	0.832717	2.66882
ENST00000307428.7_1	PARM1	PARM1-201	chr4:75858326-75975323	+	protein_coding	-2.55875	0.169723	2.24471e-06	0.000186566	0.16029	2.71904	5.77498	5.49656	5.4855	0.137174	0.03259	0.188505
ENST00000525064.5_2	CLNS1A	CLNS1A-202	chr11:77327240-77348817	-	protein_coding	-2.55802	0.169808	0.0206548	0.0682403	2.60467	5.1627	36.8926	31.5269	36.2891	3.48222	14.4561	2.24833
ENST00000264634.8_1	WNT5A	WNT5A-201	chr3:55499744-55521670	-	protein_coding	-2.55654	0.169983	5.92131e-07	8.32784e-05	0.261805	2.81835	6.11828	5.75424	6.2991	0.168192	0.25141	0.179017
ENST00000344626.8_3	SMARCA4	SMARCA4-201	chr19:11071677-11172735	+	protein_coding	-2.55632	0.170008	0.0311532	0.0908458	1.52746	4.08378	12.3153	17.4474	18.849	4.10184	3.6958	0
ENST00000265284.10_1	TLE4	TLE4-201	chr9:82187660-82340148	+	protein_coding	-2.55584	0.170065	0.0366811	0.101877	1.65174	4.20758	17.4396	16.2446	18.8344	0	4.53812	4.60152
ENST00000368984.7_1	HTRA1	HTRA1-201	chr10:124221041-124274424	+	protein_coding	-2.55542	0.170115	3.69108e-06	0.000254437	0.108581	2.664	5.40668	4.79838	5.85316	0.062114	0.072535	0.100211
ENST00000477313.5_2	PLTP	PLTP-205	chr20:44527402-44540686	-	protein_coding	-2.55508	0.170155	0.000830137	0.00763299	0.260357	2.81544	4.92811	5.59506	7.9219	0	0.623671	0.058347
ENST00000222753.5_2	HOXA13	HOXA13-201	chr7:27233983-27239725	-	protein_coding	-2.55113	0.170622	4.29342e-06	0.000279979	0.144565	2.69569	5.24081	5.99321	5.23068	0.177881	0.096275	0.046007
ENST00000449987.6_2	RBM26	RBM26-204	chr13:79885959-79915347	-	protein_coding	-2.55091	0.170647	1.38174e-05	0.000566707	2.31504	4.86596	27.4926	28.6522	28.3499	3.90505	4.63501	3.45812
ENST00000293860.5_1	POLR3K	POLR3K-201	chr16:96407-103628	-	protein_coding	-2.5482	0.170968	2.32752e-06	0.000190301	2.03909	4.58729	22.3389	24.2666	22.5563	3.41826	2.94149	2.9863
ENST00000383763.5_1	TRIM71	TRIM71-201	chr3:32859510-32939318	+	protein_coding	-2.54771	0.171026	2.20669e-07	4.88962e-05	0.0462894	2.594	5.11666	5.22429	4.78115	0.045157	0.012132	0.040842
ENST00000641735.1_1	ASNSP1	ASNSP1-203	chr8:47490923-47529265	-	processed_transcript	-2.54336	0.171543	4.7351e-06	0.0002968	0	2.54336	4.26293	5.00382	5.26941	0	0	0
ENST00000542925.5_1	AC024940.1	AC024940.1-202	chr12:31264591-31269394	-	processed_transcript	-2.54192	0.171713	0.000489226	0.0054251	0.37752	2.91944	6.38549	7.61556	5.80547	0.71162	0.280935	0
ENST00000259053.5_1	CD302	CD302-201	chr2:160625364-160654753	-	protein_coding	-2.53462	0.172585	7.32315e-06	0.00038822	1.10929	3.64392	11.5818	11.7005	11.2242	1.02577	1.4192	1.04894
ENST00000337827.8_1	GALNT16	GALNT16-201	chr14:69726681-69823750	+	protein_coding	-2.53456	0.172592	6.24518e-10	2.61548e-06	0.0054788	2.54004	4.86352	4.785	4.79996	0.011458	0	0
ENST00000580919.5_1	PLEKHM1P1	PLEKHM1P1-203	chr17:62800960-62833266	-	processed_transcript	-2.53455	0.172593	0.000514302	0.00560262	0.219879	2.75443	4.76411	6.38815	6.21492	0.579685	0	0
ENST00000590474.5_1	MAP2K6	MAP2K6-206	chr17:67410839-67539472	+	protein_coding	-2.53171	0.172933	0.00174766	0.0125234	0.0791069	2.61082	4.91272	3.15155	8.2855	0	0.136548	0.037177
ENST00000254661.4_1	RAMP1	RAMP1-201	chr2:238768187-238820756	+	protein_coding	-2.53089	0.173032	1.70114e-06	0.000159303	0	2.53089	4.33566	4.94388	5.08647	0	0	0
ENST00000287538.9_1	ZIC3	ZIC3-201	chrX:136648301-136653744	+	protein_coding	-2.52441	0.173811	5.77814e-06	0.000332757	0	2.52441	4.19541	5.27132	4.84507	0	0	0
ENST00000371691.5_1	FAM69B	FAM69B-201	chr9:139615337-139618502	+	protein_coding	-2.52431	0.173822	0.000396169	0.00470912	0.270047	2.79436	4.58409	5.34194	8.42723	0.234421	0.241917	0.143722
ENST00000617130.4_3	PIK3R2	PIK3R2-207	chr19:18266690-18280104	+	protein_coding	-2.52216	0.174082	0.00668881	0.0311599	0.65916	3.18132	11.4312	3.62064	11.9958	0.501086	0.651351	0.588679
ENST00000315264.7_1	KIF26A	KIF26A-201	chr14:104605377-104647231	+	protein_coding	-2.5215	0.174162	7.80213e-09	7.23328e-06	0.00500074	2.5265	4.82236	4.81575	4.64874	0	0	0.010453
ENST00000371817.7_1	COL5A1	COL5A1-201	chr9:137533620-137736689	+	protein_coding	-2.51944	0.17441	4.73675e-07	7.33285e-05	0.00233629	2.52178	4.42501	4.97736	4.84096	0	0.00487	0
ENST00000368908.9_1	LYSMD1	LYSMD1-201	chr1:151132224-151138395	-	protein_coding	-2.5183	0.174549	1.78035e-05	0.000664484	0.865317	3.38361	9.10478	10.225	9.02288	1.036	0.638014	0.812861
ENST00000325318.9_1	TCTEX1D2	TCTEX1D2-201	chr3:196018090-196045159	-	protein_coding	-2.51712	0.174691	0.000492158	0.0054512	0.176622	2.69374	6.60852	3.62106	6.70287	0.112588	0.151238	0.127214
ENST00000373552.8_2	NGEF	NGEF-202	chr2:233743925-233792864	-	protein_coding	-2.51664	0.17475	0.00525477	0.0264701	0	2.51664	2.13022	8.10499	5.57496	0	0	0
ENST00000505775.5_1	LINC01021	LINC01021-202	chr5:27472414-27494425	+	lincRNA	-2.51615	0.174809	0.00165252	0.0120711	0.0236463	2.5398	6.59164	6.04962	2.6742	0.0504	0	0
ENST00000412232.2_1	ADGRA2	ADGRA2-202	chr8:37654774-37701494	+	protein_coding	-2.51216	0.175293	2.62833e-06	0.000202293	0.0962137	2.60837	5.09202	4.81787	5.3984	0.146283	0.043349	0.021335
ENST00000249373.7_1	SMO	SMO-201	chr7:128828713-128853386	+	protein_coding	-2.51092	0.175443	2.53508e-07	5.26663e-05	1.43658	3.94751	14.9414	14.6077	13.76	1.70666	1.66141	1.75307
ENST00000602520.5_1	SNHG8	SNHG8-203	chr4:119199864-119200978	+	lincRNA	-2.50978	0.175583	9.99421e-05	0.00197321	2.58932	5.09909	38.6036	28.2297	33.7841	4.83742	5.86761	4.43699
ENST00000325590.9_1	AMPH	AMPH-201	chr7:38423305-38671020	-	protein_coding	-2.50938	0.175631	1.2772e-05	0.000541509	0	2.50938	5.3095	4.82118	4.02564	0	0	0
ENST00000366910.9_1	MARC1	MARC1-201	chr1:220960101-220992999	+	protein_coding	-2.50784	0.175818	9.2022e-07	0.000109072	0.112594	2.62044	5.50357	5.16378	4.80086	0.094526	0.060681	0.088608
ENST00000618918.4_1	BTBD3	BTBD3-215	chr20:11873141-11907238	+	protein_coding	-2.50717	0.1759	0.0414603	0.111083	0.854834	3.36201	8.80552	7.80759	11.5854	0.010238	4.73512	0.021001
ENST00000316824.3_1	ALX1	ALX1-201	chr12:85673885-85695562	+	protein_coding	-2.5068	0.175946	2.4809e-06	0.000197728	0	2.5068	5.17996	4.321	4.58324	0	0	0
ENST00000295830.12_2	RPL22L1	RPL22L1-201	chr3:170582664-170588272	-	protein_coding	-2.50546	0.176109	1.26046e-06	0.000131224	1.21569	3.72115	11.7959	12.1576	12.6233	1.39481	1.17645	1.40357
ENST00000407585.5_1	PACSIN2	PACSIN2-205	chr22:43265781-43355887	-	protein_coding	-2.50527	0.176132	0.0408766	0.110024	0.740702	3.24597	4.49665	12.538	10.475	3.66574	0	0
ENST00000408968.3_1	IFITM1	IFITM1-202	chr11:313853-315272	+	protein_coding	-2.49951	0.176837	8.06171e-05	0.00172349	0.640426	3.13994	8.0962	7.64549	7.70956	0.295576	0.572528	0.859093
ENST00000558355.1_1	IGF1R	IGF1R-204	chr15:99251060-99434848	+	protein_coding	-2.49911	0.176886	0.0234517	0.0745283	1.30139	3.8005	13.0137	19.073	8.61682	3.29765	0.041353	2.34537
ENST00000433071.2_1	AP000251.1	AP000251.1-201	chr21:32931558-32932800	+	lincRNA	-2.49867	0.17694	3.44983e-05	0.000999855	0	2.49867	5.0862	5.21964	3.76886	0	0	0
ENST00000327987.8_3	IGDCC3	IGDCC3-201	chr15:65619465-65670378	-	protein_coding	-2.49268	0.177676	7.48892e-06	0.000393434	0	2.49268	4.03685	4.78347	5.12016	0	0	0
ENST00000372674.5_1	BEX2	BEX2-201	chrX:102564430-102565935	-	protein_coding	-2.49089	0.177897	0.000164997	0.00269587	0.10713	2.59802	4.47701	4.45834	6.424	0	0	0.249535
ENST00000298282.13_1	PKNOX2	PKNOX2-201	chr11:125034602-125303285	+	protein_coding	-2.49048	0.177947	3.93081e-07	6.67376e-05	0	2.49048	4.86235	4.33514	4.67427	0	0	0
ENST00000253193.8_1	LRP3	LRP3-201	chr19:33685490-33699773	+	protein_coding	-2.48962	0.178053	8.67569e-06	0.000431903	0.0517955	2.54141	4.17988	5.06076	5.2846	0.045254	0.045959	0.018684
ENST00000610475.4_1	MRNIP	MRNIP-225	chr5:179264277-179269020	-	protein_coding	-2.48899	0.178131	0.00181439	0.0128755	0.418335	2.90732	4.13921	9.07951	7.15155	0.04271	0.511027	0.51481
ENST00000586659.5_1	KANK2	KANK2-201	chr19:11274943-11308197	-	protein_coding	-2.48705	0.17837	2.56922e-06	0.000200288	0	2.48705	4.2407	5.09194	4.51933	0	0	0
ENST00000565831.6_1	CACNA1H	CACNA1H-206	chr16:1203738-1271765	+	protein_coding	-2.48575	0.178532	7.17696e-05	0.00160072	0	2.48575	3.64589	5.59772	4.73312	0	0	0
ENST00000506797.5_1	MGST2	MGST2-204	chr4:140586989-140625378	+	protein_coding	-2.48149	0.17906	0.000666415	0.00660779	0.203647	2.68513	7.01522	4.59941	4.92734	0	0	0.527255
ENST00000344429.9_1	NOVA1	NOVA1-201	chr14:26939324-27066646	-	protein_coding	-2.47929	0.179333	0.000555656	0.00587236	0	2.47929	5.33734	2.97178	5.88852	0	0	0
ENST00000619684.4_1	KIAA1524	KIAA1524-207	chr3:108269914-108308258	-	protein_coding	-2.47807	0.179484	0.00215968	0.0145142	0.511488	2.98956	4.32461	10.2295	7.37899	0.784011	0.261095	0.28758
ENST00000463592.3_1	CNTNAP2	CNTNAP2-203	chr7:148036553-148118090	+	protein_coding	-2.47729	0.179582	2.53606e-07	5.26663e-05	0	2.47729	4.30796	4.64743	4.76018	0	0	0
ENST00000330688.8_1	RARB	RARB-201	chr3:25469802-25639423	+	protein_coding	-2.47348	0.180056	0.000314289	0.00405205	0	2.47348	6.19522	4.51775	3.31493	0	0	0
ENST00000382159.7_1	GNG7	GNG7-201	chr19:2511217-2702707	-	protein_coding	-2.47268	0.180156	1.13428e-07	3.36319e-05	0.00746635	2.48014	4.77161	4.39605	4.57726	0.015647	0	0
ENST00000337018.10_2	SUGP2	SUGP2-202	chr19:19101702-19144368	-	protein_coding	-2.46909	0.180605	0.0483623	0.123539	1.79282	4.26191	39.0288	5.48377	26.2073	4.75637	1.63472	1.7428
ENST00000506098.5_1	NUP54	NUP54-204	chr4:77057474-77068974	-	processed_transcript	-2.46846	0.180684	5.47712e-05	0.0013493	0.118094	2.58655	5.53273	4.54695	4.98053	0	0.27835	0
ENST00000421491.3_1	PABPC4L	PABPC4L-201	chr4:135117488-135122903	-	protein_coding	-2.46769	0.180781	1.07152e-05	0.000488957	0.816057	3.28374	8.30633	9.2139	8.7173	0.763573	0.940291	0.594824
ENST00000285908.5_1	BOD1	BOD1-201	chr5:173034524-173043591	-	protein_coding	-2.46671	0.180904	0.0380215	0.104583	1.58371	4.05042	13.6847	14.9229	18.4537	4.93275	0	3.53916
ENST00000309071.9_1	ZGRF1	ZGRF1-202	chr4:113510786-113558066	-	protein_coding	-2.46326	0.181337	0.00376358	0.0210856	0.251244	2.7145	7.33355	2.78619	7.96202	0.110671	0.33889	0.133876
ENST00000360652.6_2	PCED1A	PCED1A-202	chr20:2815960-2821338	-	protein_coding	-2.46132	0.18158	0.000292092	0.00387586	1.81625	4.27758	16.1235	19.8584	19.4251	1.82651	2.48691	3.4315
ENST00000566709.5_1	HAGH	HAGH-208	chr16:1859125-1877158	-	protein_coding	-2.45799	0.182	0.00358081	0.0203694	0.212373	2.67036	5.54625	3.17749	8.43348	0	0	0.555221
ENST00000284440.8_1	UCHL1	UCHL1-201	chr4:41258850-41270446	+	protein_coding	-2.45745	0.182068	0.00596091	0.0288197	0	2.45745	5.96594	1.91778	7.1521	0	0	0
ENST00000469605.1_1	RPL24	RPL24-203	chr3:101400886-101405539	-	protein_coding	-2.45527	0.182343	0.00482394	0.0249816	2.74478	5.20005	24.3567	49.3449	37.9105	3.64413	9.09022	5.42652
ENST00000331129.3_1	ID2	ID2-202	chr2:8822186-8823137	+	protein_coding	-2.45045	0.182953	0.000251001	0.00351112	0.194719	2.64517	6.22233	3.85961	5.97509	0.241583	0.030652	0.171551
ENST00000395544.8_1	ULK2	ULK2-202	chr17:19677263-19771230	-	protein_coding	-2.447	0.183392	1.05131e-06	0.000118111	0	2.447	4.35736	4.83065	4.19027	0	0	0
ENST00000503564.5_1	POLR2J3	POLR2J3-207	chr7:102178788-102207076	-	processed_transcript	-2.44543	0.183591	4.94392e-05	0.00127242	1.90408	4.34951	16.5774	20.1986	21.7373	2.41224	2.80621	3.03667
ENST00000307106.3_1	SMIM4	SMIM4-201	chr3:52570618-52574541	+	protein_coding	-2.44481	0.18367	0.000675543	0.0066579	1.2541	3.69891	11.4992	12.6527	11.8335	0.987837	1.01376	2.38979
ENST00000325888.12_1	FLNC	FLNC-201	chr7:128470431-128499326	+	protein_coding	-2.44176	0.184059	0.0104207	0.0423594	0.0138487	2.45561	6.89886	7.01593	1.60685	0.014236	0.009394	0.005326
ENST00000286307.5_1	LSM11	LSM11-201	chr5:157170703-157187717	+	protein_coding	-2.43829	0.184502	5.31752e-07	7.80103e-05	0.799942	3.23824	8.53197	8.34205	8.43614	0.752645	0.822736	0.651969
ENST00000165698.9_1	REEP1	REEP1-201	chr2:86441116-86564777	-	protein_coding	-2.43828	0.184504	6.03901e-07	8.38388e-05	0.00721723	2.44549	4.1331	4.61957	4.60296	0	0.015121	0
ENST00000470747.4_1	AC004080.3	AC004080.3-201	chr7:27203154-27219632	-	protein_coding	-2.43556	0.184852	0.00052356	0.00566094	0	2.43556	6.50021	3.3763	3.82334	0	0	0
ENST00000239144.4_1	HOXB8	HOXB8-201	chr17:46689708-46692301	-	protein_coding	-2.43396	0.185057	8.73995e-05	0.00181103	0.263714	2.69767	6.38311	4.8248	5.34923	0.246678	0.031992	0.345015
ENST00000285279.9_1	VOPP1	VOPP1-201	chr7:55538306-55640218	-	protein_coding	-2.42855	0.185753	0.000147732	0.00251618	1.44473	3.87328	12.6854	13.993	14.3381	2.19887	1.18214	1.88965
ENST00000317005.2_1	TIGD2	TIGD2-201	chr4:90033968-90036050	+	protein_coding	-2.42745	0.185894	0.000103555	0.00201456	0.187053	2.6145	4.13716	6.09913	5.29802	0.110774	0.264375	0.050567
ENST00000270570.8_1	SLC47A1	SLC47A1-201	chr17:19437167-19482347	+	protein_coding	-2.42715	0.185932	0.00323546	0.0189843	0.018669	2.44582	5.66698	2.21134	6.55405	0	0.017662	0.021542
ENST00000370938.7_1	CTH	CTH-202	chr1:70876955-70905253	+	protein_coding	-2.42605	0.186074	0.000183868	0.00288224	2.24451	4.67055	30.1626	23.0819	21.0094	3.35039	3.48	4.4599
ENST00000395325.7_2	DNAJC6	DNAJC6-203	chr1:65730437-65881552	+	protein_coding	-2.42563	0.186129	2.33524e-05	0.000780664	0	2.42563	5.19474	4.20995	3.80509	0	0	0
ENST00000620924.1_1	NDFIP2	NDFIP2-206	chr13:80055609-80128231	+	protein_coding	-2.4249	0.186223	0.0203226	0.0674919	2.08265	4.50755	19.269	25.27	21.1019	5.74051	0.742449	5.47098
ENST00000613670.4_1	LIG1	LIG1-221	chr19:48618781-48668884	-	protein_coding	-2.42408	0.186328	0.0152367	0.0552611	0.740597	3.16468	6.30219	9.53558	8.37298	2.66233	0	0.273705
ENST00000369880.7_1	AS3MT	AS3MT-201	chr10:104629273-104661656	+	protein_coding	-2.42405	0.186332	0.000111108	0.002105	0.00304309	2.42709	5.38159	4.58065	3.36787	0.006348	0	0
ENST00000380381.3_1	RPS6	RPS6-202	chr9:19378772-19380234	-	protein_coding	-2.42316	0.186447	0.000149908	0.00253785	2.73742	5.16058	27.5399	40.7987	37.3579	5.57724	6.08072	5.36816
ENST00000614750.1_1	ARL8A	ARL8A-204	chr1:202102532-202113871	-	protein_coding	-2.42175	0.18663	9.11405e-05	0.00186042	0.443262	2.86501	5.29674	5.92119	7.87293	0.291704	0.387745	0.402273
ENST00000369816.4_1	ELOVL4	ELOVL4-201	chr6:80624529-80657297	-	protein_coding	-2.42101	0.186725	9.01048e-06	0.000442217	1.35818	3.7792	13.6315	12.8056	11.8118	1.67488	1.68606	1.345
ENST00000621082.1_1	SHISA8	SHISA8-202	chr22:42305558-42310671	-	protein_coding	-2.41976	0.186888	1.92676e-06	0.000171736	0	2.41976	4.77201	4.03961	4.26665	0	0	0
ENST00000267842.9_1	SLC27A2	SLC27A2-201	chr15:50474393-50528592	+	protein_coding	-2.41798	0.187118	1.16554e-06	0.000126689	0.033728	2.45171	4.83906	4.28624	4.30424	0	0.024361	0.047144
ENST00000613258.4_2	NUP153	NUP153-203	chr6:17615266-17707065	-	protein_coding	-2.41718	0.187222	4.55905e-05	0.00119916	0.00480652	2.42198	5.20328	3.57195	4.42684	0	0	0.010045
ENST00000371571.4_2	KCNG1	KCNG1-201	chr20:49620193-49639666	-	protein_coding	-2.41507	0.187496	1.23043e-06	0.000129464	0	2.41507	4.35979	4.65838	4.00249	0	0	0
ENST00000371019.3_1	FRAT2	FRAT2-201	chr10:99092254-99094466	-	protein_coding	-2.41141	0.187972	6.84856e-06	0.000371954	1.1057	3.51711	9.41136	11.4066	10.6175	1.18908	1.19955	1.06992
ENST00000256925.11_1	CABLES1	CABLES1-201	chr18:20715727-20840431	+	protein_coding	-2.40794	0.188425	9.54013e-06	0.000457198	0.0911066	2.49905	5.11133	4.86538	4.04004	0.085094	0.060137	0.050626
ENST00000622235.4_1	SCARF2	SCARF2-202	chr22:20779105-20792112	-	protein_coding	-2.40488	0.188825	0.0163428	0.0580303	0.0200986	2.42497	1.332	7.619	6.70521	0.020448	0.000188	0.021594
ENST00000373428.5_1	ZNF362	ZNF362-201	chr1:33736176-33766320	+	protein_coding	-2.40485	0.188828	0.00274711	0.0170023	0.574347	2.9792	4.71208	6.23207	10.8694	0.271085	0.340719	0.937201
ENST00000371116.3_1	FOXD3	FOXD3-201	chr1:63788712-63790797	+	protein_coding	-2.40485	0.188829	1.59878e-07	4.16589e-05	0.0398141	2.44466	4.65749	4.32357	4.35702	0.0101	0.040447	0.033645
ENST00000338492.8_1	DPYSL4	DPYSL4-201	chr10:134000404-134019280	+	protein_coding	-2.40309	0.189059	1.7773e-06	0.00016312	0	2.40309	4.04866	4.71414	4.12959	0	0	0
ENST00000310942.8_1	CBX2	CBX2-202	chr17:77751931-77761782	+	protein_coding	-2.40005	0.189458	1.5668e-07	4.14426e-05	1.86351	4.26356	17.8764	18.6295	18.1228	2.66368	2.51878	2.73772
ENST00000329271.7_1	GRPEL2	GRPEL2-201	chr5:148724993-148734146	+	protein_coding	-2.39884	0.189616	0.0291929	0.0868632	1.51602	3.91487	4.69767	23.4717	23.6103	1.33296	1.90419	2.45283
ENST00000525849.5_2	EYA4	EYA4-211	chr6:133562769-133851364	+	protein_coding	-2.39681	0.189884	0.000133976	0.00237589	0	2.39681	4.31506	5.39785	3.29529	0	0	0
ENST00000491322.1_1	GLUL	GLUL-212	chr1:182352029-182359439	-	processed_transcript	-2.39628	0.189954	0.0109562	0.0438667	1.26076	3.65704	13.0395	21.2877	5.41534	1.31301	1.74986	1.16315
ENST00000376544.7_1	TLE4	TLE4-205	chr9:82186688-82341797	+	protein_coding	-2.3951	0.190109	0.000973347	0.00847578	1.64006	4.03517	15.542	17.0815	13.7332	1.21999	3.1405	2.29397
ENST00000576409.5_2	ATPAF1	ATPAF1-214	chr1:47098409-47134126	-	protein_coding	-2.3926	0.190438	3.72506e-05	0.00105172	1.36038	3.75298	12.8488	13.2707	11.4001	1.26449	1.57851	1.89872
ENST00000421202.5_1	CCDC18-AS1	CCDC18-AS1-205	chr1:93776726-93811368	-	lincRNA	-2.39164	0.190566	0.000407248	0.00479613	0.491525	2.88316	6.52399	6.4699	6.14487	0.308771	0.881108	0.128792
ENST00000373798.5_1	EPB41	EPB41-206	chr1:29220253-29446558	+	protein_coding	-2.38747	0.191118	0.00813335	0.0356883	0.713228	3.1007	5.94317	5.72392	12.5215	0.416237	1.67284	0.164129
ENST00000521421.1_1	HOXA10	HOXA10-204	chr7:27211082-27212508	-	processed_transcript	-2.38729	0.191141	0.0225744	0.0726311	0.0219512	2.40924	1.12525	7.59875	7.20199	0.046704	0	0
ENST00000602975.1_1	AC090181.2	AC090181.2-201	chr15:77359996-77360667	-	sense_intronic	-2.38703	0.191176	0.00018851	0.00293365	0.699308	3.08633	7.06278	9.57504	6.18574	0.577415	0.790348	0.515846
ENST00000330288.5_1	SMIM10	SMIM10-201	chrX:134124968-134126503	+	protein_coding	-2.38692	0.19119	1.79349e-07	4.44311e-05	0	2.38692	4.36966	4.31958	4.00933	0	0	0
ENST00000366621.7_1	KCNK1	KCNK1-202	chr1:233749750-233808258	+	protein_coding	-2.38476	0.191476	1.24669e-05	0.000534892	0.0181699	2.40293	3.97068	4.99312	3.96588	0.024679	0.013494	0
ENST00000399012.6_4	PLCXD1	PLCXD1-203	chrX:192989-220020	+	protein_coding	-2.38267	0.191754	0.00116628	0.00957198	1.51896	3.90163	13.5853	15.081	13.233	3.23988	1.40357	1.30966
ENST00000407981.6_3	MARC1	MARC1-202	chr1:220964833-220987730	+	protein_coding	-2.38068	0.192019	0.000515744	0.00560941	0	2.38068	2.78495	4.85738	5.37092	0	0	0
ENST00000261733.6_2	ALDH2	ALDH2-201	chr12:112204726-112255333	+	protein_coding	-2.37738	0.192458	1.06974e-06	0.000119469	0.313756	2.69114	5.78974	5.06456	5.54163	0.22705	0.247531	0.254401
ENST00000418905.1_1	ZNF620	ZNF620-202	chr3:40547531-40559200	+	protein_coding	-2.37533	0.192732	0.00301937	0.0181148	0.539125	2.91445	6.07179	4.75822	9.5244	0.949254	0.031422	0.526066
ENST00000467748.1_1	RABGGTB	RABGGTB-206	chr1:76256954-76257544	+	processed_transcript	-2.37378	0.19294	0.00229885	0.0151409	1.72573	4.09951	12.4255	16.4726	20.4753	2.44694	3.53638	1.31393
ENST00000454189.6_1	GPM6B	GPM6B-205	chrX:13789575-13956757	-	protein_coding	-2.37305	0.193037	9.4874e-07	0.000111013	0	2.37305	3.88522	4.20015	4.47242	0	0	0
ENST00000563233.2_1	HYKK	HYKK-203	chr15:78805431-78829714	+	protein_coding	-2.37276	0.193076	0.00764525	0.0341833	0.313026	2.68579	5.99387	3.02862	8.45437	0.917303	0	0
ENST00000542965.2_2	PRR14	PRR14-203	chr16:30662511-30667734	+	protein_coding	-2.372	0.193177	1.19147e-06	0.000127756	1.94756	4.31957	18.6735	18.6092	19.6355	3.05593	2.64969	2.87685
ENST00000295886.4_1	NKX6-1	NKX6-1-201	chr4:85413140-85419603	-	protein_coding	-2.37145	0.193251	1.28271e-06	0.00013226	0.023145	2.3946	3.91163	4.39611	4.48566	0	0.022192	0.026525
ENST00000626064.1_1	POLR1D	POLR1D-208	chr13:28194895-28196078	+	processed_transcript	-2.3712	0.193285	0.000145931	0.0024919	0.678757	3.04995	6.65291	7.30534	7.93716	0.472936	0.981007	0.405753
ENST00000484667.2_1	HES4	HES4-204	chr1:934350-935361	-	protein_coding	-2.36998	0.193448	0.000205209	0.00309513	2.36732	4.73731	25.5307	27.6753	23.9435	4.8327	4.80592	3.05661
ENST00000342058.8_1	FBLN5	FBLN5-202	chr14:92336386-92414167	-	protein_coding	-2.36882	0.193604	3.82413e-06	0.000259944	0	2.36882	4.15583	4.60294	3.77024	0	0	0
ENST00000261254.7_1	CCND2	CCND2-201	chr12:4382938-4414516	+	protein_coding	-2.3677	0.193755	1.70282e-08	1.13598e-05	3.3036	5.67129	50.2817	50.3011	49.3035	8.96436	8.67709	8.98279
ENST00000314641.9_1	BVES	BVES-201	chr6:105544697-105585049	-	protein_coding	-2.36566	0.194028	7.26855e-07	9.41984e-05	0	2.36566	4.40175	3.86596	4.20835	0	0	0
ENST00000404816.6_1	LTBP1	LTBP1-203	chr2:33172039-33624426	+	protein_coding	-2.36415	0.194232	4.20468e-06	0.000276708	0.483662	2.84781	6.42787	6.07611	6.09855	0.523763	0.369385	0.310228
ENST00000264020.6_1	IFT46	IFT46-201	chr11:118415258-118436750	-	protein_coding	-2.36231	0.194479	0.0195288	0.0657127	1.0135	3.37581	4.96148	13.4689	11.968	2.12061	0.051714	1.50693
ENST00000265678.8_1	RPS6KA2	RPS6KA2-201	chr6:166822852-167040731	-	protein_coding	-2.36228	0.194483	0.00652805	0.0306134	0	2.36228	7.34006	4.72776	1.84578	0	0	0
ENST00000393063.5_1	DICER1	DICER1-202	chr14:95552566-95608055	-	protein_coding	-2.3622	0.194495	0.00900736	0.0382908	1.06738	3.42957	16.577	10.4118	5.23611	1.27729	0.511868	1.67304
ENST00000498652.1_1	AC004080.5	AC004080.5-201	chr7:27186985-27192217	-	processed_transcript	-2.36162	0.194573	0.00579572	0.0282622	0	2.36162	7.52417	4.35494	1.97404	0	0	0
ENST00000344425.7_1	KCNQ2	KCNQ2-201	chr20:62065031-62103993	-	protein_coding	-2.36082	0.194681	0.0242595	0.0762521	0	2.36082	5.76102	1.0789	8.64236	0	0	0
ENST00000503798.1_1	LUC7L3	LUC7L3-204	chr17:48828412-48829911	+	processed_transcript	-2.36011	0.194776	0.000352904	0.00437771	0.881469	3.24158	8.80457	10.5847	6.4495	1.08103	0.651546	0.819184
ENST00000328933.9_1	SYNGR1	SYNGR1-203	chr22:39746001-39781593	+	protein_coding	-2.36011	0.194776	1.01271e-06	0.000115321	0.635167	2.99528	6.84238	7.14967	6.93265	0.648003	0.533007	0.482897
ENST00000569978.1_1	MAZ	MAZ-215	chr16:29819414-29820256	+	protein_coding	-2.36007	0.194782	0.00213372	0.0143915	1.08042	3.44048	8.52335	11.4752	9.77033	2.19814	0.942586	0.522076
ENST00000553001.1_2	AP000275.2	AP000275.2-202	chr21:33951133-33984591	-	protein_coding	-2.35814	0.195043	0.00371546	0.0209051	0.119881	2.47802	3.69931	2.93849	8.34356	0	0.064324	0.205562
ENST00000264377.7_1	ADAM23	ADAM23-201	chr2:207308263-207485854	+	protein_coding	-2.35787	0.19508	3.36036e-07	6.27534e-05	0.173714	2.53158	4.54821	4.77637	5.03166	0.116435	0.124114	0.143499
ENST00000398881.3_1	TOMM6	TOMM6-201	chr6:41755403-41757634	+	protein_coding	-2.35728	0.195159	0.0296374	0.0878355	3.41938	5.77666	31.1147	53.6557	92.8656	17.8569	4.13984	11.6354
ENST00000602830.1_1	LINC00632	LINC00632-204	chrX:139798211-139854508	+	lincRNA	-2.35513	0.19545	0.000209151	0.00314077	0	2.35513	3.03116	4.35131	5.20878	0	0	0
ENST00000624667.1_3	MIR4697HG	MIR4697HG-201	chr11:133766333-133771496	-	TEC	-2.35436	0.195554	2.48958e-06	0.000197953	0	2.35436	3.84167	3.97906	4.54699	0	0	0
ENST00000373797.1_1	EPB41	EPB41-205	chr1:29241091-29391733	+	protein_coding	-2.35196	0.19588	0.000644879	0.00646199	1.87736	4.22932	17.3794	21.2927	15.1052	3.37964	3.06524	1.78551
ENST00000562883.6_1	MTSS1L	MTSS1L-202	chr16:70708223-70712242	-	protein_coding	-2.35052	0.196076	4.73953e-05	0.00123542	0.0421732	2.39269	5.18322	3.82002	3.85903	0	0	0.091657
ENST00000508596.5_1	WDR17	WDR17-205	chr4:176986985-177100920	+	protein_coding	-2.34971	0.196185	1.14387e-05	0.00050753	0	2.34971	4.73646	3.92093	3.6915	0	0	0
ENST00000377126.3_1	KLF9	KLF9-201	chr9:72999513-73029540	-	protein_coding	-2.34754	0.196481	1.36198e-05	0.000561547	1.89612	4.24366	18.3287	17.3484	18.1695	2.85146	3.05135	2.3048
ENST00000621575.1_1	AL161891.1	AL161891.1-201	chr13:34420327-34424962	+	sense_intronic	-2.34643	0.196633	6.38823e-06	0.000355402	1.39439	3.74081	12.5131	12.0616	12.5376	1.48166	1.91033	1.51521
ENST00000222256.8_1	RAB3A	RAB3A-201	chr19:18307594-18314884	-	protein_coding	-2.34528	0.196789	8.979e-07	0.000108142	0.639164	2.98445	6.87496	6.58478	7.29912	0.526506	0.531315	0.616069
ENST00000355467.5_1	ZNF512	ZNF512-201	chr2:27805897-27846082	+	protein_coding	-2.3414	0.197319	0.00305996	0.0182826	0.581467	2.92287	3.65364	8.30927	9.0671	0.700045	0.380273	0.42788
ENST00000419277.5_1	HLA-DPA1	HLA-DPA1-242	chr6:33032346-33048487	-	protein_coding	-2.33683	0.197945	6.54119e-05	0.00151785	0	2.33683	3.97637	3.33068	4.98274	0	0	0
ENST00000602806.1_1	LINC01703	LINC01703-202	chr1:226271340-226277197	+	lincRNA	-2.33555	0.198121	1.91012e-05	0.000690503	0.279796	2.61534	5.78158	4.47306	5.19913	0.187867	0.171496	0.285798
ENST00000369872.3_1	SYPL2	SYPL2-201	chr1:110009250-110024759	+	protein_coding	-2.33485	0.198217	2.93249e-06	0.000217154	0.00865854	2.34351	3.76739	3.98336	4.50296	0.018168	0	0
ENST00000536681.7_1	FAR2	FAR2-202	chr12:29302133-29488549	+	protein_coding	-2.33457	0.198255	4.60604e-06	0.000293014	0.538621	2.87319	6.03045	5.98708	7.00702	0.425312	0.427767	0.506107
ENST00000433358.5_1	NME4	NME4-204	chr16:447237-450648	+	protein_coding	-2.3313	0.198706	0.0365435	0.101623	1.00896	3.34026	26.6853	6.49455	4.00676	1.0795	1.28095	0.718339
ENST00000399583.3_1	RADIL	RADIL-201	chr7:4838736-4923350	-	protein_coding	-2.33105	0.198739	0.000343307	0.00430153	0	2.33105	2.78542	4.82879	4.77375	0	0	0
ENST00000407464.6_1	HIC2	HIC2-201	chr22:21771693-21805752	+	protein_coding	-2.33063	0.198798	4.26324e-05	0.00114861	1.45429	3.78492	12.3228	13.0975	12.9439	1.80987	2.11364	1.3518
ENST00000603486.5_1	SLC25A27	SLC25A27-203	chr6:46626400-46636484	+	protein_coding	-2.32985	0.198904	0.00370593	0.0208623	0.430583	2.76044	3.06452	8.40254	7.14086	0.196016	0.44364	0.417945
ENST00000406191.5_2	MTA1	MTA1-203	chr14:105886229-105937066	+	protein_coding	-2.3295	0.198953	0.0243742	0.0764733	1.65868	3.98818	24.3667	11.3629	11.7438	5.92654	1.04147	1.22575
ENST00000587656.5_1	DOCK6	DOCK6-207	chr19:11310173-11347173	-	protein_coding	-2.32801	0.199158	4.61693e-05	0.00121143	0	2.32801	4.95283	3.55678	3.66684	0	0	0
ENST00000232219.6_1	RBP1	RBP1-201	chr3:139236276-139258671	-	protein_coding	-2.32685	0.199319	0.0080069	0.0352999	0	2.32685	5.47498	6.46374	1.61312	0	0	0
ENST00000602313.1_1	KC877982.1	KC877982.1-201	chrX:150350858-150351327	+	lincRNA	-2.3255	0.199505	1.53793e-08	1.05396e-05	0	2.3255	3.89957	4.05754	4.08209	0	0	0
ENST00000507625.5_2	ADGRL3	ADGRL3-207	chr4:62362906-62936776	+	protein_coding	-2.32444	0.199652	0.00216422	0.0145333	0	2.32444	2.2702	4.35273	6.17846	0	0	0
ENST00000456004.1_2	STK32C	STK32C-205	chr10:134143785-134145341	-	protein_coding	-2.32248	0.199924	2.44106e-05	0.000801467	1.19851	3.52099	10.5549	10.5944	10.2916	1.17036	1.10348	1.64782
